# Supplementary material for: One-pot photoenzymatic synthesis of β-chiral malononitrile derivatives
Source: Royal Society of Chemistry journal article supplement (doi:10.1039/d4qo00859f), 2024-01-01
Supplement: d4qo00859f1.pdf [file d4qo00859f1.pdf]

# Supplemental Information

1

## 2 3 **One pot Photoenzymatic Synthesis of $\beta$ -chiral malononitrile** 4 **derivatives**

5 Xin-Yue Fan<sup>a</sup>, Yuan Yu<sup>a</sup>, Ru-De Lin<sup>a</sup>, Yao Yao<sup>a</sup>, Ming-Liang Shi<sup>a</sup>, Yan-Hong Liu<sup>a</sup>,  
6 Kun Li<sup>a,\*</sup>, Na Wang<sup>a,\*</sup>

7 <sup>a</sup> Key Laboratory of Green Chemistry & Technology, Ministry of Education, College of  
8 Chemistry, Sichuan University, Chengdu 610064, P. R. China

### 9 **Context**

|    |                                                                                                        |    |
|----|--------------------------------------------------------------------------------------------------------|----|
| 10 | 1 General Information .....                                                                            | 2  |
| 11 | 1.1 Sequence information.....                                                                          | 2  |
| 12 | 1.2 Materials and analytical methods .....                                                             | 6  |
| 13 | 2 Expression and purification of ene reductase.....                                                    | 7  |
| 14 | 2.1 Methods.....                                                                                       | 7  |
| 15 | 2.2 SDS-PAGE of crude and purified enzymes .....                                                       | 8  |
| 16 | 3 Experimental Procedures.....                                                                         | 8  |
| 17 | 3.1 General procedures for photoenzymatic synthesis of malononitrile alkylated<br>18 derivatives ..... | 8  |
| 19 | 3.2 Docking models.....                                                                                | 9  |
| 20 | 3.3 Molecular dynamics simulation .....                                                                | 9  |
| 21 | 3.4 Optimization of photocatalytic reaction conditions .....                                           | 10 |
| 22 | 3.5 Optimization of photoenzymatic reaction conditions .....                                           | 13 |
| 23 | 3.6 Enzyme kinetics .....                                                                              | 15 |
| 24 | 3.7 Gene sequence comparison .....                                                                     | 16 |
| 25 | 4 Chiral HPLC data for enantiomers and reaction systems.....                                           | 18 |
| 26 | 5 <sup>1</sup> H NMR and <sup>13</sup> C NMR .....                                                     | 25 |
| 27 | 6 References .....                                                                                     | 63 |

28

# 1 General Information

## 2 1.1 Sequence information

3 OYE1 (from *Saccharomyces pastorianus*)

4 Gen Bank: CP049012.1

### 5 Protein sequence:

6 MSFVKDFKPQALGDTNLFKPIKIGNNELLHRAVIPPLTRMRALHPGNIPNRDWAWEYTTQ  
7 RAQRPGTMIITEGAFISPQAGGYDNAPGVWSEEQMVWTKIFNAIHEKKSFWVWQLWVL  
8 GWAAFPDNLARDGLRYDSASDNVFMDAEQEAKAKKANNPQHSLTKDEIKQYIKEYVQA  
9 AKNSIAAGADGVEIHSANGYLLNQFLDPHSNTRTDEYGGSIENRARFTLEVVDALVEAIG  
10 HEKVGLRLSPYGVFNSMSGGAETGIVAQYAYVAGELEKRAKAGKRLAFVHLVEPRVTNP  
11 FLTEGEGEYEGGSNDFVYSIWKGPVIRAGNFALHPEVVREEVKDKRTLIGYGRFFISNPD  
12 VDRLEKGLPLNKYDRDTFYQMSAHGYIDYPTYEEALKLGDWKKHHHHHH

### 13 DNA sequence:

14 ATGTCATTTGTA AAAAGATTTTAAGCCACAAGCTTTAGGTGACACCAACCTATTCAAAC  
15 CAATCAAGATCGGGAACAATGAACTTTTGCACCGTGCTGTCATTCCCTCCATTGACCAG  
16 AATGAGAGCTCTTACCCTGGTAATATCCCAAACAGGGACTGGGCAGTCGAATACTA  
17 CACCCAACGTGCTCAAAGACCTGGTACCATGATTATCACTGAAGGTGCCTTCATATCC  
18 CCACAAGCCGGCGGTTACGATAACGCTCCAGGTGTTTGGTCGGAAGAACAATGGTG  
19 GAATGGACCAAAAATCTTCAACGCTATTCATGAAAAGAAATCGTTCGTTTGGGTTCAGT  
20 TATGGGTTTTGGGTTGGGCTGCTTTCCAGACAATCTTGCCAGAGATGGTTTGC GTTA  
21 CGATTCACTTCTGACAACGTTTTTCATGGATGCCGAGCAAGAAGCTAAGGCCAAGAA  
22 GGCCAACAACCCACAACACAGCCTAACCAAGGACGAAATCAAGCAATACATTAAGG  
23 AATACGTCCAGGCTGCCAAGA ACTCTATTGCTGCTGGTGCCGATGGTGTTGAAATTCA  
24 CAGTGCTAACGGT TACTTGTTAAACCAGTTCTTGGACCCTCATTCCAATACTAGAACC  
25 GATGAATATGGTGGATCTATTGAAAACAGAGCTCGTTTACCTTGGAAGTTGTTGATG  
26 CTCTTGTCGAAGCCATTGGTCATGAAAAAGTTGGTTTGAGATTGTCCCCATACGGTGT  
27 TTTCAACAGTATGTCTGGTGGTGCCGAGACCGGCATTGTTGCCCAATATGCTTACGTT

1 GCTGGTGAATTAGAAAAGAGAGCTAAAGCCGAAAACGTTTAGCTTTTGTTCATTTG  
2 GTTGAACCTCGTGTAACCTAACCATTCTTGACTGAAGGGGAGGGTGAATACGAAGGA  
3 GGTAGCAACGATTTTGTTTACTCCATCTGGAAGGGCCCAGTCATTAGAGCTGGTAATT  
4 TTGCTCTCCACCCAGAAGTCGTTAGAGAAGAAGTTAAGGACAAGAGAACCTTGATCG  
5 GTTACGGTAGATTCTTCATTTCTAACCCGGATTTGGTTGATCGTTTGGAAAAAGGTCT  
6 ACCTCTGAACAAATATGACAGAGATACTTTCTACCAGATGTCTGCTCATGGTTATATT  
7 GACTACCCACCTATGAAGAAGCTCTCAAATTAGGCTGGGACAAAAAGCACCACCAT  
8 CACCACCACTGA

9

10 OYE3 (from *Saccharomyces cerevisiae* S288C)

11 Gen Bank: NP\_015154.1

12 Protein sequence:

13 MPFVKGFEPISLRDNLFEPIKIGNTQLAHRAVMPPLTRMRATHPGNIPNKEWAAVYYGQ  
14 RAQRPGTMIITEGTFISPQAGGYDNAPGIWSDEQVAEWKNIFLAIHDCQSFQVWQLWSLG  
15 WASFPDVLARDGLRYDCASDRVYMNATLQEKAKDANNLEHSLTKDDIKQYIKDYIHAA  
16 KNSIAAGADGVEIHSANGYLLNQFLDPHSNKRTDEYGGTIENRARFTLEVVDALJETIGPE  
17 RVGLRLSPYGTFNMSGGAEPGIIAQYSYVLGELEKRAKAGKRLAFVHLVEPRVTDPSLV  
18 EGEGEYSEGTFNDFAYSIWKGPIIRAGNYALHPEVVREQVKDPRTLIGYGRFFISNPDLVYR  
19 LEEGLPLNKYDRSTFYTMSAEGYTDYPTYEEAVDLGWKNKHHHHHHH

20 DNA sequence:

21 ATGCCATTTGTA AAAAGGTTTTGAGCCGATCTCCCTAAGAGACACAAACCTTTTTGAAC  
22 CAATTAAGATTGGTAACACTCAGCTTGACATCGTGCGGTTATGCCCCATTGACCAG  
23 AATGAGGGCCACTCACCCCGAAATATTCAAATAAGGAGTGGGCTGCTGTGTATTA  
24 TGGTCAGCGTGCTCAAAGACCTGGTACCATGATCATCACGGAAGGTACGTTTATTTC  
25 CCTCAAGCCGGCGGCTATGACAACGCCCTGGGATTTGGTCTGATGAGCAGGTCGCT  
26 GAGTGAAGAATATCTTTTAGCCATCCATGATTGTCAGTCGTTTCGCGTGGGTACAAC  
27 TTTGGTCTTTAGGCTGGGCATCCTTCCCAGACGTATTGGCAAGAGACGGGTTACGCTA  
28 TGACTGTGCATCTGACAGAGTGTATATGAATGCTACGTTACAAGAAAAGGCCAAAGA

1 TCGAATAATCTCGAACATAGTTTACTAAAGACGACATTAACAGTATATCAAGGA  
2 TTACATCCATGCGGCTAAGAATTCTATCGCGGCTGGCGCCGATGGTGTAGAAATTCAT  
3 AGCGCCAATGGGTACTTGTGAATCAGTTCTTGGATCCACATTCTAATAAGAGGACCG  
4 ACGAATACGGCGGAACGATCGAAAACAGGGCCCGCTTACACTGGAGGTTGTCGATG  
5 CTCTTATCGAACTATCGGTCCTGAACGGGTGGGTTTGAGGTTGTCGCCGTACGGCAC  
6 TTTTAACAGTATGTCTGGGGGTGCTGAACCAGGTATTATCGCTCAATATTCGTATGTTT  
7 TGGGTGAATTAGAGAAGAGGGCAAAGGCTGGTAAGCGTTTGGCCTTTGTGCACCTCG  
8 TTGAACCACGTGTCACGGACCCATCGTTGGTGGAGGGCGAAGGAGAATATTCGAGG  
9 GTACTAACGATTTTGCCTACTCTATATGGAAGGGTCCAATCATCAGAGCTGGTAATTA  
10 CGCTCTTCATCCAGAAGTGGTTAGAGAACAAGTAAAGGATCCCAGAACCTTGATAGG  
11 CTATGGTAGATTCTTCATCTCTAACCCAGATTTAGTCTACCGTTTAGAAGAGGGCCTG  
12 CCATTGAACAAGTATGACAGAAGTACCTTCTACACCATGTCCGCGGAAGGTTATACC  
13 GACTACCCAACATATGAAGAGGCAGTAGATTTAGGTTGGAACAAGAACCACCACCAT  
14 CACCACCACTGA

15

16 GluER (from *Gluconobacter oxydans*)

17 Gen Bank: WP\_011252080.1

18 Protein sequence:

19 MPTLFDPIDFGPIHAKNRIVMSPLTRGRADKEAVPTPIMA EYYAQRASAGLIITEATGISRE  
20 GLGWPFAPGIWSDAQVEAWKPIVAGVHAKGGKIVCQLWHMGRMVHSSVTGTQPVSSSA  
21 TTAPGEVHTYEGKKPFEQARAIDAADISRILNDYENAARN AIRAGFDGVQIHAANGYLID  
22 EFLRNGTNHRTDEYGGVPENRIRFLKEVTERVIAAIGADRTGVRLSPNGDTQGCIDSAPET  
23 VVFPAAKLLQDLGVAWLELREPGPNGTFGKTDQPKLSPQIRKVFLRPLVLNQDYTFEAAQ  
24 TALAEGKADAIAFGRKFISNPDLPERFARGIALQPDDMKTWYSQGPEGYTDYPSATSGPN  
25 HHHHHH

26 DNA sequence:

27 ATGCCGACCCTTTTCGACCCCATCGATTTCCGGACCTATCCACGCCAAGAATCGTATCG  
28 TCATGTCCCCCTGACTCGCGGTCGCGCTGACAAAGAGGCGGTTCCAACCCCCATTAT

1 GGCTGAATACTACGCCAACGCGCTTCGGCGGGTTTAATTATCACTGAAGCGACGGG  
2 GATTTACGCGAAGGCTTAGGTTGGCCGTTTGCGCCGGGAATTTGGTCCGATGCACAG  
3 GTTGAGGCGTGGAACCTATCGTCGCGGGTGTCCATGCAAAGGGCGGCAAGATCGTA  
4 TGTCAGCTTTGGCATATGGGCCGTATGGTACATTCTTCAGTTACAGGGACGCAGCCCG  
5 TAAGCAGTTCGCCACTACTGCTCCAGGTGAGGTTACACCTATGAGGGCAAGAAGC  
6 CCTTCGAACAAGCGCGTGCAATCGATGCTGCAGACATCTCCCGCATCCTTAACGATTA  
7 CGAAAATGCAGCACGTAATGCAATCCGCGCGGGTTTCGATGGAGTGCAGATCCACGC  
8 AGCCAATGGCTACCTTATCGATGAGTTTTTTCGTAACGGAACCAATCATCGCACCGAT  
9 GAGTATGGGGGGGTGCCGGAACCGTATTCGTTTCTTGAAAGAGGTAACAGAACGC  
10 GTCATCGCGGCGATTGGCGCTGACCGTACGGGTGTGCGTCTGAGTCCAAACGGTGAC  
11 ACACAGGGTTGTATCGACAGTGCTCCCGAAACCGTTTTTGTTCCTGCCGCAAAGCTTT  
12 TGCAAGATTTAGGGGTAGCGTGGCTTGAGCTGCGTGAACCTGGTCCGAATGGTACGT  
13 TTGAAAGACGGATCAACCAAATTATCTCCACAAATCCGTAAGGTATTCCTTCGTCC  
14 ATTGGTCTTAAATCAAGACTATACTTTTGAGGCGGCACAGACGGCCCTGGCTGAGGG  
15 CAAGGCGGACGCTATTGCGTTTGGCCGTAAGTTCATTTCAAATCCAGACTTGCCTGAG  
16 CGCTTTGCCCGTGGCATCGCACTGCAACCAGACGATATGAAAACATGGTACTCCCAA  
17 GGCCAGAGGGTTACACAGACTATCCATCCGCAACTTCTGGGCCGAACCACCACCAT  
18 CACCACCACTGA

19

20 NCR (from *Zymomonas mobile*)

21 Gen Bank: WP\_011241612.1

22 Protein sequence:

23 MPSLFDPIRFGAFTAKNRIWMAPLTRGRATRDHVPTEIMAEYYAQRASAGLIISEATGISQ  
24 EGLGWPYAPGIWSDAQVEAWLPITQAVHDAGGLIFAQLWHMGRMVPSNVSGMQPVAPS  
25 ASQAPGLGHTYDGKKPYDVARALRLDEIPRLDDYEKAARHALKAGFDGVQIHAANGY  
26 LIDEFIRDSTNHRHDEYGGAVENRIRLLKDVTERVIATIGKERTAVRLSPNGEIQGTVDShp  
27 EQVFIPAAKMLSDLDIAFLGMREGAVDGTFGKTDQPKLSPEIRKVF KPPLVLNQDYTFET  
28 AQAALDSGVADAISFGRPFIGNPDLPRRFFEKAPLTKDVIETWYTQTPKGYTDYPLLGDLE  
29 HHHHHH

1 DNA sequence:

2 ATGCCGTCACTGTTCGATCCAATCCGCTTTGGGGCTTTCCTGCAAAAAATCGTATCT  
3 GGATGGCGCCGTTAACACGGGGTTCGGGCAACCCGTGACCATGTCCCAACAGAGATAA  
4 TGGCTGAATACTATGCCCAACGCGCATCCGCGGGCTTGATCATCAGCGAGGCGACCG  
5 GGATCAGCCAAGAGGGCCTGGGCTGGCCCTATGCACCAGGAATCTGGAGTGATGCGC  
6 AGGTCGAGGCATGGTTACCCATAACCCAAGCGGTACACGATGCCGGAGGTTTGATAT  
7 TTGCACAACCTGTGGCACATGGGGCGTATGGTGCCTTCCAACGTTTCTGGAATGCAACC  
8 TGTCGCACCTAGCGCTTCAACAAGCGCCCGGCTTGGGCCATACTTATGATGGCAAAAA  
9 GCCATACGATGTAGCCAGAGCATTGAGACTTGACGAGATCCCACGGCTGCTGGACGA  
10 CTATGAAAAGGCAGCTCGGCACGCACTGAAAGCTGGGTTCGATGGAGTTCAGATTCA  
11 TGCTGCCAACGGATACCTGATTGACGAGTTCATCCGGGATTCAACAAATCATAGACA  
12 CGACGAATACGGGGGGGCGGTTGAGAACAGAATACGGTTATTGAAGGATGTCACTGA  
13 GCGGGTTATCGCAACCATCGGAAAGGAGCGCACAGCAGTGCGTTTAAGTCCGAATGG  
14 AGAGATAACAAGGCACAGTAGACTCGCATCCAGAACAGGTATTTATCCCGGCTGCAAA  
15 GATGTTATCTGATTTAGATATCGCGTTCCTTGGGATGCGCGAGGGTGCTGTAGACGGG  
16 ACATTTGGCAAAACAGACCAGCCCAAACCTTCGCCCAGATCCGTAAAGTTTTCAAG  
17 CCACCCCTTGTTCTGAATCAAGATTACACTTTCGAGACTGCCCAGGCTGCGTTAGATT  
18 CGGGTGTAGCCGATGCAATCAGTTTTGGTCGTCCATTTCATTGGAATCCCGACTTACC  
19 GAGAAGATTCTTTGAAAAGGCACCGTTAACTAAGGACGTAATTGAGACTTGGTACAC  
20 TCAGACTCCCAAAGGTTACACCGACTATCCACTGTTAGGTGATCTCGAGCACCACCAT  
21 CACCACCACTGA

22 **1.2 Materials and analytical methods**

23 All chemicals and reagents were purchased from Okinno, Aladdin and Tansoole.  
24 Chemicals were obtained from authentic suppliers at least of reagent grade and used  
25 without further purification. All biological reagents are purchased from Fisher  
26 Scientific, Solarbio (Beijing, China) and Sangon Biotech (Shanghai, China). The  
27 recombinant plasmids, pET-22B-GluER, pET-22B-NCR, pET-28a(+)-OYE1, pET-  
28 28a(+)-OYE3, respectively, containing the gene of GluER (from *Gluconobacter*

1 *oxydans*, GenBank: WP\_011252080.1)/ NCR (from *Zymomonas mobile*, GenBank:  
2 WP\_011241612.1)/ OYE1 (from *Saccharomyces pastorianus*, GenBank:  
3 CP049012.1)/ OYE3 (from *Saccharomyces cerevisiae* S288C, GenBank:  
4 NM\_001183985.1), were provided by Hunan Keai Medical Equipment Co., Ltd. and  
5 Beijing Qingke Biotechnology Co., Ltd. The competent cells BL21 (DE3) and Rosetta  
6 (DE3) were provided by Beijing Solarbio Technology Co., Ltd. The *Escherichia coli*  
7 strain containing the glucose dehydrogenase (GDH) gene was provided by Wu  
8 Zhongliu researcher's group from Chengdu Institute of Biology, Chinese Academy of  
9 Sciences. Racemic product standards were synthesized based on previous studies.<sup>1,2</sup>  
10 NMR spectra were obtained by an Agilent 400-MR DD2 spectrometer (400 MHz).  
11 The chemical shifts (ppm) were recorded with respect to TMS in CDCl<sub>3</sub> or DMSO-d<sub>6</sub>.  
12 Analytical high-performance liquid chromatography (HPLC) was carried out using an  
13 Agilent 1260 Infinity instrument equipped with ChiralCel® OD-3 chiral columns  
14 (4.6×250 mm, 3 μm), ChiralPak® IH chiral columns (4.6×250 mm, 5 μm),  
15 ChiralCel® OJ chiral columns (4.6×250 mm, 10 μm), isopropanol and hexane were  
16 used as an isocratic mobile phase system. The temperature was set at 30 °C.

## 17 **2 Expression and purification of ene reductase**

### 18 **2.1 Methods**

19 The expression and purification of ERs referred to our previous work. The  
20 recombinant plasmids were transformed into *E. coli* BL21(DE3) or Rosetta(DE3)  
21 competent cells and selected on Luria–Bertani (LB) agar plates containing 100 μg/mL  
22 kanamycin or ampicillin. Single colonies were grown overnight at 37 °C in LB  
23 medium containing 100 μg/mL kanamycin or ampicillin. The overnight culture was  
24 then inoculated into Terrific-broth (TB) medium containing 100 μg/mL kanamycin or  
25 ampicillin. Isopropyl-beta-D-thiogalactopyranoside (IPTG) was added to a final  
26 concentration of 0.5 mM when OD<sub>600</sub> of the culture reached 0.6-0.8, and the  
27 cultivation was continued at 20-28 °C for 18-22 h. Cells were harvested by

1 centrifugation at 4000 rpm for 10 min at 4 °C, washed with phosphate buffered saline  
2 (PBS). After disruption with an ultrasonic cell disruptor (SCIENTZ-IID, SCIENTZ  
3 Inc., China), the cell debris was removed by centrifugation at 12000 rpm for 30 min at  
4 4 °C. The obtained supernatant was first filtered using a 0.45 µm aqueous needle filter  
5 and then loaded onto Ni<sup>2+</sup>-nitrilotriacetic acid column (Bio-Rad, USA) equilibrated  
6 with buffer A. The enzyme was eluted with buffer A containing a gradient of  
7 imidazole from 10 to 250 mM at a flow rate of 1 mL/min, and five column volumes  
8 were used for the gradient elution. The fractions containing the target protein were  
9 collected and dialyzed against 10 mM PBS (pH 7.2-7.4). Purified enzymes were  
10 analyzed by SDS-PAGE and used for enzymatic assays. Protein estimations were  
11 carried out with the Bradford method with bovine serum albumin as a standard.

## 12 2.2 SDS-PAGE of crude and purified enzymes

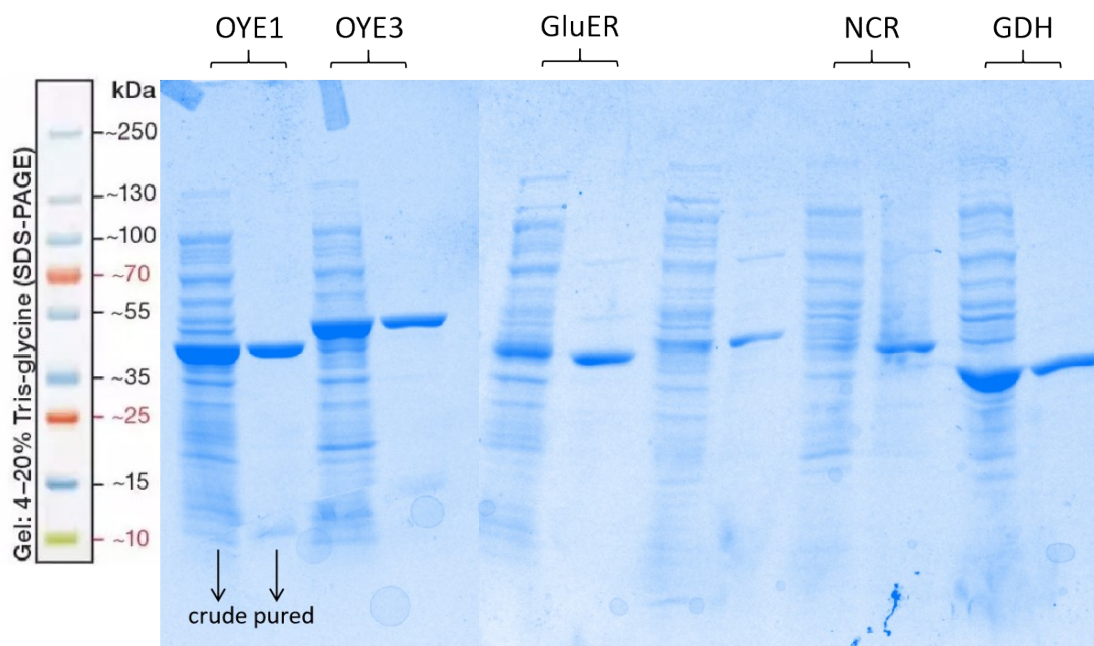

13  
14  
15

**Fig. S1** SDS-PAGE of crude and purified enzymes



## 1 **3 Experimental Procedures**

### 2 **3.1 General procedures for photoenzymatic synthesis of malononitrile alkylated** 3 **derivatives**

4 1) 1mL reaction system contains acetophenone (0.20 mmol), malononitrile (0.40  
5 mmol), MO (8 mol%), 10 %v/v ethanol and H<sub>2</sub>O. The mixture is stirred in a quartz  
6 tube irradiated by white light (36 W) at room temperature in air for 36 h.

7 2) After turning off the light source, DMSO (2 mL) is added and dissolved  
8 uniformly under ultrasound. Then take 300  $\mu$ L system into a new conical flask, which  
9 contains NCR (0.4 mg/mL), GDH (0.5 mg/mL), NADP<sup>+</sup> (0.1 mM), glucose (20 mM),  
10 PBS (10 mM, pH 7.2-7.4), with a final volume of 2 mL. The enzymatic reaction is  
11 carried out in a constant temperature shaker, 32 °C, 200 rpm, 50 min. Yield and  
12 enantiomeric excess (ee) values were determined by chiral HPLC.

### 13 **3.2 Docking models**

14 Automated docking models were obtained using Autodock1.5.7, OYE1  
15 (PDB:3TX9), OYE3 (PDB:5V4V), NCR (PDB:4A3U) were used as receptors and  
16 prepared using Autodock Tools. The ligand structures were prepared by GaussView  
17 6.0, and the energy minimizations of ligand structures were carried out in Chem3D.

### 18 **3.3 Molecular dynamics simulation**

19 Molecular dynamics simulation was performed using GROMACS, a widely used  
20 software package for simulating the behavior of biomolecules. The parameters of the  
21 substrate 2-(1-phenylethylidene)malononitrile and coenzyme FMN in the MD process  
22 were generated by the combination of Antechamber tool with the GAFF force field,  
23 which is an extensively used force field for small organic molecules. Amber 99sb-ildn  
24 was chosen as the protein force field, which is a frequently used force field for  
25 simulating proteins.

1 To simulate the behavior of the protein substrate complex in a solvent  
2 environment, the complex was embedded into a triclinic box with a boundary distance  
3 of 0.8 nm from the protein surface. The protein and the substrate were immersed in a  
4 rectangular box of TIP3P water.

5 The complete OYE1 system ultimately contained 65192 atoms, while the OYE3  
6 system contained 54560 atoms. After a series of pre-treatments, such as balancing  
7 charges, the two systems underwent energy minimization of 1000 steps, using the  
8 conjugate gradient method, followed by NPT simulations of 100 ps with the  
9 Berendsen method. The Berendsen method is a commonly used method for  
10 controlling the temperature and pressure of a simulation system. Molecular dynamics  
11 simulations of 100 ns were conducted for both systems, which allowed for the  
12 investigation of the dynamic behavior of the protein substrate complex over a long  
13 time scale.

#### 14 3.4 Optimization of photocatalytic reaction conditions

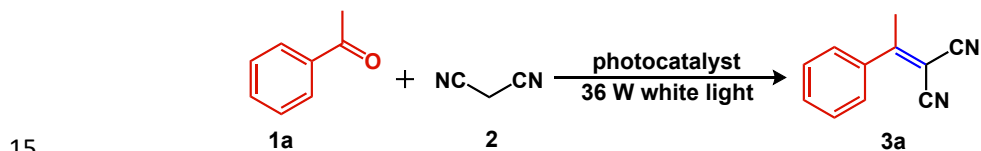

16 **Table S1** Screening of photosensitizers and loadings <sup>a</sup>

| Entry | Photosensitizer | Photosensitizer Loading (mol%) | Yield(%) <sup>b</sup> |
|-------|-----------------|--------------------------------|-----------------------|
| 1     | Rose Bengal     | 2                              | 32.9                  |
| 2     | Erythrosine B   | 2                              | 29.8                  |
| 3     | Eosin Y         | 2                              | 37.8                  |
| 4     | Crystal Violet  | 2                              | 12.4                  |
| 5     | Phloxine B      | 2                              | 38.4                  |
| 6     | Methyl Orange   | 2                              | 48.6                  |
| 7     |                 | 1                              | 44.3                  |
| 8     |                 | 4                              | 50.9                  |
| 9     | Methyl Orange   | 8                              | 63.3                  |
| 10    |                 | 12                             | 47.4                  |

1 <sup>a</sup> Reaction condition: **1a** (0.24 mmol), **2** (0.48 mmol), photosensitizer (x mol%), H<sub>2</sub>O, total  
2 reaction volume 1 mL, 24 h, 36 W white light. <sup>b</sup> Yield determined by HPLC analysis with **3a**  
3 sample.

4

5 **Table S2** Screening of co-solvents <sup>a</sup>

| Entry | Cosolvent     | Yield(%) <sup>b</sup> |
|-------|---------------|-----------------------|
| 1     | Dioxane       | 63.1                  |
| 2     | EtOH          | <b>80.6</b>           |
| 3     | MeCN          | 62.8                  |
| 4     | Ethyl Acetate | 43.3                  |
| 5     | DMSO          | 49.9                  |
| 6     | THF           | 51.5                  |

6 <sup>a</sup> Reaction condition: **1a** (0.24 mmol), **2** (0.48 mmol), MO (8 mol%), H<sub>2</sub>O, co-solvent (10 % v/v),  
7 total reaction volume 1 mL, 24 h, 36 W white light. <sup>b</sup> Yield determined by HPLC analysis with **3a**  
8 sample.

9

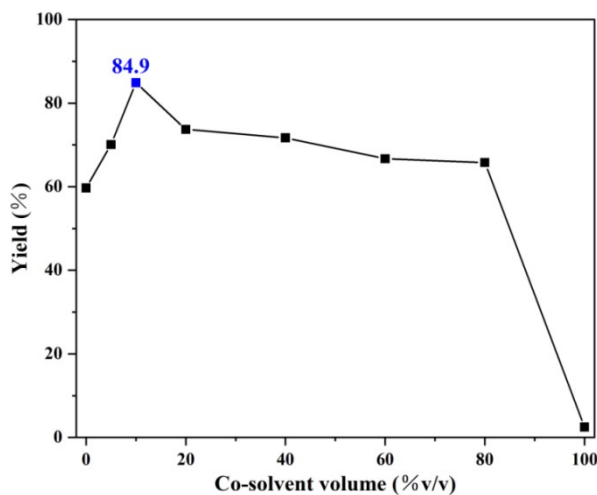

10

11 **Fig. S2** Screening of co-solvent (EtOH) volume. Reaction condition: **1a** (0.20 mmol), **2** (0.40  
12 mmol), MO (8 mol%), EtOH (x % v/v), H<sub>2</sub>O, total reaction volume 1 mL, 36 h, 36 W white light.  
13 Yield determined by HPLC analysis with **3a** sample.

14

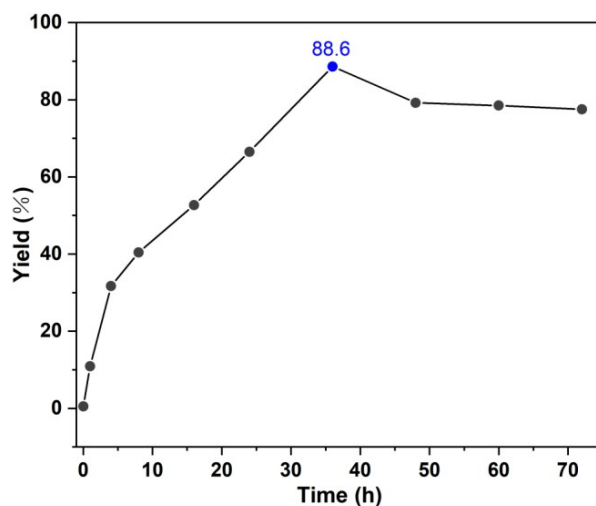

1

2 **Fig. S3** Photoreaction time curve. Reaction condition: **1a** (0.24 mmol), **2** (0.48 mmol), MO (8  
 3 mol%), H<sub>2</sub>O (900 μL), ethanol (100 μL), 36 W white light. Yield determined by HPLC analysis  
 4 with **3a** sample.

5

6 **Table S3** Control experiments <sup>a</sup>

| Entry | Deviation from standard conditions | Yield (%) <sup>b</sup> |
|-------|------------------------------------|------------------------|
| 1     | None                               | 48.6                   |
| 2     | Without photocatalyst              | 28.4                   |
| 3     | Without photocatalyst <sup>c</sup> | 32.0                   |
| 4     | Without light                      | 29.3                   |
| 5     | Without photocatalyst and light    | 22.3                   |

7 <sup>a</sup> Reaction condition: **1a** (0.24 mmol), **2** (0.48 mmol), MO (2 mol%), H<sub>2</sub>O, total reaction volume 1

8 mL, 24 h, 36 W white light. <sup>b</sup>Yield determined by HPLC analysis with **3a** sample. <sup>c</sup> 46 hours

9

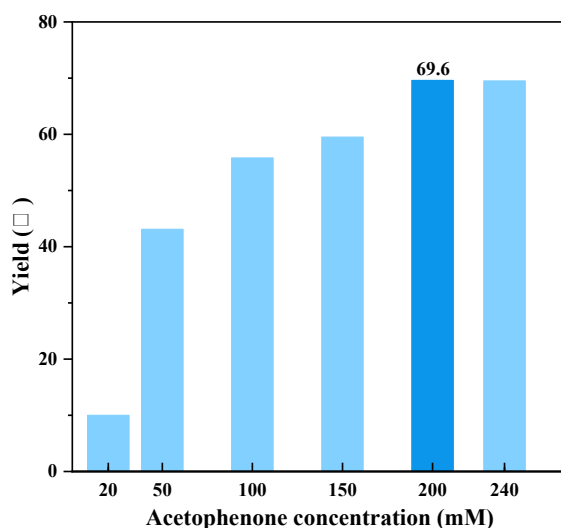

1

2 **Fig. S4** Screening of acetophenone concentration (maintain acetophenone to malononitrile=1:2).

3 Reaction condition: **1a** (1.0 eq.), **2** (2.0 eq.), MO (8 mol%), EtOH (10 % v/v), H<sub>2</sub>O, total reaction  
4 volume 1 mL, 36 h, 36 W white light. Yield determined by HPLC analysis with **3a** sample.

5 High concentration of organic substrates can disrupt the three-dimensional  
6 structure of enzyme proteins, thus, we investigated the effect of substrate  
7 concentration on yield (with acetophenone concentration as the standard, the molar  
8 ratio of acetophenone to malononitrile maintained at 1:2). As the substrate  
9 concentration decreased, the yield significantly decreased. To ensure a high yield of  
10 the photocatalytic reaction and take into account the damage of high-concentration  
11 substrates to the enzymes, we chose 200 mM acetophenone as the optimal substrate  
12 concentration.

13

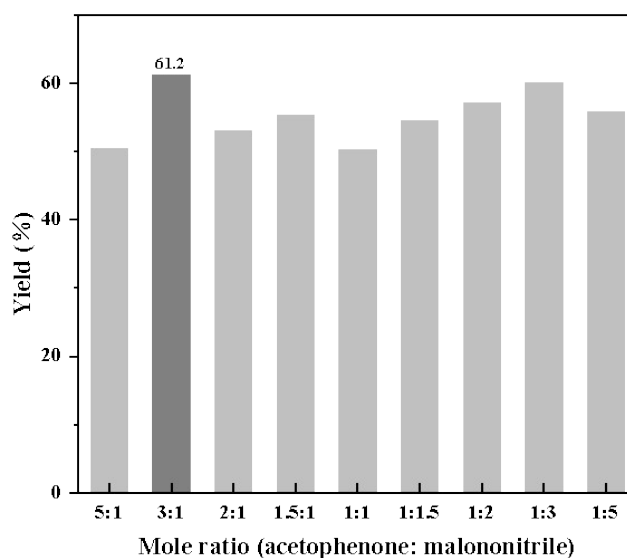

14

1 **Fig. S5** Screening of substrate molar ratio. Reaction condition: **1a** (0.24 mmol), **2**, MO (8 mol%),  
2 EtOH (10 % v/v), H<sub>2</sub>O, total reaction volume 1 mL, 36 h, 36 W white light. Yield determined by  
3 HPLC analysis with **3a** sample.

4 The molar ratio of substrates may affect the equilibrium of the reaction and the  
5 selectivity of the product, therefore, we investigated the effect of substrate molar ratio  
6 (acetophenone: malononitrile) on yield. Varying the molar ratio (acetophenone:  
7 malononitrile) from 5:1 to 1:5 had little contribution to betterment. So we still used  
8 acetophenone: malononitrile=1:2 as the optimal reaction condition.

9

10 **Table S4** Screening of wavelength <sup>a</sup>

| Entry | Wavelength (nm) | Yield (%) <sup>b</sup> |
|-------|-----------------|------------------------|
| 1     | 385             | 55.3                   |
| 2     | 410             | 63.0                   |
| 3     | 460             | 57.6                   |
| 4     | White light     | <b>85.6</b>            |
| 5     | Dark            | 31.5                   |

11 <sup>a</sup> Reaction condition: **1a** (0.20 mmol), **2** (0.40 mmol), MO (8 mol%), H<sub>2</sub>O (900 μL), EtOH (100  
12 μL), 36 h, 36 W. <sup>b</sup> Yield determined by HPLC analysis with **3a** sample.

13

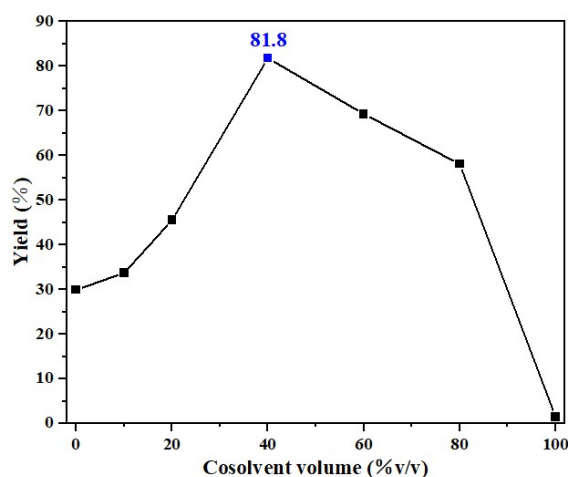

14

15 **Fig. S6** Screening of co-solvent (EtOH) volume. Reaction condition: **1c** (0.20 mmol), **2** (0.40  
16 mmol), MO (8 mol%), EtOH (x % v/v), H<sub>2</sub>O, total reaction volume 1 mL, 36 h, 36 W white light.  
17 Yield determined by HPLC analysis with **3c** sample.

1

## 2 3.5 Optimization of photoenzymatic reaction conditions

3 **Table S5** Screening of dilution ratio<sup>a</sup>

4

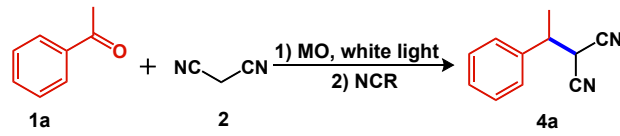

5

| Entry | Final substrate concentration (mM) | Yield (%) <sup>b</sup> | ee (%) <sup>b</sup> |
|-------|------------------------------------|------------------------|---------------------|
| 1     | 10                                 | 50.2                   | 98.3                |
| 2     | 20                                 | 25.4                   | 99.4                |
| 3     | 30                                 | 19.9                   | 98.4                |
| 4     | 40                                 | 14.9                   | 96.5                |
| 5     | 50                                 | 15.1                   | 92.4                |

6 <sup>a</sup> Reaction condition: **1a** (0.20 mmol), **2** (0.40 mmol), MO (8 mol%), H<sub>2</sub>O (900 μL), EtOH (100  
7 μL), 36 h, 36 W white light. Then added crude NCR (0.4 mg/mL), GDH (0.5 mg/mL), Glucose  
8 (20 mM), NADP<sup>+</sup> (0.1 mM), DMSO (10 % v/v) and diluted to different multiples with PBS (0.01  
9 M, pH 7.2-7.4), 37 °C, 20 h. <sup>b</sup> Yield and ee value were determined by Chiral HPLC analysis with  
10 racemic **4a** sample.

11 After determining the optimal enzyme catalyst, we attempted two tandem  
12 strategies: 1) adding all components to the system and conducting both photocatalytic  
13 and enzymatic reactions simultaneously; 2) conducting the photoreaction first,  
14 followed by adding ERs and cofactor cycling systems for enzymatic reaction.  
15 Unfortunately, neither strategy was feasible, due to the disruption of enzymes by high  
16 concentrations of substrates. However, a decrease in substrate concentration  
17 significantly reduced the yield of olefin intermediates (Fig. S4). Therefore, we  
18 propose a dilution strategy to cascade photoreaction and enzyme reaction. After the  
19 photo reaction is completed, dilute the reaction system and add the required  
20 components for enzyme catalysis for enzymatic reaction. This strategy reduces the  
21 damage of high-concentration substrates to enzymes while maintaining a high

1 photoreaction yield. The results showed that the higher the dilution ratio, the higher  
2 the yield of enzyme-catalyzed reactions (Table S5). However, excessive dilution  
3 increases production costs and makes post-processing operations more complex.  
4 Therefore, we chose a final substrate concentration of 10 mM to achieve photo-  
5 enzymatic cascade catalysis.

6

7 **Table S6** Comparing the catalytic effects of purified enzymes, crude enzymes, and whole cell <sup>a</sup>

| Entry | Enzyme (0.3 mg)  | Yield (%) <sup>b</sup> |
|-------|------------------|------------------------|
| 1     | Whole cells      | 34.0                   |
| 2     | Crude enzymes    | 51.6                   |
| 3     | Purified enzymes | 48.8                   |

8 <sup>a</sup> Reaction condition: **1a** (0.20 mmol), **2** (0.40 mmol), MO (8 mol%), H<sub>2</sub>O (900 μL), EtOH (100  
9 μL), 36 h, 36 W white light. Then added NCR (20 mg), GDH (0.618 mg), Glucose (72.2 mg),  
10 NADP<sup>+</sup> (0.001 mmol), DMSO (10 % v/v) and dilute the system to 20 mL with PBS (0.01 M, pH  
11 7.2-7.4), 37 °C, 24 h. <sup>b</sup> Yield determined by Chiral HPLC analysis.

12

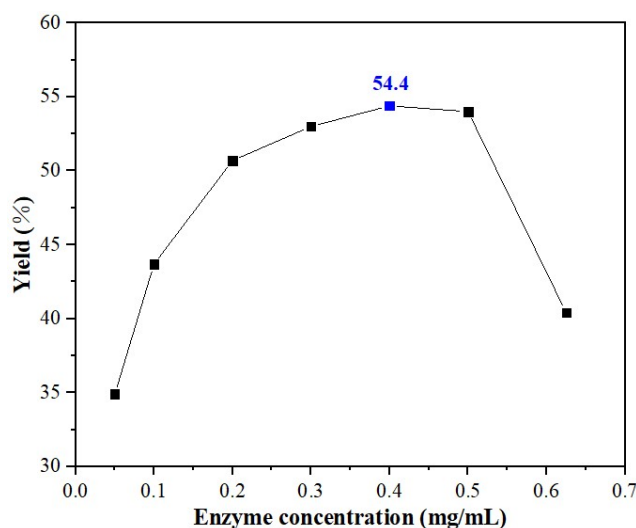

13

14 **Fig. S7** Screening of enzyme concentration. Reaction condition: **1a** (0.20 mmol), **2** (0.40 mmol),  
15 MO (8 mol%), H<sub>2</sub>O (900 μL), EtOH (100 μL), 36 h, 36 W white light. Then 100 μL of the  
16 reaction system was added crude NCR, GDH (0.3 mg), Glucose (20 mM), NADP<sup>+</sup> (0.1 mM),  
17 DMSO (10 % v/v) and diluted to 2 mL with PBS (0.01 M, pH 7.2-7.4), 37 °C, 20 h. Yield  
18 determined by HPLC analysis.



1

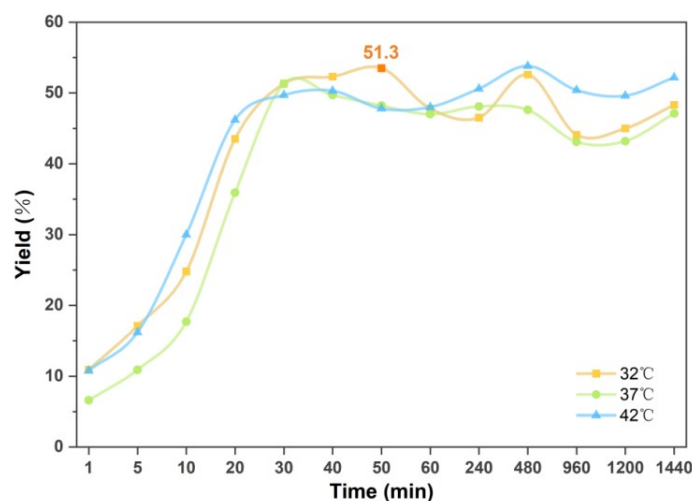

2

3 **Fig. S8** Time-temperature curve. Reaction conditions: **1a** (0.20 mmol), **2** (0.40 mmol), MO (8  
 4 mol%), H<sub>2</sub>O (900 μL), EtOH (100 μL), 36 h, 36 W white light. Then 100 μL of the reaction  
 5 system was added crude NCR (0.4 mg/mL), GDH (0.5 mg/mL), Glucose (20 mM), NADP<sup>+</sup> (0.1  
 6 mM), DMSO (10 % v/v) and diluted to 2 mL with phosphate buffer (0.01 M, pH 7.2-7.4), 160 rpm.  
 7 Yield determined by Chiral HPLC analysis with **4a** sample.

8

9 **Table S7** Screening of buffer <sup>a</sup>

| Entry | Buffer   | Yield (%) <sup>b</sup> |
|-------|----------|------------------------|
| 1     | PBS      | 55.2                   |
| 2     | MOPS     | 65.7                   |
| 3     | Tris-HCl | 65.5                   |
| 4     | Tricine  | 64.2                   |
| 5     | TEOA     | <b>68.0</b>            |

10 <sup>a</sup> Reaction condition: **1a** (0.20 mmol), **2** (0.40 mmol), MO (8 mol%), H<sub>2</sub>O (900 μL), EtOH (100  
 11 μL), 36 h, 36 W white light. Then 100 μL of the reaction system was added crude NCR (0.4  
 12 mg/mL), GDH (0.5 mg/mL), Glucose (20 mM), NADP<sup>+</sup> (0.1 mM), DMSO (10 % v/v) and diluted  
 13 to 2 mL with buffer (0.01 M, pH 7.2-7.4), 32 °C, 200 rpm, 50 min. <sup>b</sup> Yield was determined by  
 14 Chiral HPLC analysis with racemic product samples.

15

16 **Table S8** Screening of pH <sup>a</sup>

| Entry | pH      | Yield (%) <sup>b</sup> | ee (%) <sup>b</sup> |
|-------|---------|------------------------|---------------------|
| 1     | 5.5     | 66.8                   | 83.0                |
| 2     | 6.5     | 65.5                   | 82.2                |
| 3     | 7.2-7.4 | <b>66.6</b>            | <b>97.7</b>         |
| 4     | 8.5     | 66.0                   | 97.6                |
| 5     | 9.5     | 64.6                   | 97.8                |

1 <sup>a</sup> Reaction condition: **1a** (0.20 mmol), **2** (0.40 mmol), MO (8 mol%), H<sub>2</sub>O (900 μL), EtOH (100  
2 μL), 36 h, 36 W white light. Then 100 μL of the reaction system was added crude NCR (0.4  
3 mg/mL), GDH (0.5 mg/mL), Glucose (20 mM), NADP<sup>+</sup> (0.1 mM), DMSO (10 % v/v) and diluted  
4 to 2 mL with TEOA buffer (0.01 M), 32 °C, 200 rpm, 50 min. <sup>b</sup> Yield and ee value determined by  
5 Chiral HPLC analysis with racemic product samples.

6

7 **Table S9** Screening of co-solvent <sup>a</sup>

| Entry | Co-solvent       | Yield (%) <sup>b</sup> |
|-------|------------------|------------------------|
| 1     | DMSO             | <b>70.6</b>            |
| 2     | ACN              | 65.7                   |
| 3     | EtOH             | 59.2                   |
| 4     | IPA              | 65.7                   |
| 5     | THF              | 63.4                   |
| 6     | H <sub>2</sub> O | 45.2                   |

8 <sup>a</sup> Reaction condition: **1a** (0.20 mmol), **2** (0.40 mmol), MO (8 mol%), H<sub>2</sub>O (900 μL), EtOH (100  
9 μL), 36 h, 36 W white light. Then 100 μL of the reaction system was added crude NCR (0.4  
10 mg/mL), GDH (0.5 mg/mL), Glucose (20 mM), NADP<sup>+</sup> (0.1 mM), co-solvent (10 % v/v) and  
11 diluted to 2 mL with TEOA buffer (0.01 M, pH 7.2-7.4), 32 °C, 200 rpm, 50 min. <sup>b</sup> Yield  
12 determined by Chiral HPLC analysis with racemic product samples.

13

### 1 3.6 Enzyme kinetics

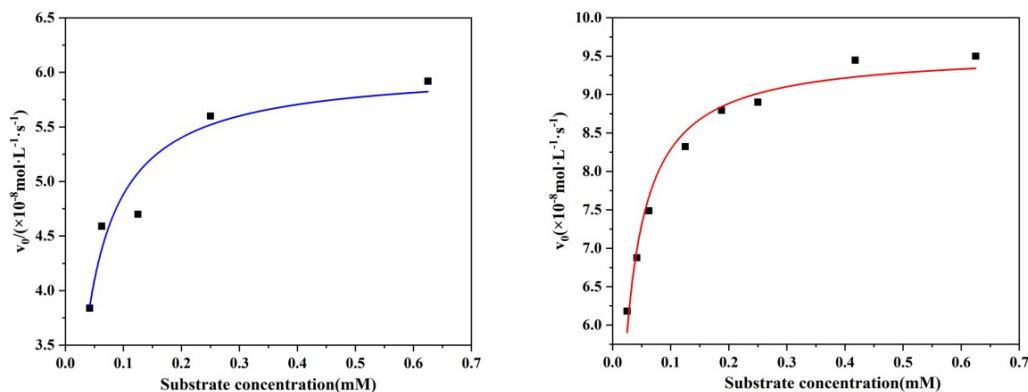

3 **Fig. S9** Enzymatic reaction kinetics curves of OYE1-3a (left) and NCR-3a (right). Reaction  
4 condition: 1c (0.025-2.5 mM) , NADPH (0.25 mM), PBS (10 mM, pH 7.2-7.4), purified enzymes  
5 (20  $\mu$ g), total reaction volume 200  $\mu$ L. Measured the change in absorbance value at 340 nm.

### 6 3.7 Gene sequence comparison

7 Use DNAMAN and DNASTAR bioinformatics software for analysis. Based on the  
8 sequence comparison results (Fig. S10), we found that the gene sequences of OYE1  
9 and OYE3 have a high consistency of 80.25%, and the amino acids at the active sites  
10 are highly conserved (only different in the 296 position). The sequence consistency  
11 between GluER and NCR reached 67.85%, and the amino acids at the active sites also  
12 showed high conservatism. The yellow highlighted amino acids are identified as  
13 active site amino acids in the literature <sup>3</sup>.

|           |                         |                          |                         |                          |                         |
|-----------|-------------------------|--------------------------|-------------------------|--------------------------|-------------------------|
| GluER.pro | .....HHH                | HHHMPFLFDP               | IDFGPIHAKN              | RIVMSPLTRG               | RADKEAVP..              |
| NCR.pro   | .....                   | ...MPSLFD                | IRFGAFTAKN              | RIWMAPLTRG               | RATRDHVP..              |
| OYE1.pro  | MSFVKDFKPQ              | ALGDTNLFKP               | IKIGNNELLH              | RAVIPPLTRM               | RALHPGNIPN              |
| OYE3.pro  | MPFVKGFPEI              | SLRDTNLFEP               | IKIGNTQLAH              | RAVMPPLTRM               | RATHPGNIPN              |
|           |                         |                          |                         |                          |                         |
| GluER.pro | TPIMAEYYAQ              | RASAG..LII               | TEATGISREG              | LGWPFAPGIW               | SDAQVEAWKP              |
| NCR.pro   | TEIMAEYYAQ              | RASAG..LII               | SEATGISQEG              | LGW <sup>Y</sup> PYAPGIW | SDAQVEAWLP              |
| OYE1.pro  | RDWAVEYYTQ              | RAQRPGTMII               | TEGAFISPQA              | GGYDNAPGVW               | SEEQMVEWTK              |
| OYE3.pro  | KEWAAVYYGQ              | RAQRPGTMII               | TEGTFISPQA              | GGYDNAPGIW               | SDEQVAEWKN              |
|           |                         |                          |                         |                          |                         |
| GluER.pro | IVAGVHAKGG              | KIVCQLWHMG               | RMVH...SSV              | TGTQPVSSSA               | TTAPGEVHTY              |
| NCR.pro   | ITQAVHDAGG              | LIFAQLWHMG               | RMVP...SNV              | SGMQPVAPSA               | SQAPGLGHTY              |
| OYE1.pro  | IFNAIHEKKS              | FVWVQLWVLG               | WAAFDPDLAR              | DGLRYDSASD               | NVFMDAEQEA              |
| OYE3.pro  | IFLAIHDCQS              | FAWVQLW <sup>Y</sup> SLG | WASFPDVLAR              | DGLRYDCASD               | RVYMNATLQE              |
|           |                         |                          |                         |                          |                         |
| GluER.pro | EGKK.....               | PFEQARAIDA               | ADISRILNDY              | ENAARNAIRA               | GFDGVQIHAA              |
| NCR.pro   | DGKK.....               | PYDVARALRL               | DEIPRLDDY               | EKAARHALKA               | GFDGVQIHAA              |
| OYE1.pro  | KAKK.....               | ANNPQHSLTK               | DEIKQYIKEY              | VQAAKNSIAA               | GADGVEIHSA              |
| OYE3.pro  | KAKD.....               | ANNLEHSLTK               | DDIKQYIKDY              | IHAACKNSIAA              | GADGVEIHSA              |
|           |                         |                          |                         |                          |                         |
| GluER.pro | NGYLIDFLR               | NGTNHRTDEY               | GGVPENRIRF              | LKEVTERVIA               | AIGADRTGVR              |
| NCR.pro   | NGYLIDFIR               | DSTNHRHDEY               | GGAVENRIRL              | LKDVERTVIA               | TIGKERTAVR              |
| OYE1.pro  | NGYLLNQFLD              | PHSNTRTDEY               | GGSIENRARF              | TLEVVDALVE               | AIGHEKVGLR              |
| OYE3.pro  | NGYLLNQFLD              | PHSNKRTDEY               | GGTIENRARF              | TLEVVDALIE               | TIGPERVGLR              |
|           |                         |                          |                         |                          |                         |
| GluER.pro | LSPNG.....              | .....                    | ...DTQGCID              | SAPETVFVPA               | AKLLQDLGVA              |
| NCR.pro   | LSPNG.....              | .....                    | ...EI <sup>Q</sup> GTVD | SHPEQVFIPA               | AKMLSDLDIA              |
| OYE1.pro  | LSPYGVFNSM              | SGGAETGIVA               | QYAYVAGELE              | KRAKAGKRLA               | FVHLVEPRVT              |
| OYE3.pro  | LSPYGT <sup>F</sup> NSM | SGGAEPGIIA               | QYSYVLGELE              | KRAKAGKRLA               | FVHLVEPRVT              |
|           |                         |                          |                         |                          |                         |
| GluER.pro | WLELREPGPN              | GTFGKTDQPK               | LSPQIRKVFL              | RPLVLNQDYT               | FEAAQTALAE              |
| NCR.pro   | FLGMREGAVD              | GT <sup>F</sup> GKTDQPK  | LSPEIRKVFK              | PPLVLNQDYT               | FETAQAALDS              |
| OYE1.pro  | NPFLTEGEGE              | YEGGSNDFVY               | SIWKGPIIRA              | GNFALHPEVV               | REEVK...DK              |
| OYE3.pro  | DPSLVEGEGE              | YSEGTNDFAY               | SIWKGPIIRA              | GNYALHPEVV               | REQVK...DP              |
|           |                         |                          |                         |                          |                         |
| GluER.pro | GKADAIAFGR              | KFISNPDLPE               | RFARGIALQP              | DDMKTWYSQG               | PEGYTDYPSA              |
| NCR.pro   | GVADAI <sup>S</sup> FGR | PFIGNPDLPR               | RFFEKAPLTK              | DVIETWYTQT               | PKG <sup>Y</sup> TDYPLL |
| OYE1.pro  | ..RTLIGYGR              | FFISNPDLVD               | RLEKGLPLNK              | YDRDTFYQMS               | AHGYIDYPTY              |
| OYE3.pro  | ..RTLIGYGR              | FFISNPDLVY               | RLEEGLPLNK              | YDRSTFY <sup>T</sup> MS  | AEGYTDYPTY              |
|           |                         |                          |                         |                          |                         |
| GluER.pro | TSGPN.....              | .....                    |                         |                          |                         |
| NCR.pro   | GD.....                 | .....                    |                         |                          |                         |
| OYE1.pro  | EEALKLGWDK              | K.....                   |                         |                          |                         |
| OYE3.pro  | EEAVDLGWNK              | N.....                   |                         |                          |                         |

1

2

**Fig. S10** Sequence comparison results

3

## 1 4 Chiral HPLC data for enantiomers and reaction systems

| No. | product | Column | Solvent system<br>(hexane/i-PrOH) | Flow rate<br>(mL/min) | Detection<br>wavelength | Retention<br>times        |
|-----|---------|--------|-----------------------------------|-----------------------|-------------------------|---------------------------|
| 1   | 4a      | OD-3   | 90:10                             | 1.0                   | 210 nm                  | 15.789 min;<br>19.492 min |
| 2   | 4b      | OJ     | 80:20                             | 1.0                   | 210 nm                  | 9.746 min;<br>11.219 min  |
| 3   | 4c      | OJ     | 80:20                             | 1.0                   | 210 nm                  | 8.076 min;<br>9.058 min   |
| 4   | 4d      | OD-3   | 93:7                              | 1.0                   | 210 nm                  | 15.588 min;<br>18.444 min |
| 5   | 4e      | IH     | 95:5                              | 1.0                   | 210 nm                  | 15.235 min;<br>16.334 min |
| 6   | 4f      | OJ     | 80:20                             | 1.0                   | 210 nm                  | 10.162 min;<br>11.630 min |
| 7   | 4g      | IH     | 90:10                             | 1.0                   | 210 nm                  | 14.495 min;<br>16.270 min |
| 8   | 4h      | OJ     | 98:2                              | 1.0                   | 220 nm                  | 30.419 min;<br>32.769 min |
| 9   | 4i      | OD-3   | 90:10                             | 1.0                   | 210 nm                  | 18.253 min;<br>19.268 min |
| 10  | 4j      | OD-3   | 90:10                             | 1.0                   | 220 nm                  | 19.508 min;<br>20.996 min |
| 11  | 4k      | IH     | 95:5                              | 1.0                   | 210 nm                  | 18.752 min;<br>20.405 min |
| 12  | 4l      | OD-3   | 95:5                              | 1.0                   | 210 nm                  | 24.082 min;<br>26.926 min |
| 13  | 4m      | IH     | 90:10                             | 1.0                   | 210 nm                  | 21.653 min;<br>24.289 min |
| 14  | 4n      | OJ     | 80:20                             | 1.0                   | 220 nm                  | 14.996 min;<br>18.683 min |
| 15  | 4o      | IH     | 99:1                              | 1.0                   | 210 nm                  | 18.538 min;<br>19.841 min |

2

3

4

5

6

7

1 HPLC trace of *rac-4a*:

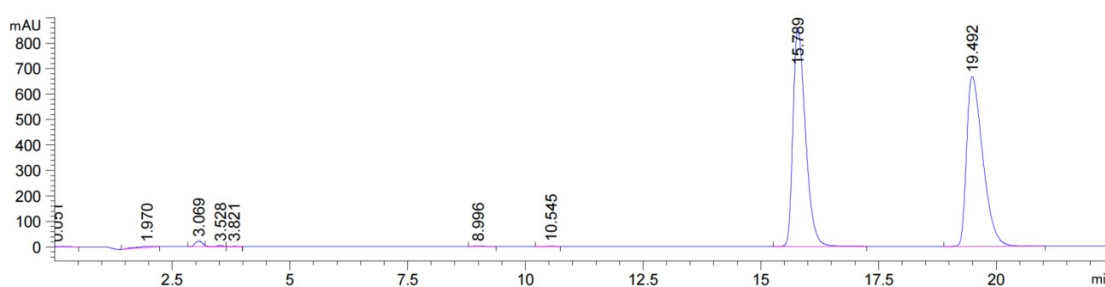

2

| No. | Ret. Time (min) | Area (mAU*min) | Height (mAU) | Area (%) |
|-----|-----------------|----------------|--------------|----------|
| 1   | 15.789          | 1.57640e4      | 856.89081    | 48.9195  |
| 2   | 19.492          | 1.59354e4      | 667.27185    | 49.4513  |

3 HPLC trace of **4a**, obtained with photoenzymatic reaction:

4 NCR:

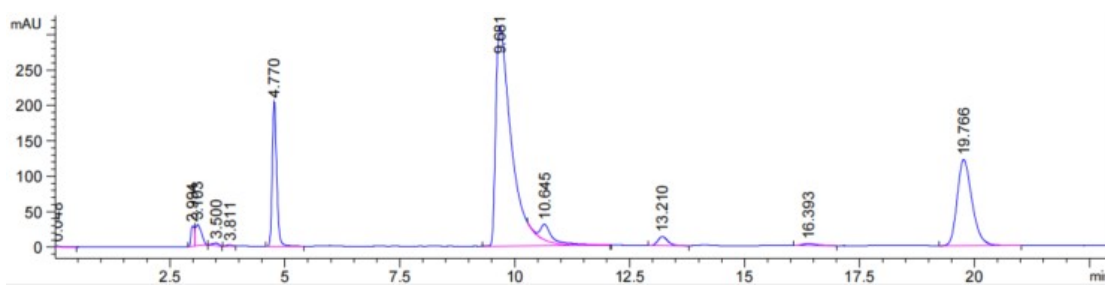

5

| No. | Ret. Time (min) | Area (mAU*min) | Height (mAU) | Area (%) |
|-----|-----------------|----------------|--------------|----------|
| 1   | 16.393          | 60.92949       | 2.90903      | 0.4762   |
| 2   | 19.766          | 2737.77466     | 121.53600    | 21.3963  |

6 GluER:

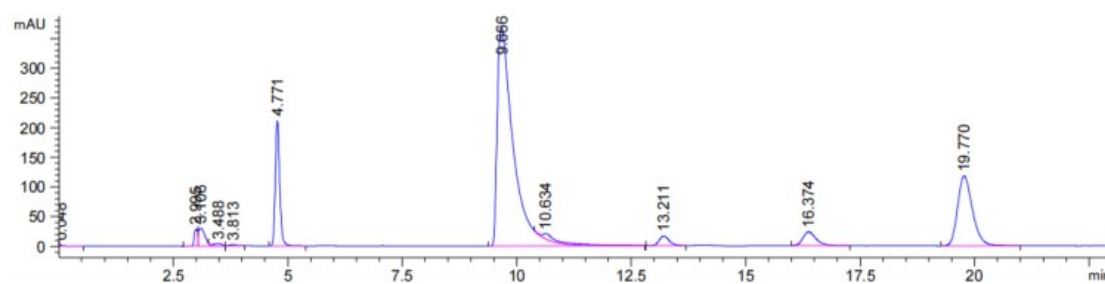

7

| No. | Ret. Time (min) | Area (mAU*min) | Height (mAU) | Area (%) |
|-----|-----------------|----------------|--------------|----------|
| 1   | 16.374          | 458.72461      | 23.09771     | 3.1309   |
| 2   | 19.770          | 2651.01074     | 117.57581    | 18.0937  |

8

9 HPLC trace of *rac-4b*:

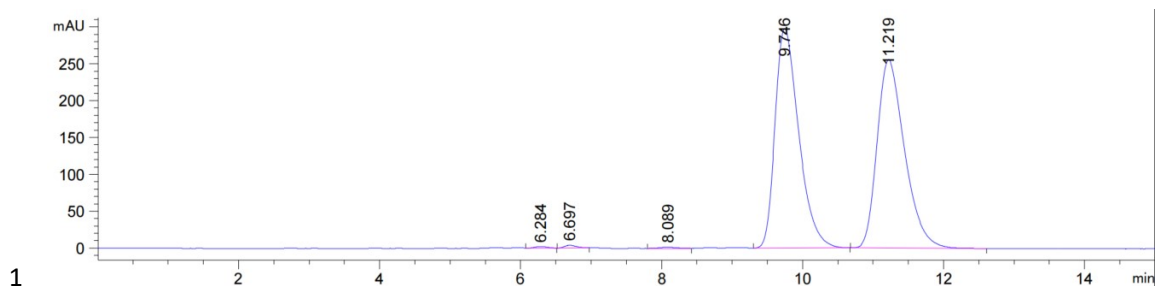

| No. | Ret. Time (min) | Area (mAU*min) | Height (mAU) | Area (%) |
|-----|-----------------|----------------|--------------|----------|
| 1   | 9.746           | 6941.44189     | 297.70920    | 48.3570  |
| 2   | 11.219          | 6930.19385     | 255.54117    | 48.2786  |

2 HPLC trace of **4b**, obtained with photoenzymatic reaction:

3 NCR:

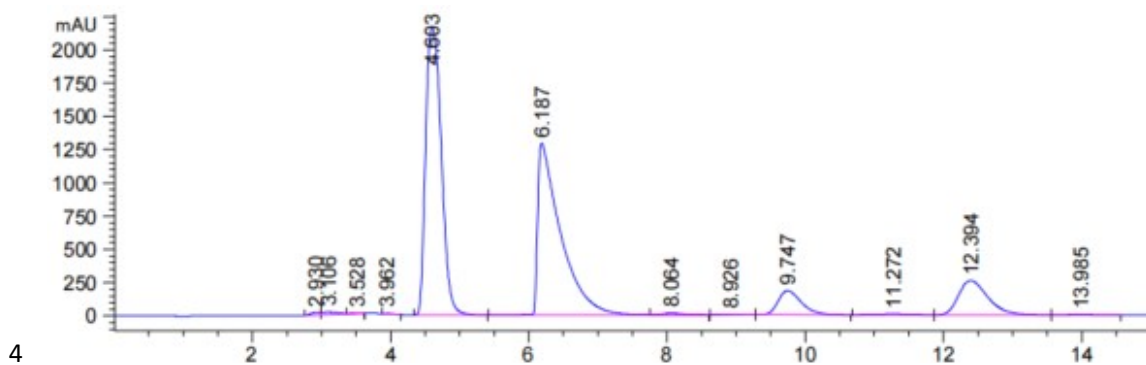

| No. | Ret. Time (min) | Area (mAU*min) | Height (mAU) | Area (%) |
|-----|-----------------|----------------|--------------|----------|
| 1   | 9.747           | 4226.45947     | 181.16693    | 5.3964   |
| 2   | 11.272          | 213.20457      | 6.82493      | 0.2722   |

5 GluER:

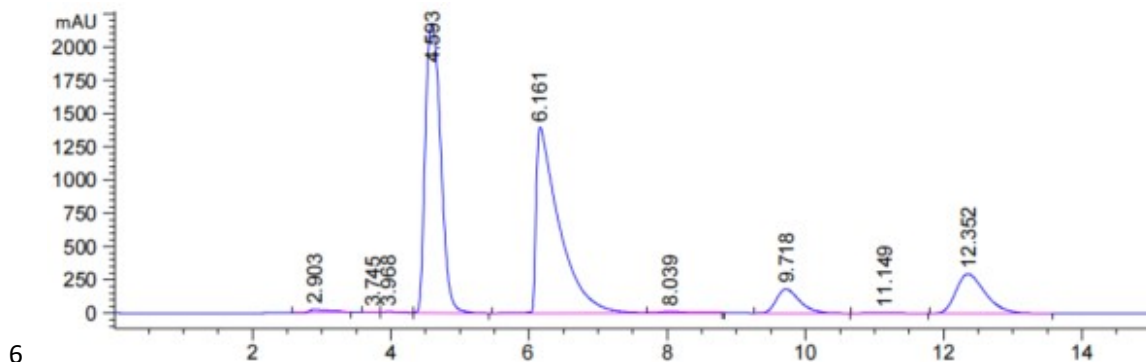

| No. | Ret. Time (min) | Area (mAU*min) | Height (mAU) | Area (%) |
|-----|-----------------|----------------|--------------|----------|
| 1   | 9.718           | 4232.58936     | 181.00433    | 5.2383   |
| 2   | 11.149          | 94.93866       | 2.47643      | 0.1175   |

7

1 HPLC trace of *rac-4c*:

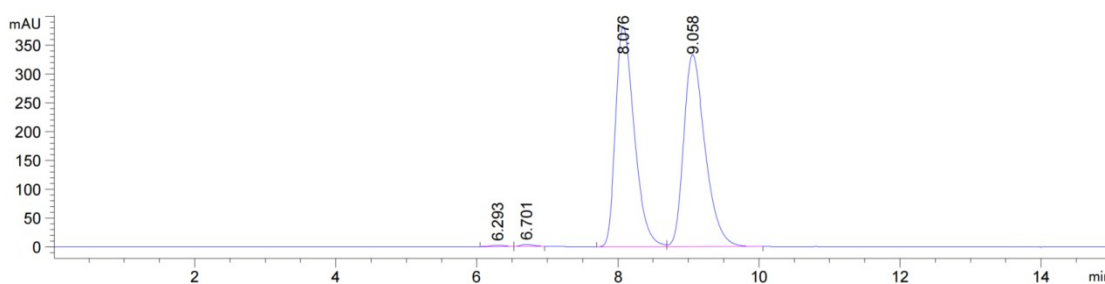

2

| No. | Ret. Time (min) | Area (mAU*min) | Height (mAU) | Area (%) |
|-----|-----------------|----------------|--------------|----------|
| 1   | 8.076           | 7030.05469     | 382.98389    | 48.3649  |
| 2   | 9.058           | 7052.33594     | 333.38864    | 48.5182  |

3 HPLC trace of **4c**, obtained with photoenzymatic reaction:

4 NCR:

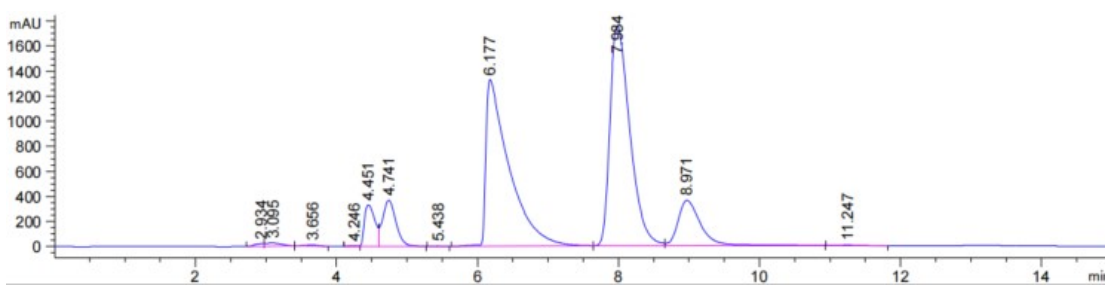

5

| No. | Ret. Time (min) | Area (mAU*min) | Height (mAU) | Area (%) |
|-----|-----------------|----------------|--------------|----------|
| 1   | 7.984           | 3.45265e4      | 1753.48865   | 42.0470  |
| 2   | 8.971           | 8148.20020     | 361.23303    | 9.9230   |

6 GluER:

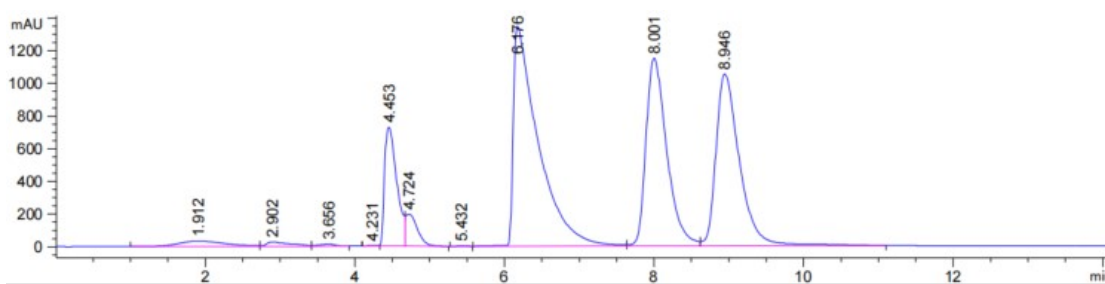

7

| No. | Ret. Time (min) | Area (mAU*min) | Height (mAU) | Area (%) |
|-----|-----------------|----------------|--------------|----------|
| 1   | 8.001           | 2.21883e4      | 1149.22314   | 24.9269  |
| 2   | 8.946           | 2.30237e4      | 1050.80701   | 25.8655  |

8

9 HPLC trace of *rac-4d*:



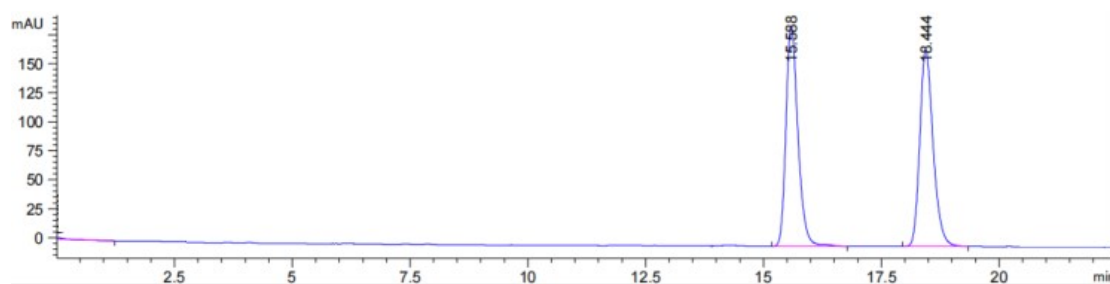

1

| No. | Ret. Time (min) | Area (mAU*min) | Height (mAU) | Area (%) |
|-----|-----------------|----------------|--------------|----------|
| 1   | 15.588          | 3363.63892     | 190.08977    | 50.2782  |
| 2   | 18.444          | 3326.41479     | 169.09909    | 49.7217  |

2 HPLC trace of **4d**, obtained with photoenzymatic reaction:

3 NCR:

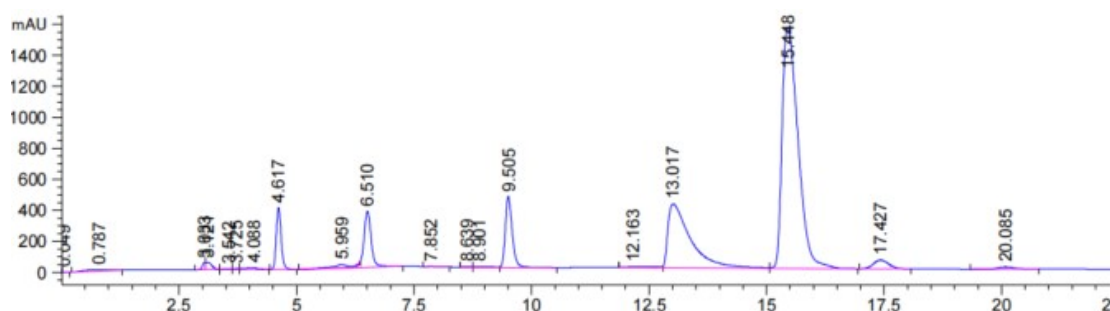

4

| No. | Ret. Time (min) | Area (mAU*min) | Height (mAU) | Area (%) |
|-----|-----------------|----------------|--------------|----------|
| 1   | 15.448          | 3.64929e4      | 1555.23462   | 55.7185  |

5 GluER:

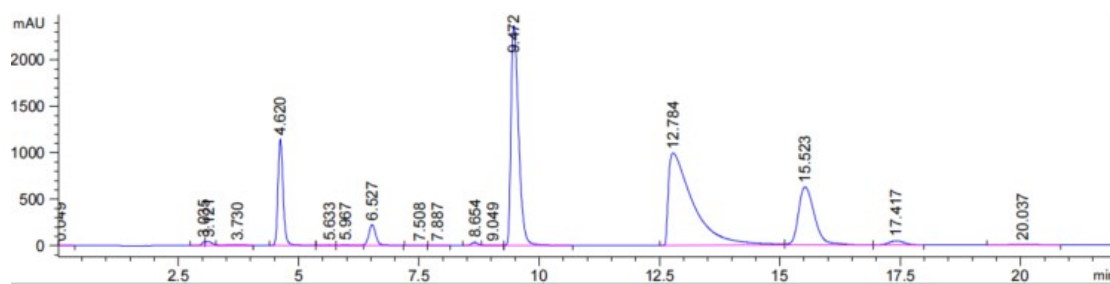

6

| No. | Ret. Time (min) | Area (mAU*min) | Height (mAU) | Area (%) |
|-----|-----------------|----------------|--------------|----------|
| 1   | 15.523          | 1.45240e4      | 626.25342    | 16.2623  |

7

8 HPLC trace of *rac-4e*:

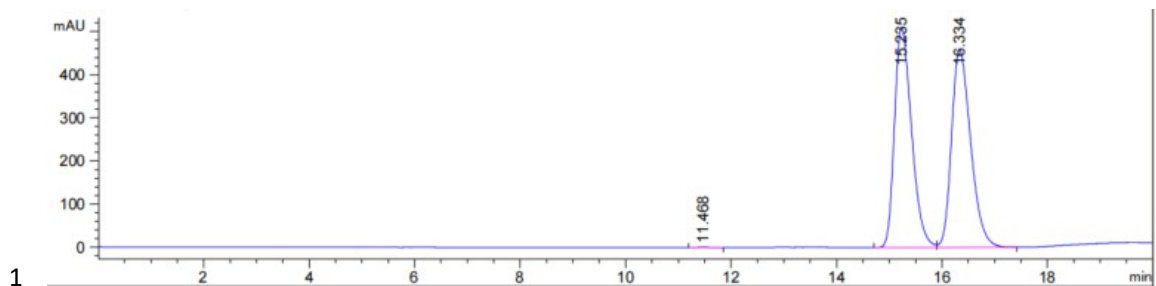

| No. | Ret. Time (min) | Area (mAU*min) | Height (mAU) | Area (%) |
|-----|-----------------|----------------|--------------|----------|
| 1   | 15.235          | 1.14580e4      | 508.50076    | 49.7050  |
| 2   | 16.334          | 1.15731e4      | 457.55530    | 50.2044  |

2 HPLC trace of 4e, obtained with photoenzymatic reaction:

3 NCR:

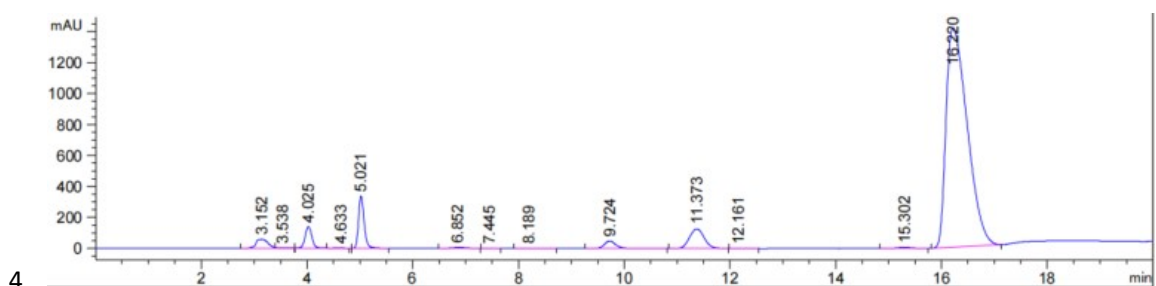

| No. | Ret. Time (min) | Area (mAU*min) | Height (mAU) | Area (%) |
|-----|-----------------|----------------|--------------|----------|
| 1   | 15.302          | 149.80655      | 7.56626      | 0.3135   |
| 2   | 16.220          | 3.93613e4      | 1416.40027   | 82.3595  |

5 GluER:

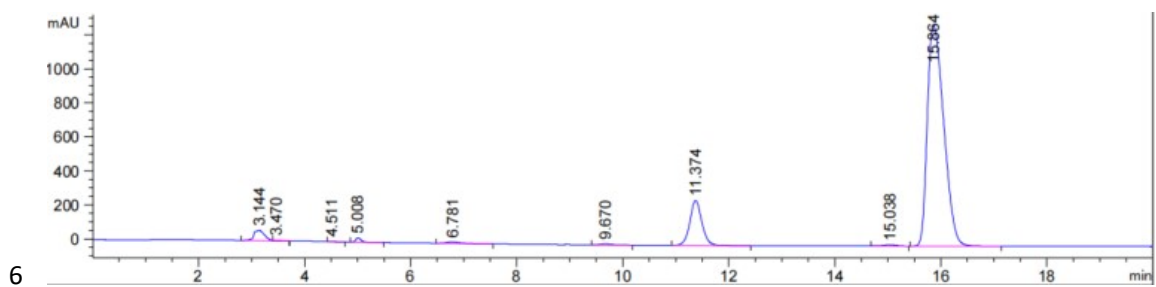

| No. | Ret. Time (min) | Area (mAU*min) | Height (mAU) | Area (%) |
|-----|-----------------|----------------|--------------|----------|
| 1   | 15.038          | 127.69012      | 7.63333      | 0.3811   |
| 2   | 15.864          | 2.78980e4      | 1297.89941   | 83.2548  |

7

8 HPLC trace of *rac*-4f:

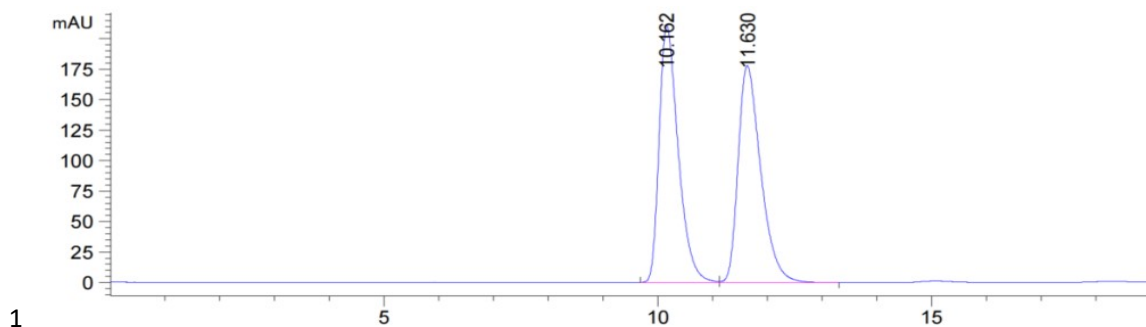

| No. | Ret. Time (min) | Area (mAU*min) | Height (mAU) | Area (%) |
|-----|-----------------|----------------|--------------|----------|
| 1   | 10.162          | 5102.08691     | 210.82014    | 49.8963  |
| 2   | 11.630          | 5123.28564     | 177.94373    | 50.1037  |

2 HPLC trace of **4f**, obtained with photoenzymatic reaction:

3 NCR:

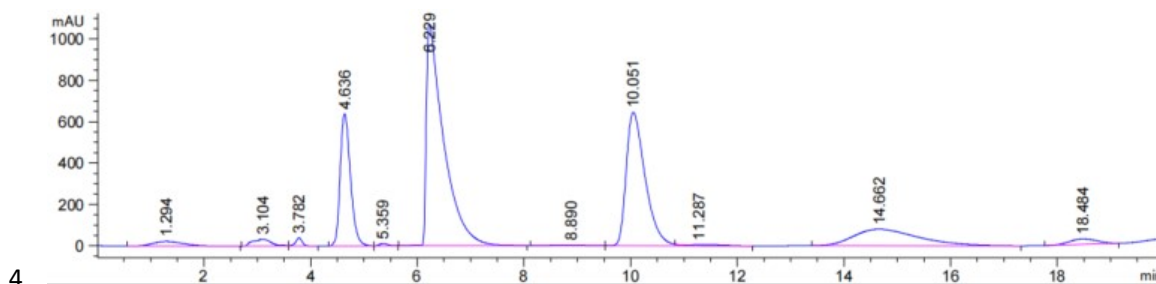

| No. | Ret. Time (min) | Area (mAU*min) | Height (mAU) | Area (%) |
|-----|-----------------|----------------|--------------|----------|
| 1   | 10.051          | 1.59094e4      | 646.27936    | 26.9675  |
| 2   | 11.287          | 263.17883      | 5.71406      | 0.4461   |

5 GluER:

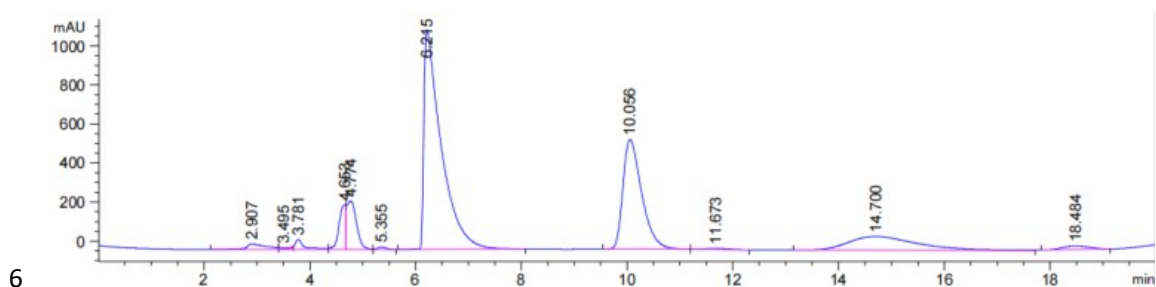

| No. | Ret. Time (min) | Area (mAU*min) | Height (mAU) | Area (%) |
|-----|-----------------|----------------|--------------|----------|
| 1   | 10.056          | 1.37798e4      | 561.82489    | 26.0119  |
| 2   | 11.673          | 158.51068      | 5.90323      | 0.2992   |

7

8 HPLC trace of *rac-4g*:

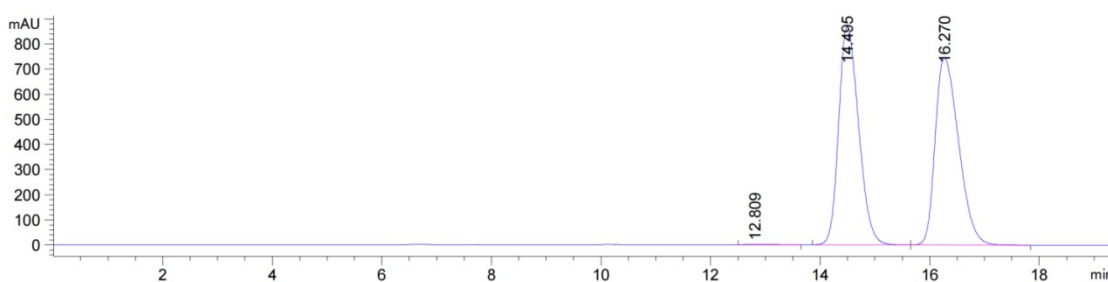

1

| No. | Ret. Time (min) | Area (mAU*min) | Height (mAU) | Area (%) |
|-----|-----------------|----------------|--------------|----------|
| 1   | 14.495          | 2.20161e4      | 869.40277    | 49.8851  |
| 2   | 16.270          | 2.21175e4      | 744.71246    | 50.1149  |

2 HPLC trace of **4g**, obtained with photoenzymatic reaction:

3 NCR:

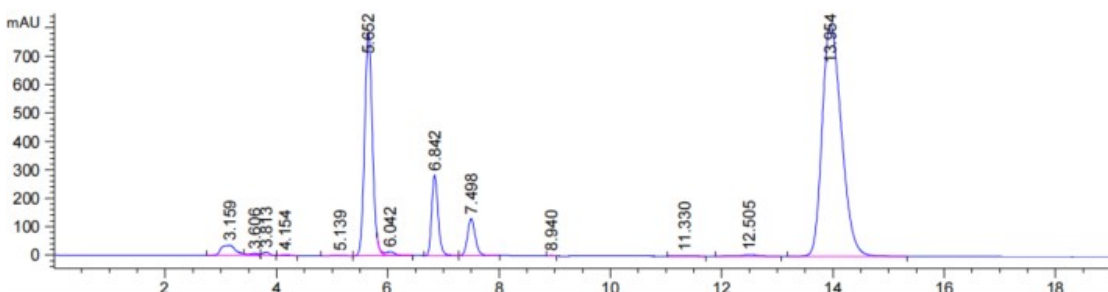

4

| No. | Ret. Time (min) | Area (mAU*min) | Height (mAU) | Area (%) |
|-----|-----------------|----------------|--------------|----------|
| 1   | 13.954          | 1.96055e4      | 815.05640    | 61.2883  |

5 GluER:

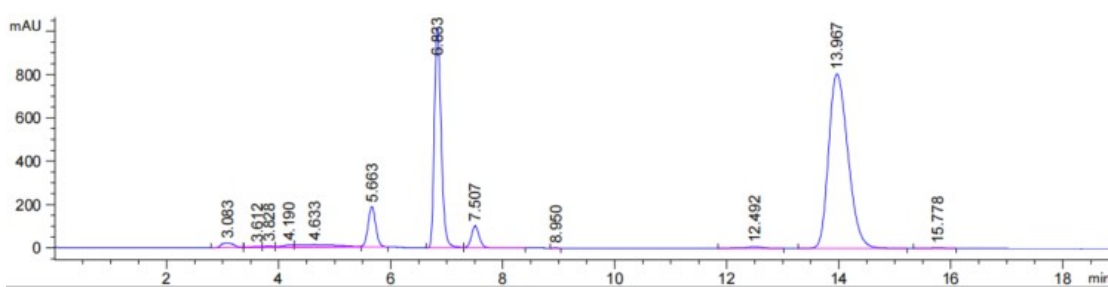

6

| No. | Ret. Time (min) | Area (mAU*min) | Height (mAU) | Area (%) |
|-----|-----------------|----------------|--------------|----------|
| 1   | 13.967          | 1.93042e4      | 804.71729    | 60.1333  |
| 2   | 15.778          | 29.56886       | 1.36888      | 0.0921   |

7

8 HPLC trace of *rac*-**4h**:

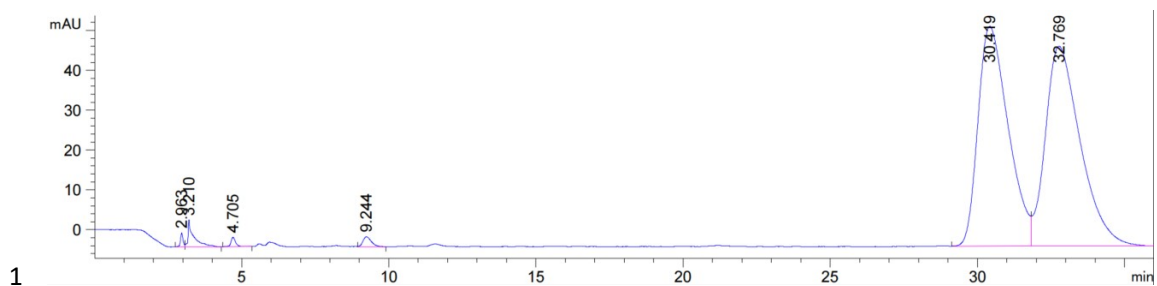

1

| No. | Ret. Time (min) | Area (mAU*min) | Height (mAU) | Area (%) |
|-----|-----------------|----------------|--------------|----------|
| 1   | 30.419          | 3929.84253     | 55.13811     | 47.5448  |
| 2   | 32.769          | 4145.77637     | 50.16341     | 50.1573  |

2 HPLC trace of **4h**, obtained with photoenzymatic reaction:

3 NCR:

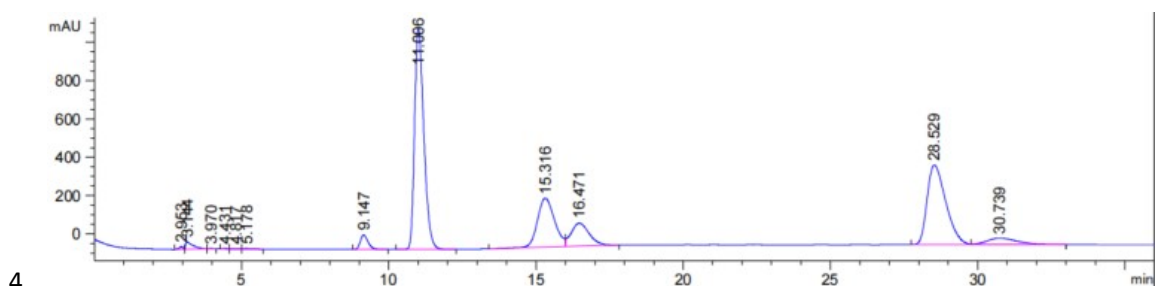

4

| No. | Ret. Time (min) | Area (mAU*min) | Height (mAU) | Area (%) |
|-----|-----------------|----------------|--------------|----------|
| 1   | 30.738          | 1490.11157     | 21.80930     | 4.3955   |

5 GluER:

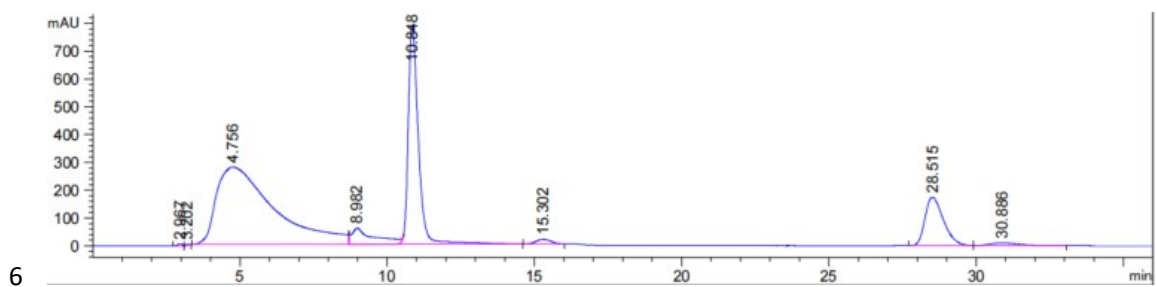

6

| No. | Ret. Time (min) | Area (mAU*min) | Height (mAU) | Area (%) |
|-----|-----------------|----------------|--------------|----------|
| 1   | 30.886          | 659.06970      | 9.77491      | 0.9556   |

7

8 HPLC trace of *rac-4i*:

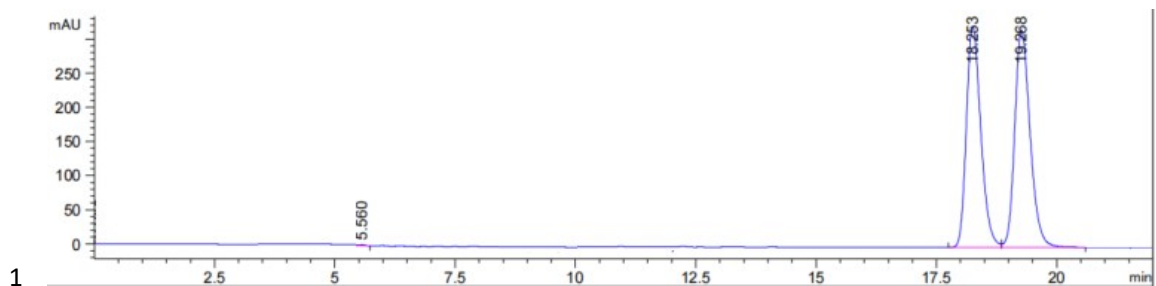

| No. | Ret. Time (min) | Area (mAU*min) | Height (mAU) | Area (%) |
|-----|-----------------|----------------|--------------|----------|
| 1   | 18.253          | 6719.63574     | 322.92419    | 48.7767  |
| 2   | 19.268          | 7039.95361     | 318.33133    | 51.1018  |

2 HPLC trace of **4i**, obtained with photoenzymatic reaction:

3 NCR:

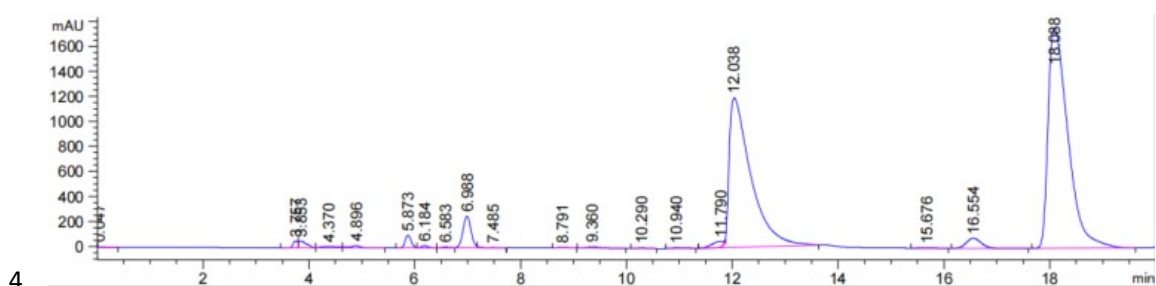

| No. | Ret. Time (min) | Area (mAU*min) | Height (mAU) | Area (%) |
|-----|-----------------|----------------|--------------|----------|
| 1   | 18.088          | 4.61496e4      | 1764.75989   | 52.3042  |

5 GluER:

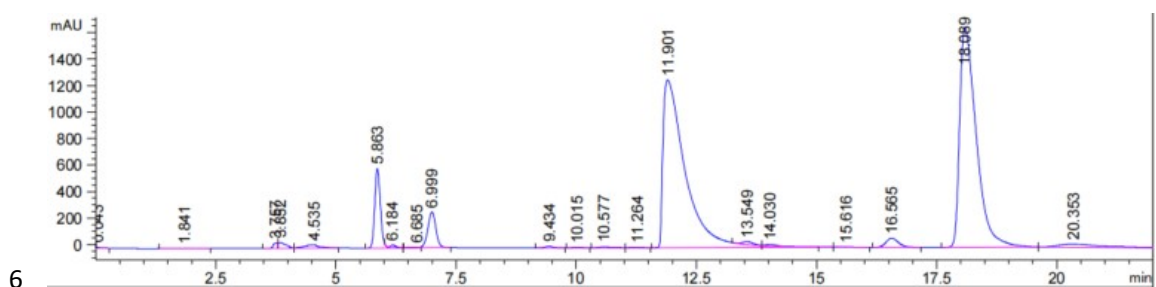

| No. | Ret. Time (min) | Area (mAU*min) | Height (mAU) | Area (%) |
|-----|-----------------|----------------|--------------|----------|
| 1   | 18.089          | 3.98015e4      | 1655.46509   | 42.3998  |

7

8 HPLC trace of *rac-4j*:

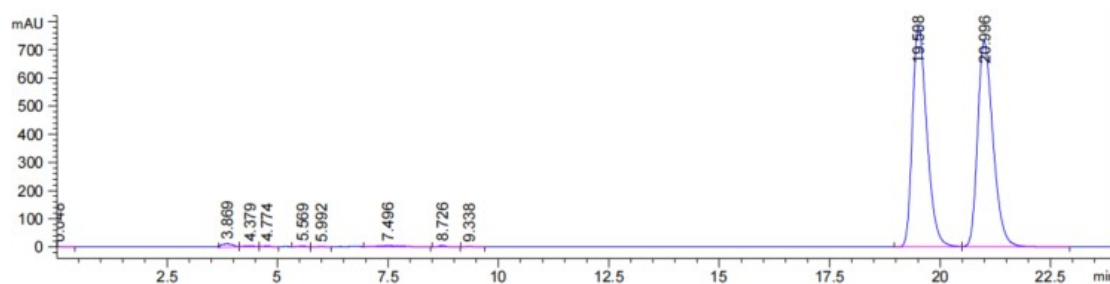

1

| No. | Ret. Time (min) | Area (mAU*min) | Height (mAU) | Area (%) |
|-----|-----------------|----------------|--------------|----------|
| 1   | 19.508          | 1.77560e4      | 782.56616    | 49.0597  |
| 2   | 20.996          | 1.78110e4      | 730.10089    | 49.2117  |

2 HPLC trace of **4j**, obtained with photoenzymatic reaction:

3 NCR:

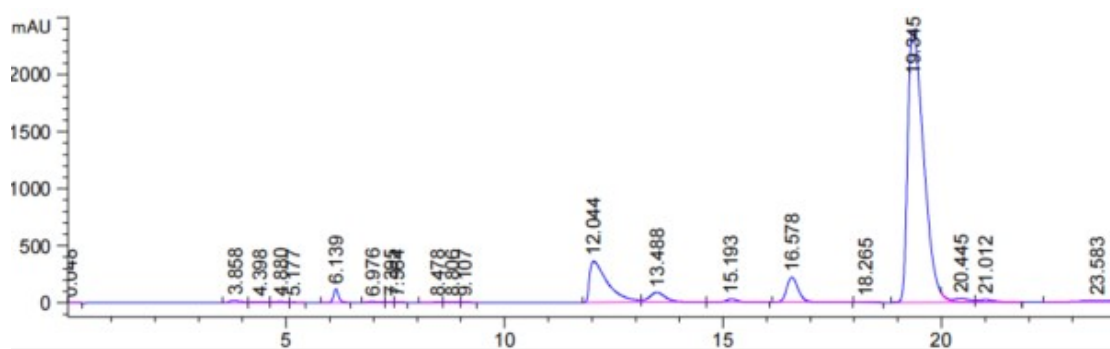

4

| No. | Ret. Time (min) | Area (mAU*min) | Height (mAU) | Area (%) |
|-----|-----------------|----------------|--------------|----------|
| 1   | 19.345          | 6.08409e4      | 2388.93457   | 72.2577  |
| 2   | 21.012          | 554.55219      | 21.46774     | 0.6586   |

5 GluER:

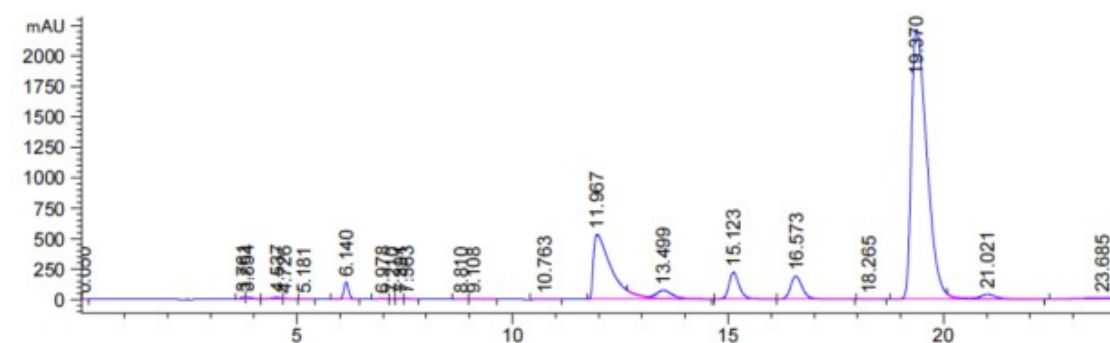

6

| No. | Ret. Time (min) | Area (mAU*min) | Height (mAU) | Area (%) |
|-----|-----------------|----------------|--------------|----------|
| 1   | 19.370          | 5.53249e4      | 2213.53857   | 64.6561  |
| 2   | 21.021          | 1190.23193     | 38.06504     | 1.3910   |

7

1 HPLC trace of *rac-4k*:

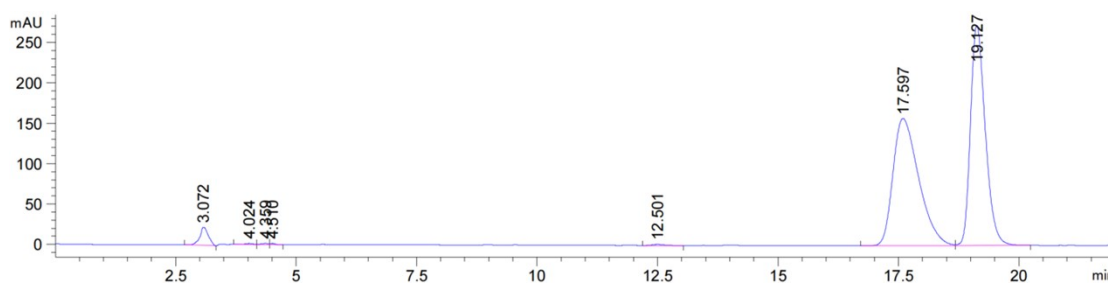

2

| No. | Ret. Time (min) | Area (mAU*min) | Height (mAU) | Area (%) |
|-----|-----------------|----------------|--------------|----------|
| 1   | 17.597          | 5850.75342     | 157.60025    | 48.6189  |
| 2   | 19.127          | 5837.43506     | 272.56689    | 48.5082  |

3 HPLC trace of **4k**, obtained with photoenzymatic reaction:

4 NCR:

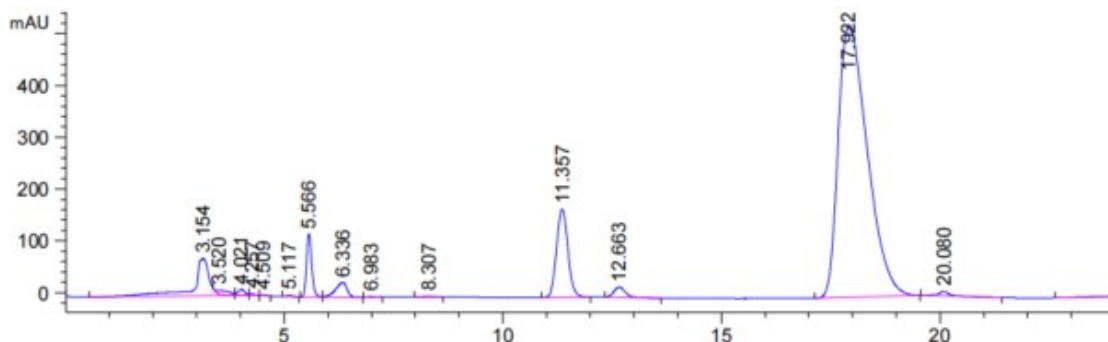

5

| No. | Ret. Time (min) | Area (mAU*min) | Height (mAU) | Area (%) |
|-----|-----------------|----------------|--------------|----------|
| 1   | 17.922          | 2.42161e4      | 525.24359    | 66.4198  |
| 2   | 20.080          | 163.54437      | 8.74254      | 0.4486   |

6 GluER:

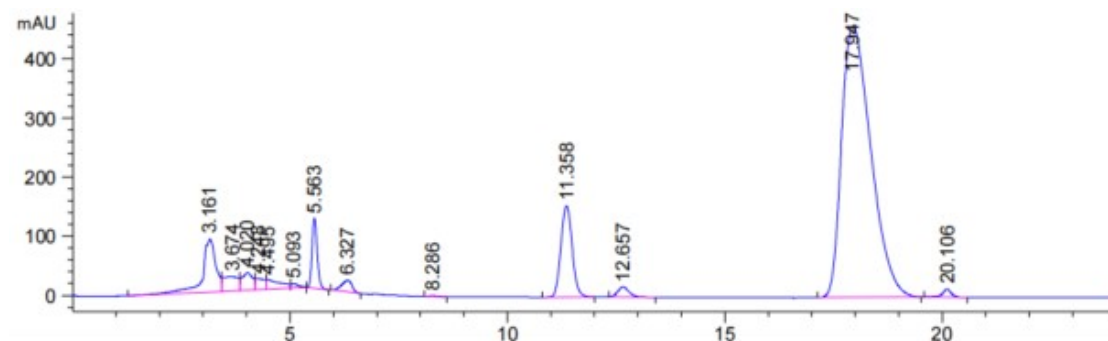

7

| No. | Ret. Time (min) | Area (mAU*min) | Height (mAU) | Area (%) |
|-----|-----------------|----------------|--------------|----------|
| 1   | 17.947          | 2.14341e4      | 458.18457    | 63.4352  |



|   |        |           |          |        |
|---|--------|-----------|----------|--------|
| 2 | 20.106 | 198.81239 | 13.95777 | 0.5884 |
|---|--------|-----------|----------|--------|

1

2 HPLC trace of *rac-4I*:

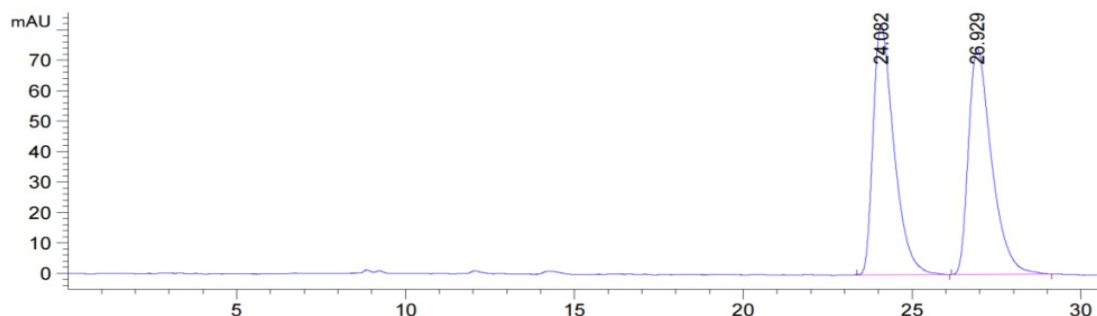

3

| No. | Ret. Time (min) | Area (mAU*min) | Height (mAU) | Area (%) |
|-----|-----------------|----------------|--------------|----------|
| 1   | 24.082          | 3532.67236     | 82.18550     | 49.9976  |
| 2   | 26.929          | 3533.01367     | 74.33914     | 50.0024  |

4 HPLC trace of **4I**, obtained with photoenzymatic reaction:

5 NCR:

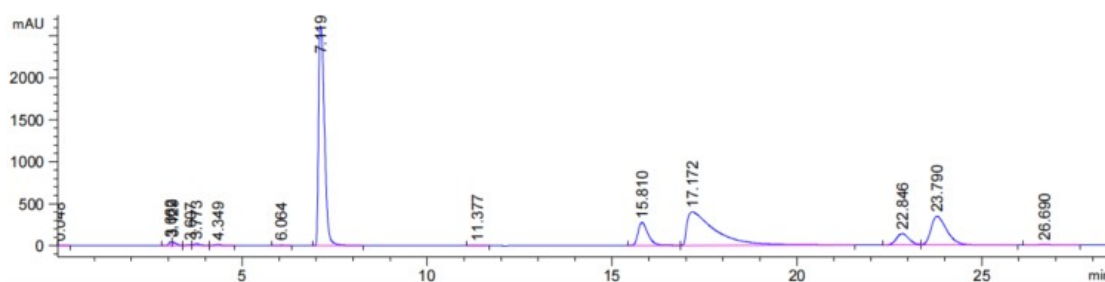

6

| No. | Ret. Time (min) | Area (mAU*min) | Height (mAU) | Area (%) |
|-----|-----------------|----------------|--------------|----------|
| 1   | 23.790          | 1.01904e4      | 342.11456    | 14.4829  |
| 2   | 26.690          | 172.28575      | 5.85135      | 0.2449   |

7 GluER:

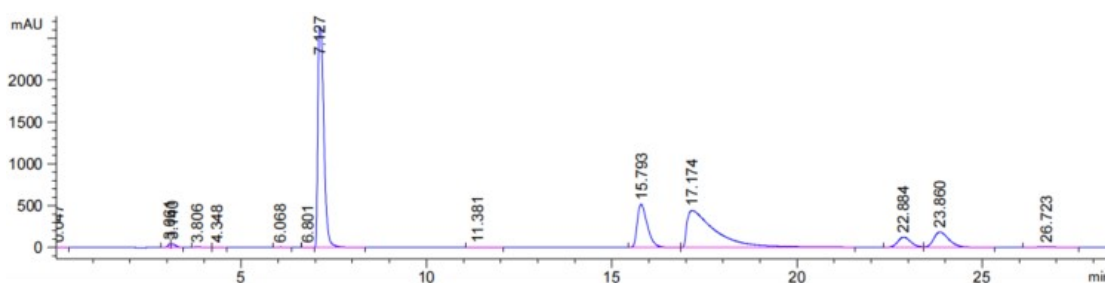

8

| No. | Ret. Time (min) | Area (mAU*min) | Height (mAU) | Area (%) |
|-----|-----------------|----------------|--------------|----------|
| 1   | 23.860          | 5201.79688     | 182.08836    | 7.1928   |

|   |        |           |         |        |
|---|--------|-----------|---------|--------|
| 2 | 26.723 | 243.14815 | 8.13967 | 0.3362 |
|---|--------|-----------|---------|--------|

1

2 HPLC trace of *rac-4m*:

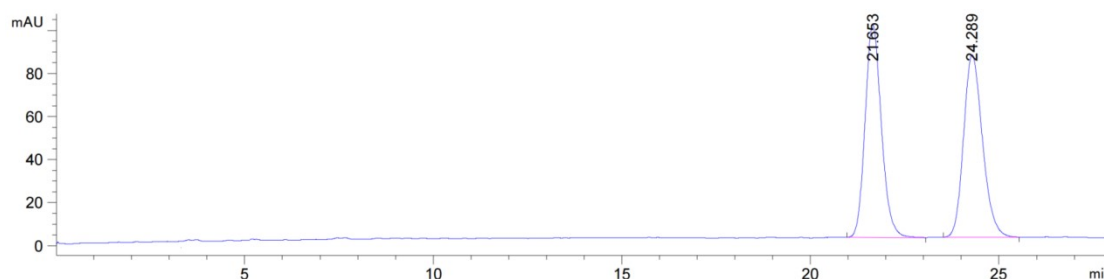

3

| No. | Ret. Time (min) | Area (mAU*min) | Height (mAU) | Area (%) |
|-----|-----------------|----------------|--------------|----------|
| 1   | 21.653          | 2966.98560     | 98.84965     | 50.0583  |
| 2   | 24.289          | 2960.07520     | 84.74799     | 49.9417  |

4 HPLC trace of **4m**, obtained with photoenzymatic reaction:

5 NCR:

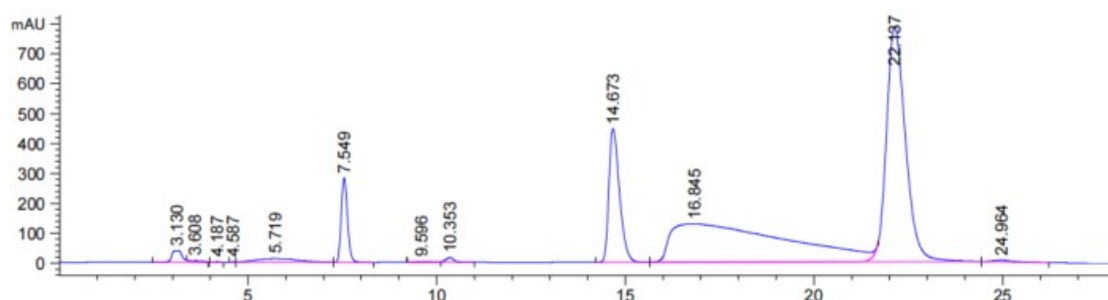

6

| No. | Ret. Time (min) | Area (mAU*min) | Height (mAU) | Area (%) |
|-----|-----------------|----------------|--------------|----------|
| 1   | 22.137          | 2.77590e4      | 786.59204    | 39.9104  |
| 2   | 24.964          | 214.83688      | 5.87770      | 0.3089   |

7 GluER:

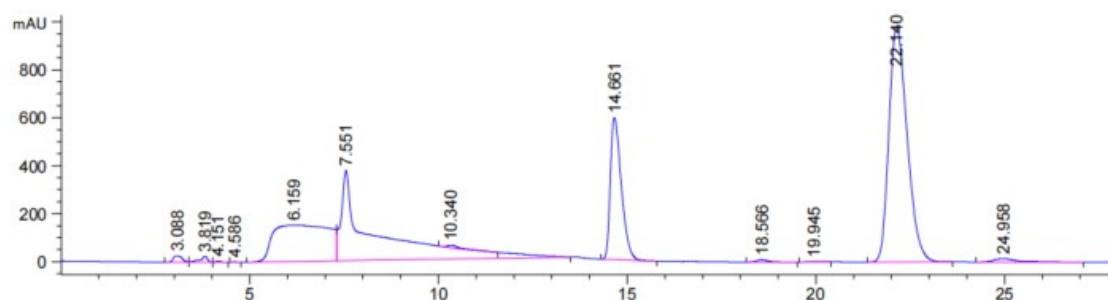

8

| No. | Ret. Time (min) | Area (mAU*min) | Height (mAU) | Area (%) |
|-----|-----------------|----------------|--------------|----------|
| 1   | 22.140          | 3.28805e4      | 982.14142    | 37.1066  |

|   |        |           |          |        |
|---|--------|-----------|----------|--------|
| 2 | 24.958 | 698.80994 | 14.92718 | 0.7886 |
|---|--------|-----------|----------|--------|

1

2 HPLC trace of *rac-4n*:

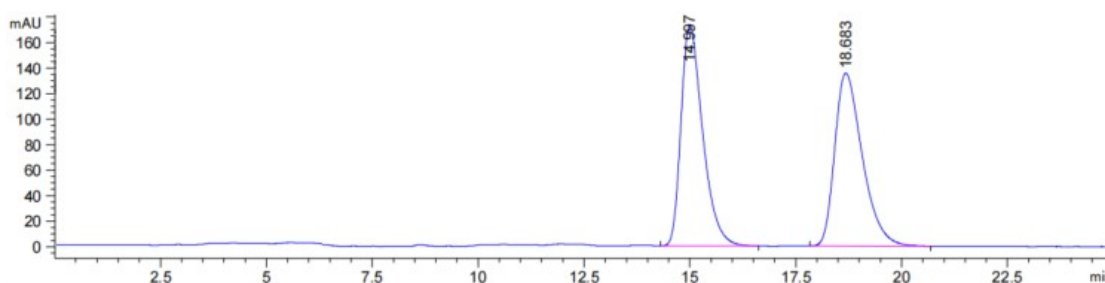

3

| No. | Ret. Time (min) | Area (mAU*min) | Height (mAU) | Area (%) |
|-----|-----------------|----------------|--------------|----------|
| 1   | 14.997          | 6142.64307     | 172.56667    | 49.9962  |
| 2   | 18.683          | 6143.57764     | 135.55336    | 50.0038  |

4 HPLC trace of **4n**, obtained with photoenzymatic reaction:

5 NCR:

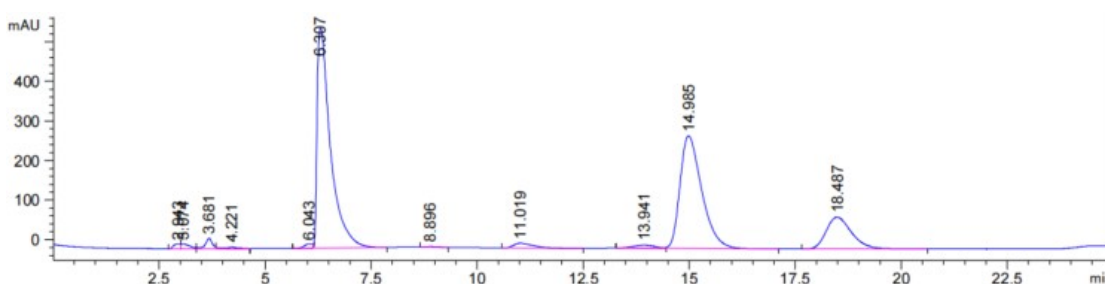

6

| No. | Ret. Time (min) | Area (mAU*min) | Height (mAU) | Area (%) |
|-----|-----------------|----------------|--------------|----------|
| 1   | 14.985          | 1.01677e4      | 284.84781    | 37.3009  |
| 2   | 18.487          | 3386.05225     | 80.53845     | 12.4219  |

7 GluER:

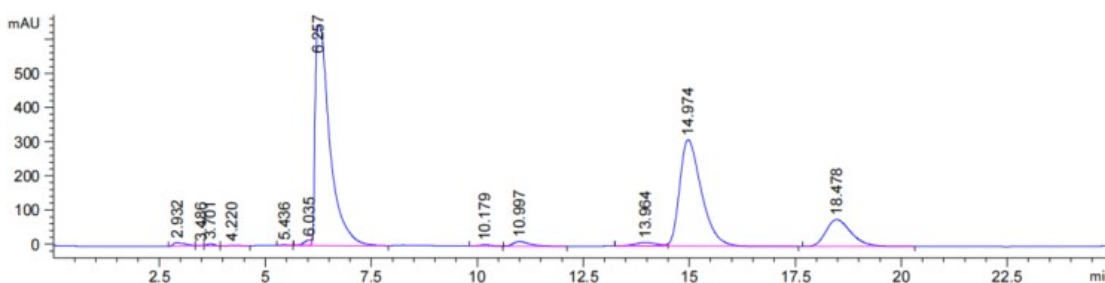

8

| No. | Ret. Time (min) | Area (mAU*min) | Height (mAU) | Area (%) |
|-----|-----------------|----------------|--------------|----------|
| 1   | 14.974          | 1.11670e4      | 311.94879    | 35.7363  |
| 2   | 18.478          | 3293.35913     | 78.98102     | 10.5393  |

1

2 HPLC trace of *rac-4o*:

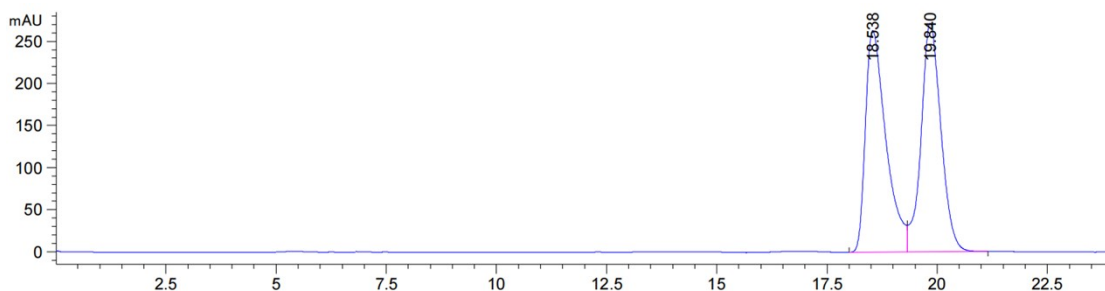

3

| No. | Ret. Time (min) | Area (mAU*min) | Height (mAU) | Area (%) |
|-----|-----------------|----------------|--------------|----------|
| 1   | 18.538          | 8539.57422     | 263.33539    | 50.0419  |
| 2   | 19.840          | 8525.28809     | 271.54053    | 49.9581  |

4 HPLC trace of **4o**, obtained with photoenzymatic reaction:

5 NCR:

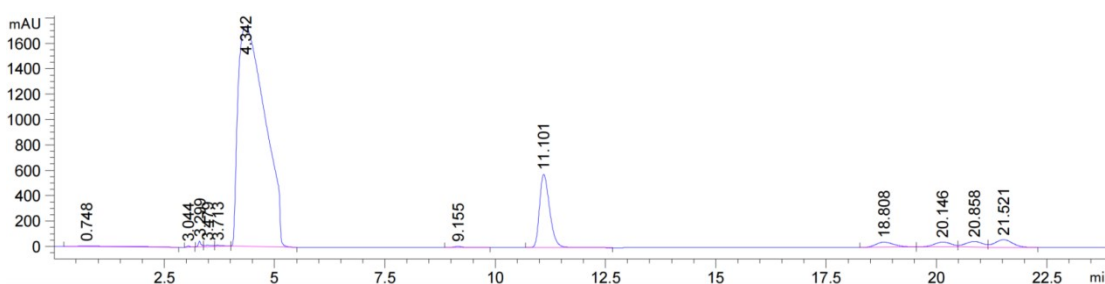

6

| No. | Ret. Time (min) | Area (mAU*min) | Height (mAU) | Area (%) |
|-----|-----------------|----------------|--------------|----------|
| 1   | 18.808          | 1192.88708     | 41.04874     | 1.3431   |
| 2   | 20.146          | 1103.00354     | 39.96597     | 1.2419   |

7 GluER:

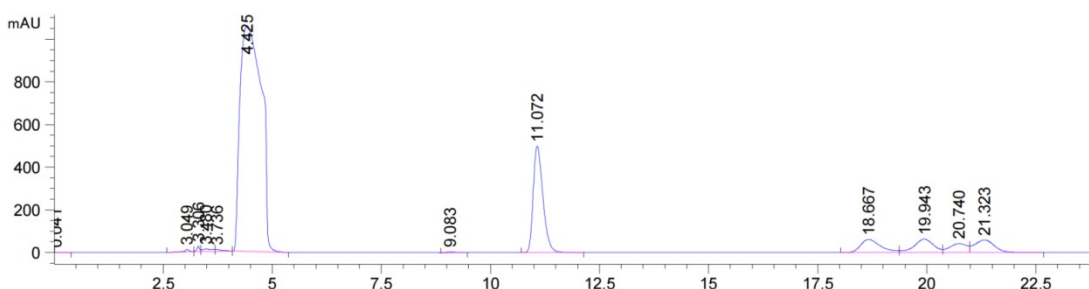

8

| No. | Ret. Time (min) | Area (mAU*min) | Height (mAU) | Area (%) |
|-----|-----------------|----------------|--------------|----------|
| 1   | 18.667          | 1957.34180     | 61.58783     | 3.8366   |
| 2   | 19.943          | 1925.85596     | 62.73369     | 3.7748   |

9

1 **5 <sup>1</sup>H NMR and <sup>13</sup>C NMR**

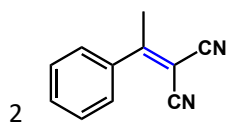

3 **2-(1-phenylethylidene)malononitrile (3a)**

4 <sup>1</sup>H NMR (400 MHz, CDCl<sub>3</sub>) δ 7.56 – 7.24 (m, 5H), 2.62 (s, 3H); <sup>13</sup>C NMR (100 MHz,  
5 CDCl<sub>3</sub>) δ 175.59, 135.85, 132.32, 129.13, 127.36, 112.82, 112.75, 84.66, 24.33, 24.32;  
6 light yellow solid

7

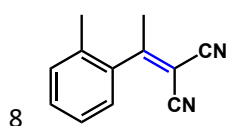

9 **2-(1-(o-tolyl)ethylidene)malononitrile (3b)**

10 <sup>1</sup>H NMR (400 MHz, CDCl<sub>3</sub>) δ 7.37 – 7.24 (m, 3H), 7.07 (d, *J* = 8.0 Hz, 1H), 2.53 (s,  
11 3H), 2.29 (s, 3H); <sup>13</sup>C NMR (100 MHz, CDCl<sub>3</sub>) δ 179.06, 136.59, 133.62, 131.22,  
12 130.43, 126.46, 125.99, 111.90, 111.75, 88.27, 25.36, 19.26; white solid

13

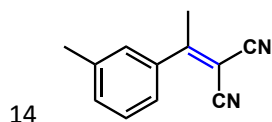

15 **2-(1-(m-tolyl)ethylidene)malononitrile (3c)**

16 <sup>1</sup>H NMR (400 MHz, CDCl<sub>3</sub>) δ 7.41 – 7.33 (m, 4H), 2.62 (s, 3H), 2.42 (s, 3H); <sup>13</sup>C  
17 NMR (100 MHz, CDCl<sub>3</sub>) δ 175.71, 139.06, 135.93, 133.02, 128.99, 127.77, 124.46,  
18 112.82, 112.78, 84.47, 24.28, 21.35; white solid

19

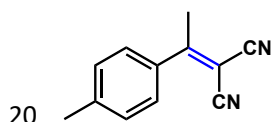

21 **2-(1-(p-tolyl)ethylidene)malononitrile (3d)**

22 <sup>1</sup>H NMR (400 MHz, CDCl<sub>3</sub>) δ 7.48 (d, *J* = 8.0 Hz, 2H), 7.30 (d, *J* = 8.0 Hz, 2H), 2.62  
23 (s, 3H), 2.42 (s, 3H); <sup>13</sup>C NMR (100 MHz, CDCl<sub>3</sub>) δ 175.21, 143.36, 133.02, 129.77,  
24 127.49, 113.13, 112.99, 83.62, 24.07, 21.56; white solid

25

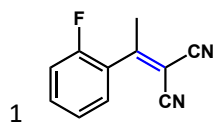

2 **2-(1-(2-fluorophenyl)ethylidene)malononitrile (3e)**

3 <sup>1</sup>H NMR (400 MHz, CDCl<sub>3</sub>) δ 7.56 – 7.50 (m, 1H), 7.38 (td, *J* = 8.0, 4.0 Hz, 1H),  
 4 7.30 (dd, *J* = 8.0, 4.0 Hz, 1H), 7.25-7.20 (m, 1H), 2.63 (s, 3H); <sup>13</sup>C NMR (100 MHz,  
 5 CDCl<sub>3</sub>) δ 171.81, 171.80, 159.74, 157.23, 133.64, 133.55, 128.81, 124.87, 124.84,  
 6 124.29, 124.15, 117.00, 116.79, 111.87, 111.82, 88.52, 88.35, 24.34, 24.31; light  
 7 yellow solid

8

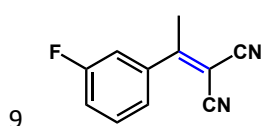

10 **2-(1-(3-fluorophenyl)ethylidene)malononitrile (3f)**

11 <sup>1</sup>H NMR (400 MHz, CDCl<sub>3</sub>) δ 7.53 – 7.47 (m, 1H), 7.36 – 7.34 (m, 1H), 7.28 – 7.21  
 12 (m, 2H), 2.63 (s, 3H); <sup>13</sup>C NMR (100 MHz, CDCl<sub>3</sub>) δ 173.70, 163.81, 161.32, 137.72,  
 13 137.64, 131.07, 130.99, 123.15, 123.12, 119.25, 119.04, 114.59, 114.36, 112.27,  
 14 85.88, 24.29; light brown oily liquid

15

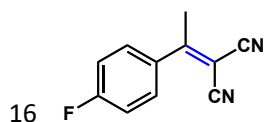

17 **2-(1-(4-fluorophenyl)ethylidene)malononitrile (3g)**

18 <sup>1</sup>H NMR (400 MHz, CDCl<sub>3</sub>) δ 7.62 – 7.57 (m, 2H), 7.24 – 7.18 (m, 2H), 2.64 (s, 3H);  
 19 <sup>13</sup>C NMR (100 MHz, CDCl<sub>3</sub>) δ 173.91, 166.11, 163.57, 131.86, 131.83, 129.95,  
 20 129.86, 116.62, 116.40, 112.75, 112.59, 84.70, 84.69, 29.69, 24.28; light yellow solid

21

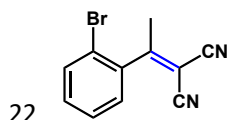

23 **2-(1-(2-bromophenyl)ethylidene)malononitrile (3h)**

24 <sup>1</sup>H NMR (400 MHz, CDCl<sub>3</sub>) δ 7.67 (d, *J* = 8.0 Hz, 1H), 7.44 (t, *J* = 16.0 Hz, 1H), 7.34  
 25 (t, *J* = 16.0 Hz, 1H), 7.18 (d, *J* = 8.0 Hz, 1H), 2.58 (s, 3H); <sup>13</sup>C NMR (100 MHz,  
 26 CDCl<sub>3</sub>) δ 176.98, 137.71, 133.69, 131.82, 128.15, 127.77, 119.31, 111.52, 111.25,

1 89.65, 24.80; yellow oily liquid

2

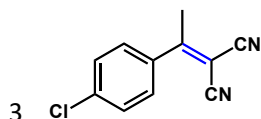

4 **2-(1-(4-chlorophenyl)ethylidene)malononitrile (3i)**

5  $^1\text{H NMR}$  (400 MHz,  $\text{CDCl}_3$ )  $\delta$  7.52 – 7.47 (m, 4H), 2.62 (s, 3H);  $^{13}\text{C NMR}$  (100 MHz,

6  $\text{CDCl}_3$ )  $\delta$  173.83, 138.69, 134.13, 129.50, 128.76, 112.56, 112.45, 85.16, 29.68, 24.16;

7 yellow solid

8

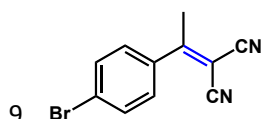

10 **2-(1-(4-bromophenyl)ethylidene)malononitrile (3j)**

11  $^1\text{H NMR}$  (400 MHz,  $\text{CDCl}_3$ )  $\delta$  7.66 – 7.63 (m, 2H), 7.45 – 7.40 (m, 2H), 2.61 (s, 3H);

12  $^{13}\text{C NMR}$  (100 MHz,  $\text{CDCl}_3$ )  $\delta$  173.97, 134.60, 132.47, 128.86, 127.10, 112.56,

13 112.46, 85.16, 24.13; white yellow

14

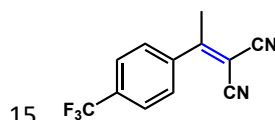

16 **2-(1-(4-(trifluoromethyl)phenyl)ethylidene)malononitrile (3k)**

17  $^1\text{H NMR}$  (400 MHz,  $\text{CDCl}_3$ )  $\delta$  7.79 (d, 2H), 7.65 (d, 2H), 2.67 (s, 3H);  $^{13}\text{C NMR}$  (100

18 MHz,  $\text{CDCl}_3$ )  $\delta$  173.84, 139.18, 127.72, 126.30, 126.26, 126.22, 126.19, 112.07,

19 112.02, 109.99, 86.72, 24.41; light brown oily liquid

20

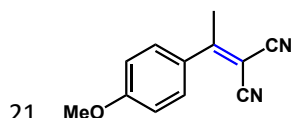

22 **2-(1-(4-methoxyphenyl)ethylidene)malononitrile (3l)**

23  $^1\text{H NMR}$  (400 MHz,  $\text{CDCl}_3$ )  $\delta$  7.62 (dt,  $J = 12.0, 4.0$  Hz, 2H), 6.99 (dt,  $J = 8.0, 4.0$  Hz,

24 2H), 3.88 (s, 3H), 2.62 (s, 3H);  $^{13}\text{C NMR}$  (100 MHz,  $\text{CDCl}_3$ )  $\delta$  173.93, 163.08,

25 129.79, 127.88, 114.45, 113.62, 113.35, 81.96, 55.58, 23.80; light yellow solid

26

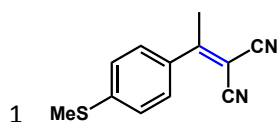

2 **2-(1-(4-(methylthio)phenyl)ethylidene)malononitrile (3m)**

3  $^1\text{H}$  NMR (400 MHz,  $\text{CDCl}_3$ )  $\delta$  7.53 (d,  $J = 8.0$  Hz, 2H), 7.30 (d,  $J = 8.0$  Hz, 2H), 2.62  
4 (s, 3H), 2.53 (s, 3H);  $^{13}\text{C}$  NMR (100 MHz,  $\text{CDCl}_3$ )  $\delta$  174.02, 145.83, 131.50, 127.94,  
5 125.40, 113.27, 113.09, 83.05, 29.70, 23.83, 14.73; bright yellow solid

6

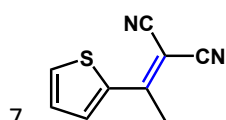

8 **2-(1-(thiophen-2-yl)ethylidene)malononitrile (3n)**

9  $^1\text{H}$  NMR (400 MHz,  $\text{CDCl}_3$ )  $\delta$  8.06 (d,  $J = 4.0$  Hz, 1H), 7.79 (d,  $J = 4.0$  Hz, 1H), 7.25  
10 (d,  $J = 4.0$  Hz, 1H), 2.71 (s, 3H);  $^{13}\text{C}$  NMR (100 MHz,  $\text{CDCl}_3$ )  $\delta$  162.54, 138.27,  
11 134.35, 133.54, 129.15, 114.00, 113.51, 78.80, 23.63; light yellow solid

12

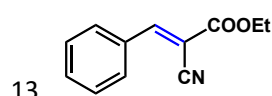

14 **ethyl (E)-2-cyano-3-phenylacrylate (3o)**

15  $^1\text{H}$  NMR (400 MHz,  $\text{CDCl}_3$ )  $\delta$  8.25 (s, 1H), 7.99 (d,  $J = 8.0$  Hz, 2H), 7.58 – 7.49 (m,  
16 3H), 4.39 (q,  $J = 8.0$  Hz, 2H), 1.40 (t,  $J = 8.0$  Hz, 3H);  $^{13}\text{C}$  NMR (100 MHz,  $\text{CDCl}_3$ )  $\delta$   
17 162.45, 154.99, 133.26, 131.47, 131.03, 129.25, 115.44, 103.05, 62.71, 14.14; white  
18 solid

19

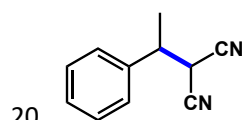

21 **2-(1-phenylethyl)malononitrile (4a)**

22  $^1\text{H}$  NMR (400 MHz,  $\text{CDCl}_3$ )  $\delta$  7.41 – 7.31 (m, 5H), 3.84 (d,  $J = 4.0$  Hz, 1H), 3.47 –  
23 3.41 (m, 1H), 1.64 (d,  $J = 4.0$  Hz, 3H);  $^{13}\text{C}$  NMR (100 MHz,  $\text{CDCl}_3$ )  $\delta$  138.14, 129.23,  
24 128.83, 127.20, 111.94, 111.65, 41.16, 31.19, 17.74; ESI calculated for  
25  $[\text{C}_{11}\text{H}_{10}\text{N}_2+\text{H}]$  171.0917. Found 171.0916; light yellow liquid

26



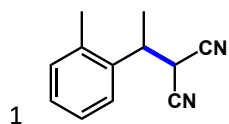

2 **2-(1-(o-tolyl)ethyl)malononitrile (4b)**

3  $^1\text{H}$  NMR (400 MHz,  $\text{CDCl}_3$ )  $\delta$  7.33 – 7.26 (m, 2H), 7.25 – 7.21 (m, 2H), 3.81 (d,  $J =$   
 4 8.0, 1H), 3.79 – 3.72 (m, 1H), 2.40 (s, 3H), 1.62 (d,  $J = 8.0$  Hz, 3H);  $^{13}\text{C}$  NMR (100  
 5 MHz,  $\text{CDCl}_3$ )  $\delta$  136.69, 135.57, 131.24, 128.41, 127.05, 125.34, 112.16, 111.74,  
 6 36.34, 29.99, 19.48, 18.04; ESI calculated for  $[\text{C}_{12}\text{H}_{12}\text{N}_2+\text{H}]$  185.1073. Found  
 7 185.1088; light yellow liquid

8

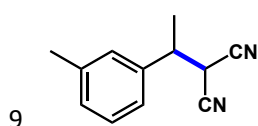

10 **2-(1-(m-tolyl)ethyl)malononitrile (4c)**

11  $^1\text{H}$  NMR (400 MHz,  $\text{CDCl}_3$ )  $\delta$  7.31 – 7.27 (m, 1H), 7.17 (d,  $J = 8.0$  Hz, 1H), 7.12 –  
 12 7.11 (m, 2H), 3.84 (d,  $J = 4.0$ , 1H), 3.44 – 3.38 (m, 1H), 2.37 (s, 3H), 1.64 (d,  $J = 4.0$   
 13 Hz, 3H);  $^{13}\text{C}$  NMR (100 MHz,  $\text{CDCl}_3$ )  $\delta$  139.01, 138.18, 129.56, 129.10, 127.86,  
 14 124.16, 112.02, 111.70, 41.17, 31.19, 21.44, 17.80; ESI calculated for  $[\text{C}_{12}\text{H}_{12}\text{N}_2+\text{H}]$   
 15 185.1073. Found 185.1088; light yellow liquid

16

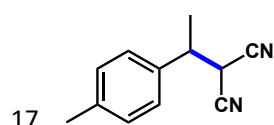

18 **2-(1-(p-tolyl)ethyl)malononitrile (4d)**

19  $^1\text{H}$  NMR (400 MHz,  $\text{CDCl}_3$ )  $\delta$  7.21 (s, 4H), 3.82 (d,  $J = 8.0$  Hz, 1H), 3.46 – 3.39 (m,  
 20 1H), 2.36 (s, 3H), 1.63 (d,  $J = 8.0$  Hz, 3H);  $^{13}\text{C}$  NMR (100 MHz,  $\text{CDCl}_3$ )  $\delta$  138.70,  
 21 135.17, 129.87, 127.05, 112.01, 111.73, 40.89, 31.32, 21.09, 17.81; ESI calculated for  
 22  $[\text{C}_{12}\text{H}_{12}\text{N}_2+\text{H}]$  185.1073. Found 185.1088; white solid

23

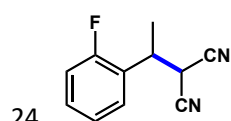

25 **2-(1-(2-fluorophenyl)ethyl)malononitrile (4e)**

26  $^1\text{H}$  NMR (400 MHz,  $\text{CDCl}_3$ )  $\delta$  7.41 – 7.34 (m, 2H), 7.22 (t,  $J = 8.0$  Hz, 1H), 7.15 –

1 7.10 (m, 1H), 4.04 (d,  $J = 8.0$ , 1H), 3.84 – 3.77 (m, 1H), 1.68 (d,  $J = 4.0$  Hz, 3H);  $^{13}\text{C}$   
2 NMR (100 MHz,  $\text{CDCl}_3$ )  $\delta$  161.60, 159.15, 130.58, 130.49, 128.34, 125.06, 116.14,  
3 115.92, 111.90, 111.34, 34.86, 34.84, 29.44, 29.41, 16.42, 16.41; ESI calculated for  
4  $[\text{C}_{11}\text{H}_{10}\text{FN}_2+\text{H}]$  189.0823. Found 189.0814; light yellow liquid

5

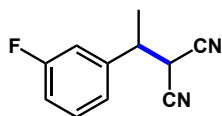

6

7 **2-(1-(3-fluorophenyl)ethyl)malononitrile (4f)**

8  $^1\text{H}$  NMR (400 MHz,  $\text{CDCl}_3$ )  $\delta$  7.39 (td,  $J = 16.0, 8.0$  Hz, 1H), 7.15 – 7.03 (m, 3H),  
9 3.86 (d,  $J = 4.0$  Hz, 1H), 3.49 – 3.42 (m, 1H), 1.65 (d,  $J = 8.0$  Hz, 3H);  $^{13}\text{C}$  NMR (100  
10 MHz,  $\text{CDCl}_3$ )  $\delta$  164.23, 161.76, 140.45, 140.45, 130.96, 130.87, 123.04, 123.01,  
11 116.05, 115.84, 114.47, 114.25, 111.61, 111.35, 40.83, 30.98, 17.74; ESI calculated  
12 for  $[\text{C}_{11}\text{H}_{10}\text{FN}_2+\text{H}]$  189.0823. Found 189.0814; light yellow liquid

13

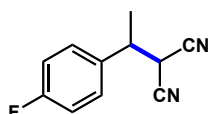

14

15 **2-(1-(4-fluorophenyl)ethyl)malononitrile (4g)**

16  $^1\text{H}$  NMR (400 MHz,  $\text{CDCl}_3$ )  $\delta$  7.35 – 7.30 (m, 2H), 7.14 – 7.08 (m, 2H), 3.84 (d,  $J =$   
17 8.0 Hz, 1H), 3.50 – 3.43 (m, 1H), 1.64 (d,  $J = 8.0$  Hz, 3H);  $^{13}\text{C}$  NMR (100 MHz,  
18  $\text{CDCl}_3$ )  $\delta$  164.01, 161.54, 133.83, 129.09, 129.00, 116.35, 116.13, 111.74, 111.55,  
19 40.47, 31.31, 17.90; ESI calculated for  $[\text{C}_{11}\text{H}_{10}\text{FN}_2+\text{H}]$  189.0823. Found 189.0814;  
20 yellow liquid

21

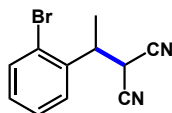

22

23 **2-(1-(2-bromophenyl)ethyl)malononitrile (4h)**

24  $^1\text{H}$  NMR (400 MHz,  $\text{CDCl}_3$ )  $\delta$  7.63 (d,  $J = 8.0$  Hz, 1H), 7.46 – 7.39 (m, 2H), 7.26 –  
25 7.22 (m, 1H), 4.13 (d,  $J = 4.0$  Hz, 1H), 4.03 – 3.96 (m, 1H), 1.70 (d,  $J = 8.0$  Hz, 3H);  
26  $^{13}\text{C}$  NMR (100 MHz,  $\text{CDCl}_3$ )  $\delta$  136.79, 133.54, 130.31, 128.43, 128.12, 124.40,  
27 112.01, 110.90, 39.51, 29.21, 15.92; ESI calculated for  $[\text{C}_{11}\text{H}_9\text{BrN}_2+\text{H}]$  249.0022.

1 Found 249.0480; light yellow liquid

2

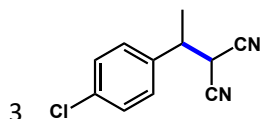

4 **2-(1-(4-chlorophenyl)ethyl)malononitrile (4i)**

5  $^1\text{H NMR}$  (400 MHz,  $\text{CDCl}_3$ )  $\delta$  7.41 – 7.38 (m, 2H), 7.30 – 7.26 (m, 2H), 7.83 (d,  $J =$

6 8.0 Hz, 1H), 3.48 – 3.41 (m, 1H), 1.64 (d,  $J = 8.0$  Hz, 3H);  $^{13}\text{C NMR}$  (100 MHz,

7  $\text{CDCl}_3$ )  $\delta$  136.49, 134.88, 129.46, 128.64, 111.61, 111.42, 40.61, 31.08, 17.77; ESI

8 calculated for  $[\text{C}_{11}\text{H}_9\text{ClN}_2+\text{H}]$  205.0527. Found 205.0561; light yellow liquid

9

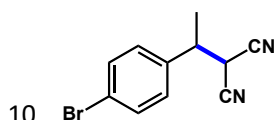

11 **2-(1-(4-bromophenyl)ethyl)malononitrile (4j)**

12  $^1\text{H NMR}$  (400 MHz,  $\text{CDCl}_3$ )  $\delta$  7.55 (d,  $J = 8.0$  Hz, 2H), 7.22 (m,  $J = 8.0$  Hz, 2H), 3.83

13 (d,  $J = 8.0$  Hz, 1H), 3.47 – 3.40 (m, 1H), 1.63 (d,  $J = 8.0$  Hz, 3H);  $^{13}\text{C NMR}$  (100

14 MHz,  $\text{CDCl}_3$ )  $\delta$  137.00, 132.42, 128.94, 123.00, 111.59, 111.40, 40.68, 30.99, 17.71;

15 ESI calculated for  $[\text{C}_{11}\text{H}_9\text{BrN}_2+\text{H}]$  249.0022. Found 249.0480; light brown liquid

16

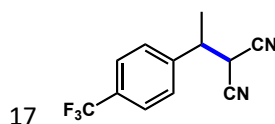

18 **2-(1-(4-(trifluoromethyl)phenyl)ethyl)malononitrile (4k)**

19  $^1\text{H NMR}$  (400 MHz,  $\text{CDCl}_3$ )  $\delta$  7.69 (d,  $J = 8.0$  Hz, 2H), 7.49 (d,  $J = 8.0$  Hz, 2H), 3.80

20 (d,  $J = 8.0$  Hz, 1H), 3.57 – 3.51 (m, 1H), 1.68 (d,  $J = 8.0$  Hz, 3H);  $^{13}\text{C NMR}$  (100

21 MHz,  $\text{CDCl}_3$ )  $\delta$  141.87, 133.34, 131.02, 127.85, 126.33, 126.29, 126.25, 126.21,

22 125.05, 122.35, 111.47, 111.29, 40.88, 40.86, 30.87, 30.86, 17.72; ESI calculated for

23  $[\text{C}_{12}\text{H}_9\text{F}_3\text{N}_2+\text{H}]$  239.0791. Found 239.0784; light yellow liquid

24

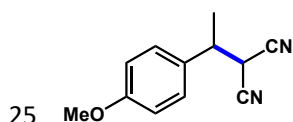

26 **2-(1-(4-methoxyphenyl)ethyl)malononitrile (4l)**

1  $^1\text{H}$  NMR (400 MHz,  $\text{CDCl}_3$ )  $\delta$  7.26 (d,  $J = 12.0$  Hz, 2H), 6.92 (m,  $J = 8.0$  Hz, 2H),  
2 3.81 (s, 3H), 3.45 – 3.38 (m, 1H), 1.62 (d,  $J = 8.0$  Hz, 3H);  $^{13}\text{C}$  NMR (100 MHz,  
3  $\text{CDCl}_3$ )  $\delta$  159.81, 130.10, 128.38, 114.52, 112.04, 111.81, 55.31, 40.53, 31.47, 17.87;  
4 ESI calculated for  $[\text{C}_{12}\text{H}_{12}\text{N}_2\text{O}+\text{H}]$  201.1022. Found 201.1008; light yellow liquid

5

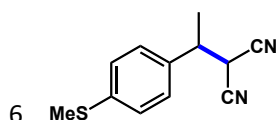

7 **2-(1-(4-(methylthio)phenyl)ethyl)malononitrile (4m)**

8  $^1\text{H}$  NMR (400 MHz,  $\text{CDCl}_3$ )  $\delta$  7.28-7.23 (m, 4H), 3.84 (d,  $J = 4.0$  Hz, 1H), 3.46 –  
9 3.39 (m, 1H), 1.63 (d,  $J = 4.0$  Hz, 3H);  $^{13}\text{C}$  NMR (100 MHz,  $\text{CDCl}_3$ )  $\delta$  139.64, 134.55,  
10 127.69, 126.74, 111.91, 111.69, 40.71, 31.23, 17.73, 15.46; ESI calculated for  
11  $[\text{C}_{12}\text{H}_{12}\text{N}_2\text{S}+\text{H}]$  217.0794. Found 217.0776; light yellow liquid

12

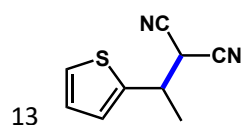

14 **2-(1-(thiophen-2-yl)ethyl)malononitrile (4n)**

15  $^1\text{H}$  NMR (400 MHz,  $\text{CDCl}_3$ )  $\delta$  7.32 (d,  $J = 4.0$  Hz, 1H), 7.12 (d,  $J = 4.0$  Hz, 1H), 7.03  
16 (t,  $J = 4.0$  Hz, 1H), 3.93 (d,  $J = 4.0$  Hz, 1H), 3.81 – 3.75 (m, 1H), 1.72 (d,  $J = 8.0$  Hz,  
17 3H);  $^{13}\text{C}$  NMR (100 MHz,  $\text{CDCl}_3$ )  $\delta$  140.80, 127.40, 126.20, 125.62, 111.65, 111.35,  
18 36.95, 32.01, 19.07; ESI calculated for  $[\text{C}_9\text{H}_8\text{N}_2\text{S}+\text{H}]$  177.0481. Found 177.0498;  
19 light yellow liquid

20

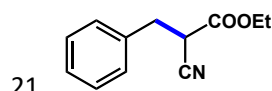

22 **ethyl 2-cyano-3-phenylpropanoate (4o)**

23  $^1\text{H}$  NMR (400 MHz,  $\text{CDCl}_3$ )  $\delta$  7.37 – 7.27 (m, 5H), 4.24 (q,  $J = 8.0$  Hz, 2H), 3.72 (dd,  
24  $J = 8.0, 4.0$  Hz, 1H), 3.31 – 3.17 (m, 2H), 1.27 (t,  $J = 8.0$  Hz, 3H).  $^{13}\text{C}$  NMR (100  
25 MHz,  $\text{CDCl}_3$ )  $\delta$  165.52, 135.25, 129.02, 128.87, 127.79, 116.16, 62.96, 39.70, 35.75,  
26 13.94; ESI calculated for  $[\text{C}_{12}\text{H}_{13}\text{NO}_2+\text{H}]$  204.1019. Found 249.1036; light yellow  
27 liquid

1 **2-(1-phenylethylidene)malononitrile (3a)**

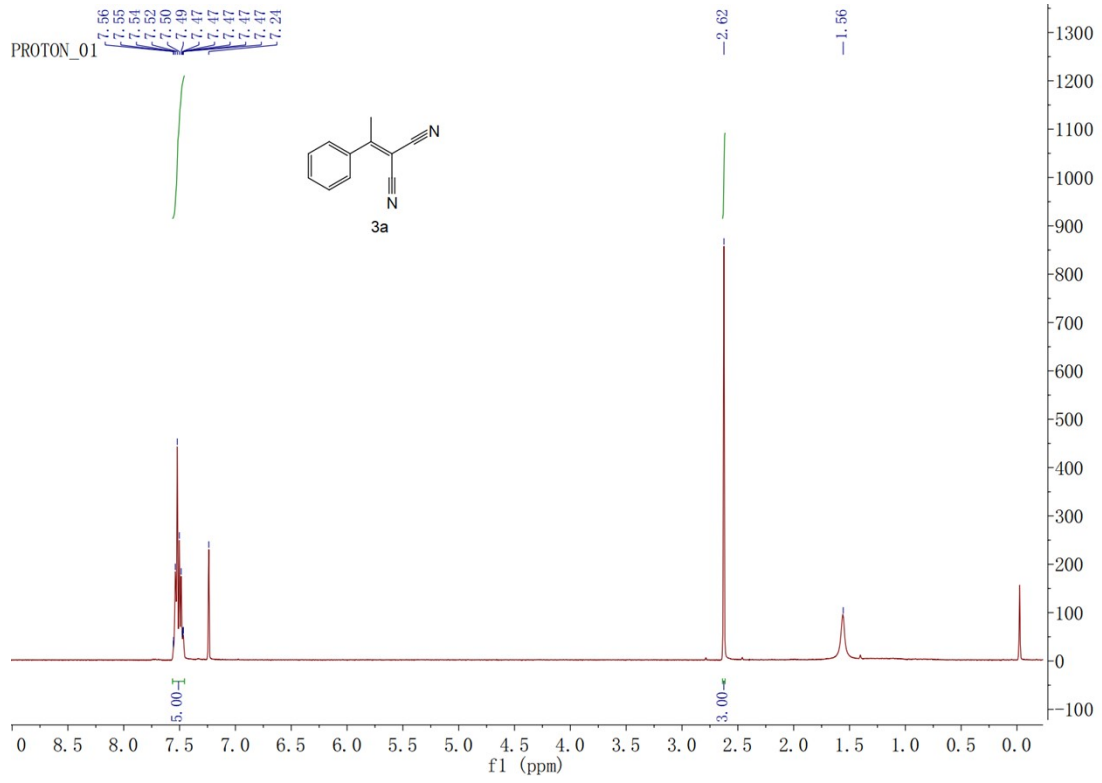

2

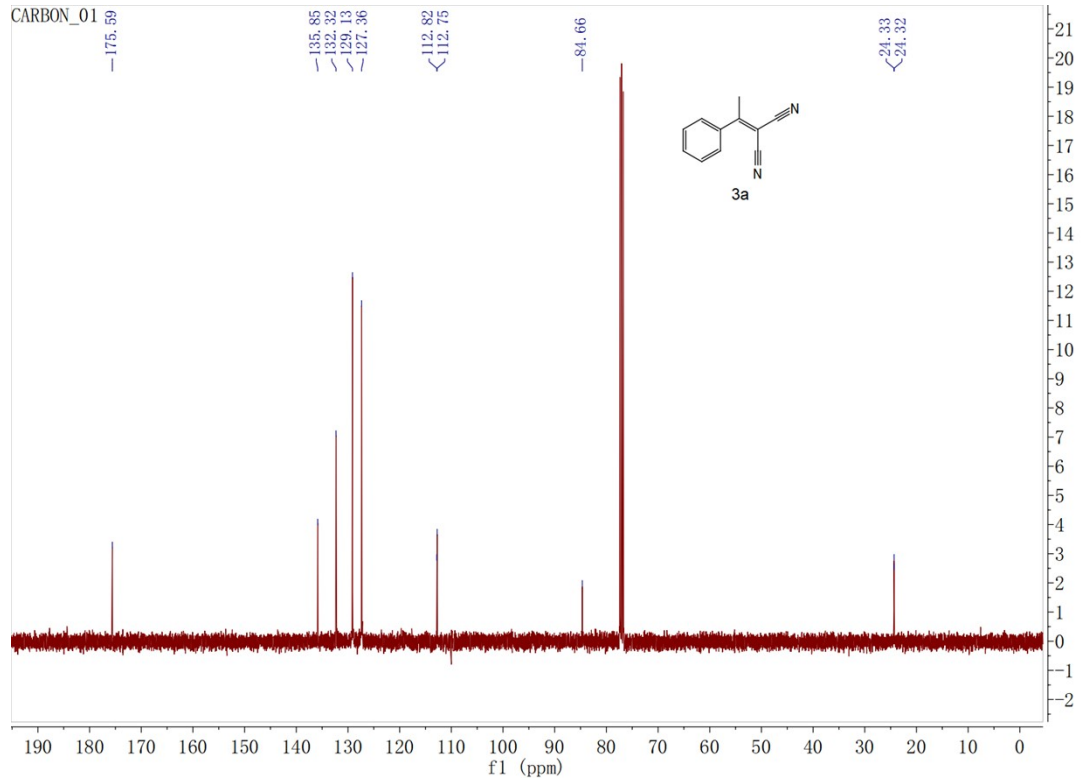

3

4

1 **2-(1-(o-tolyl)ethylidene)malononitrile (3b)**

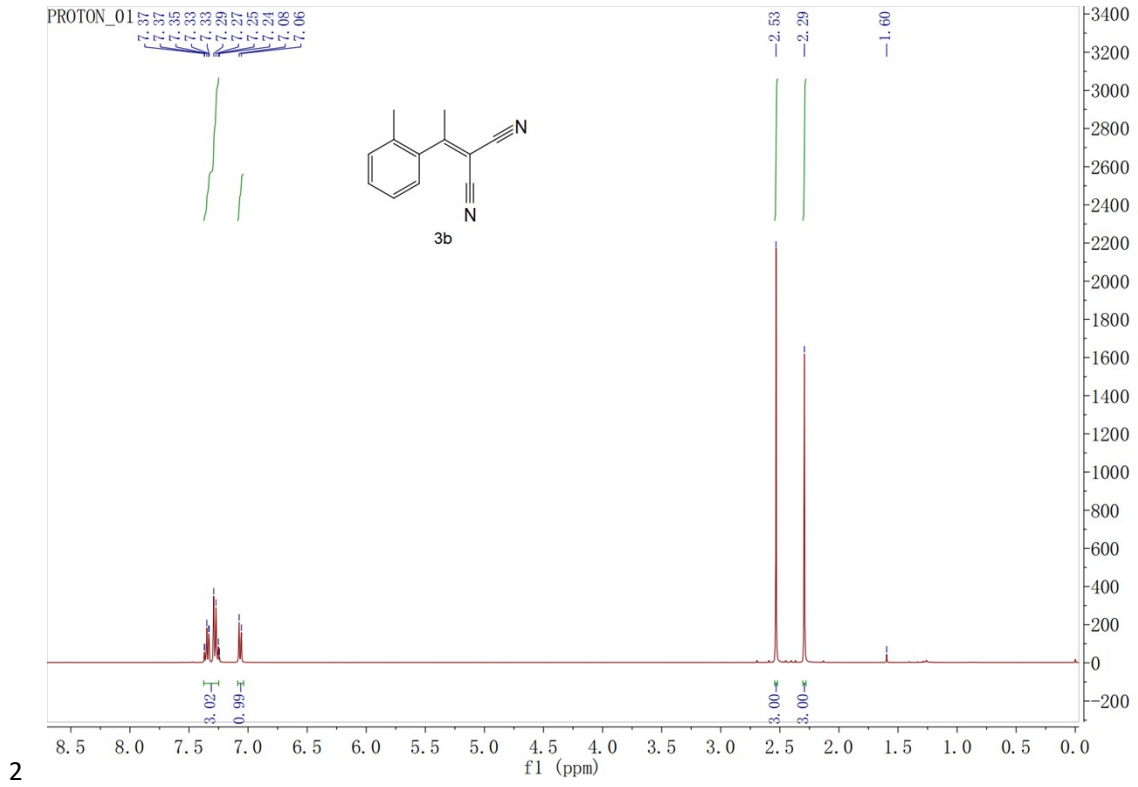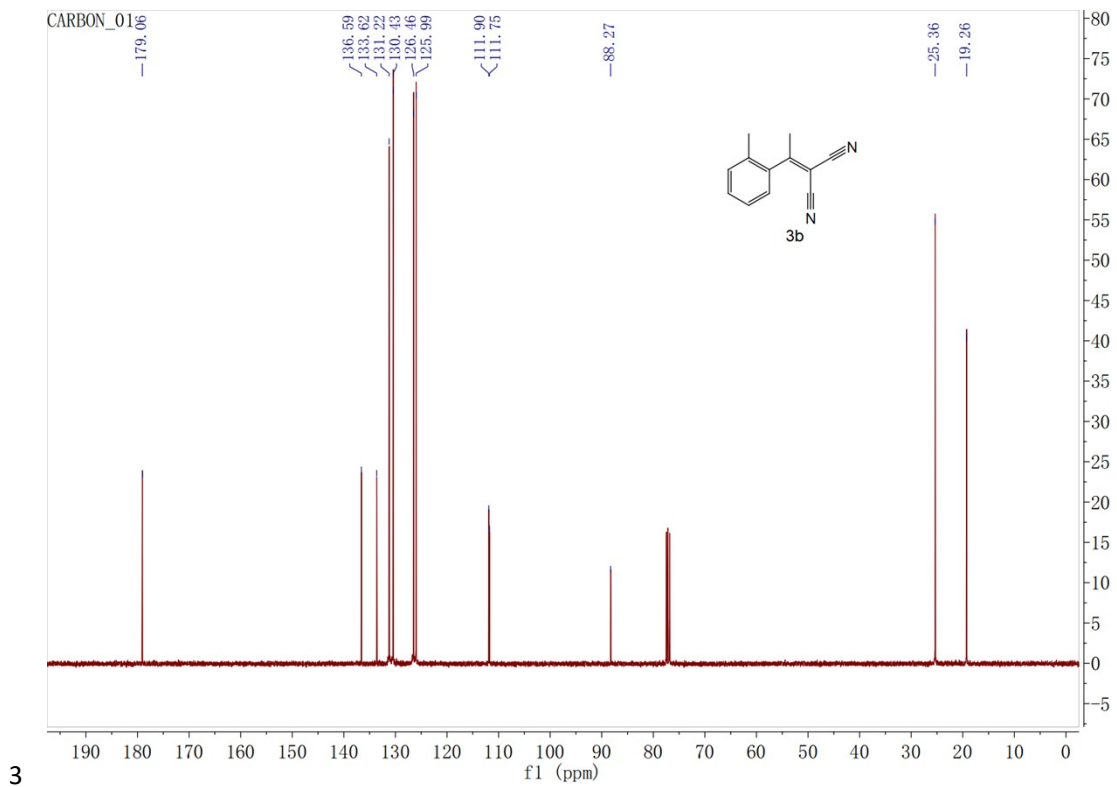

4

1 **2-(1-(m-tolyl)ethylidene)malononitrile (3c)**

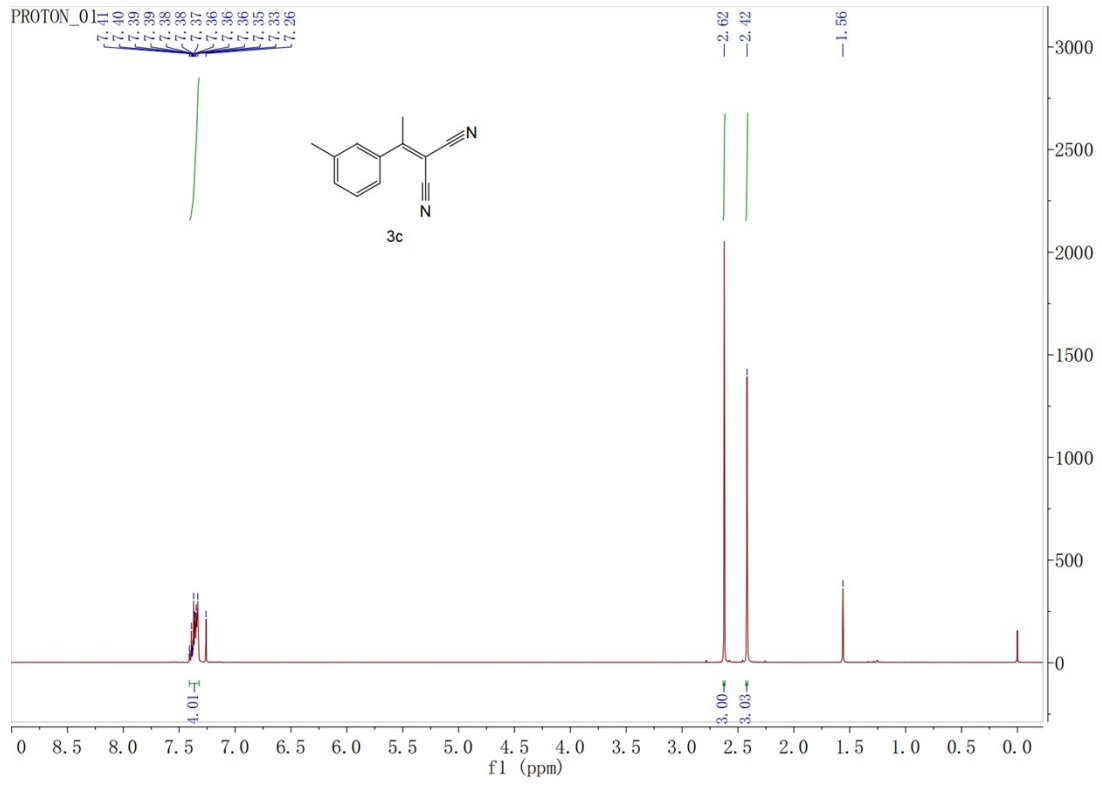

2

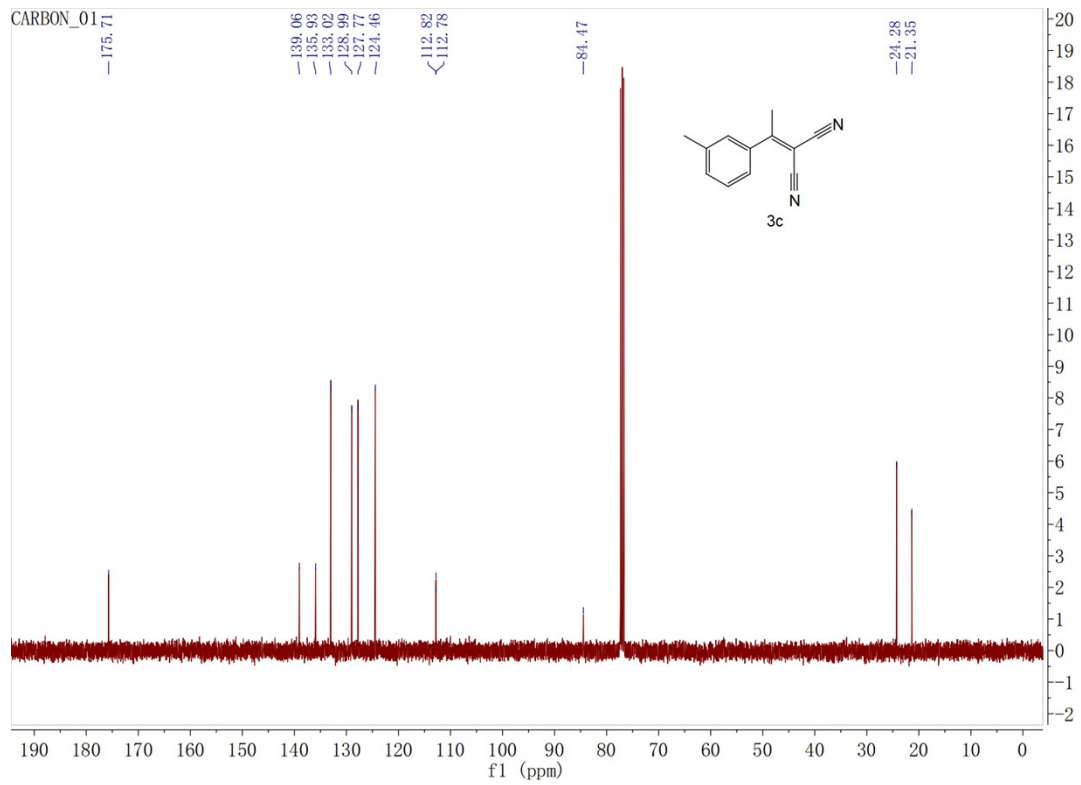

3

4

1 **2-(1-(p-tolyl)ethylidene)malononitrile (3d)**

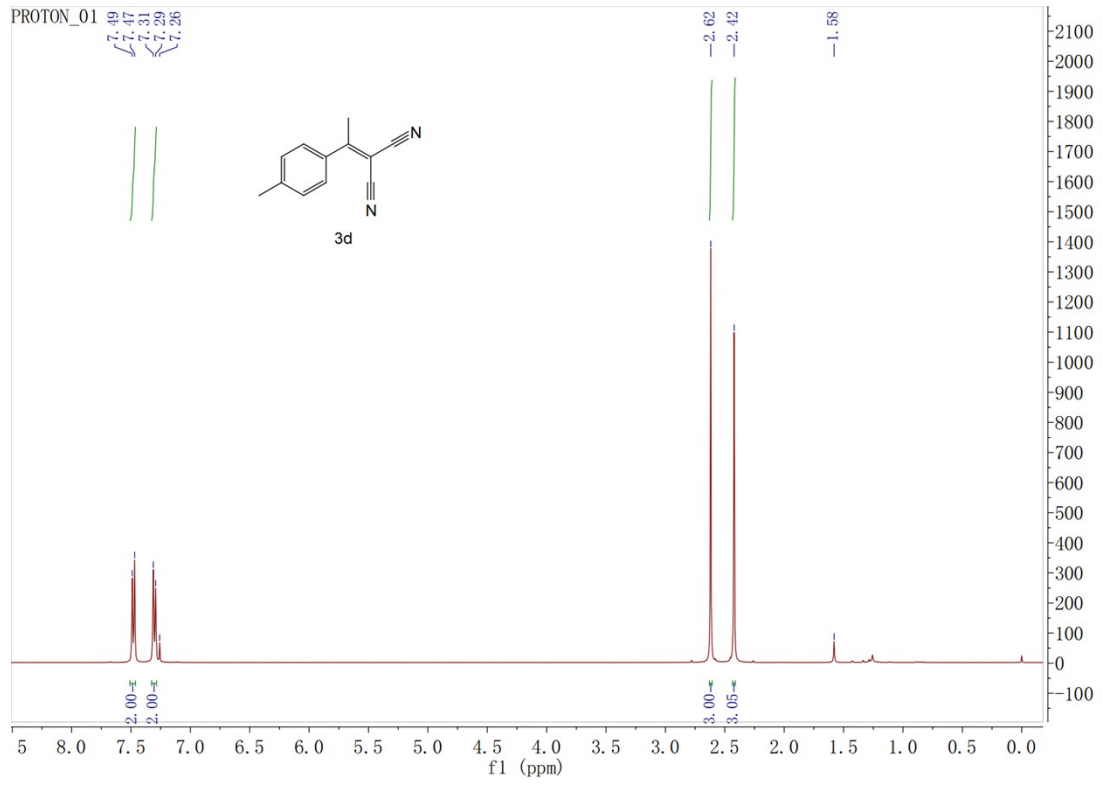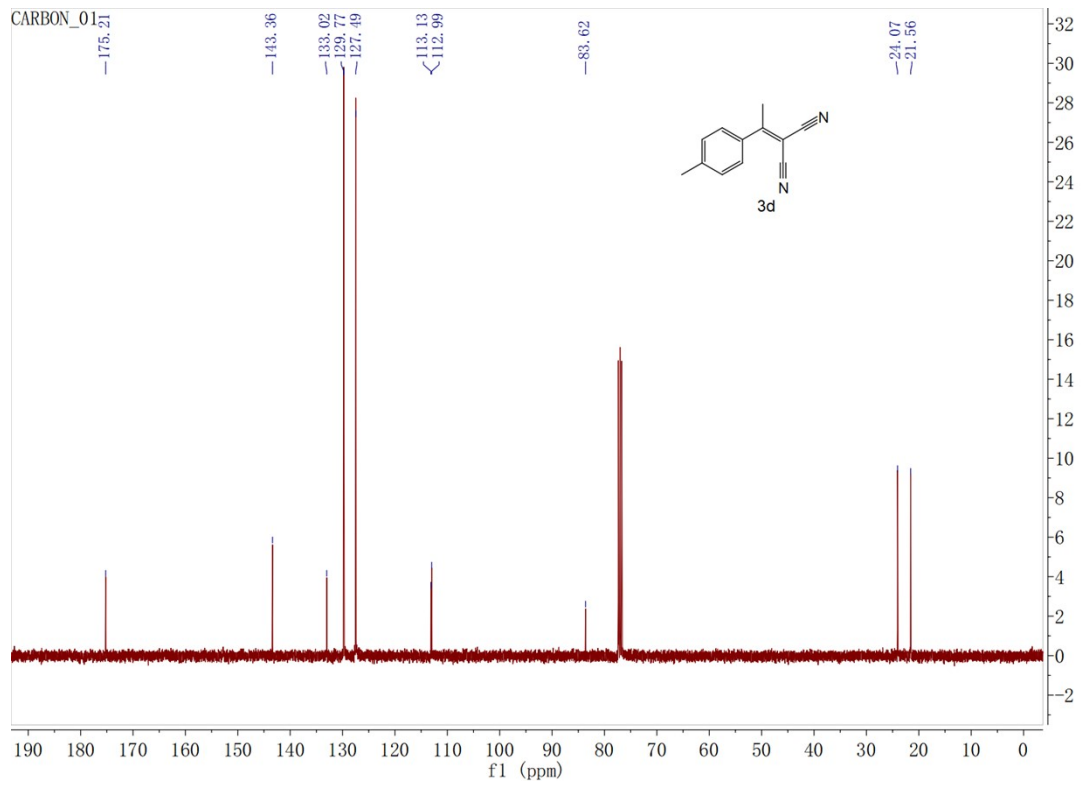



1 **2-(1-(2-fluorophenyl)ethylidene)malononitrile (3e)**

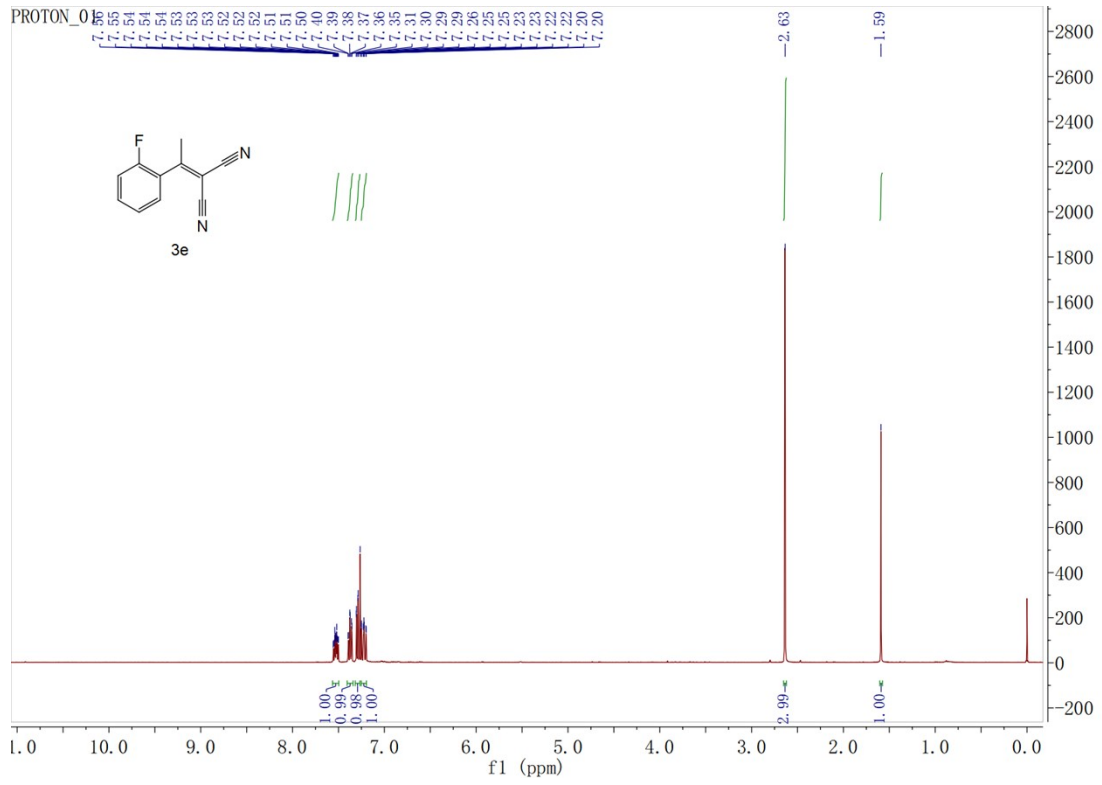

2

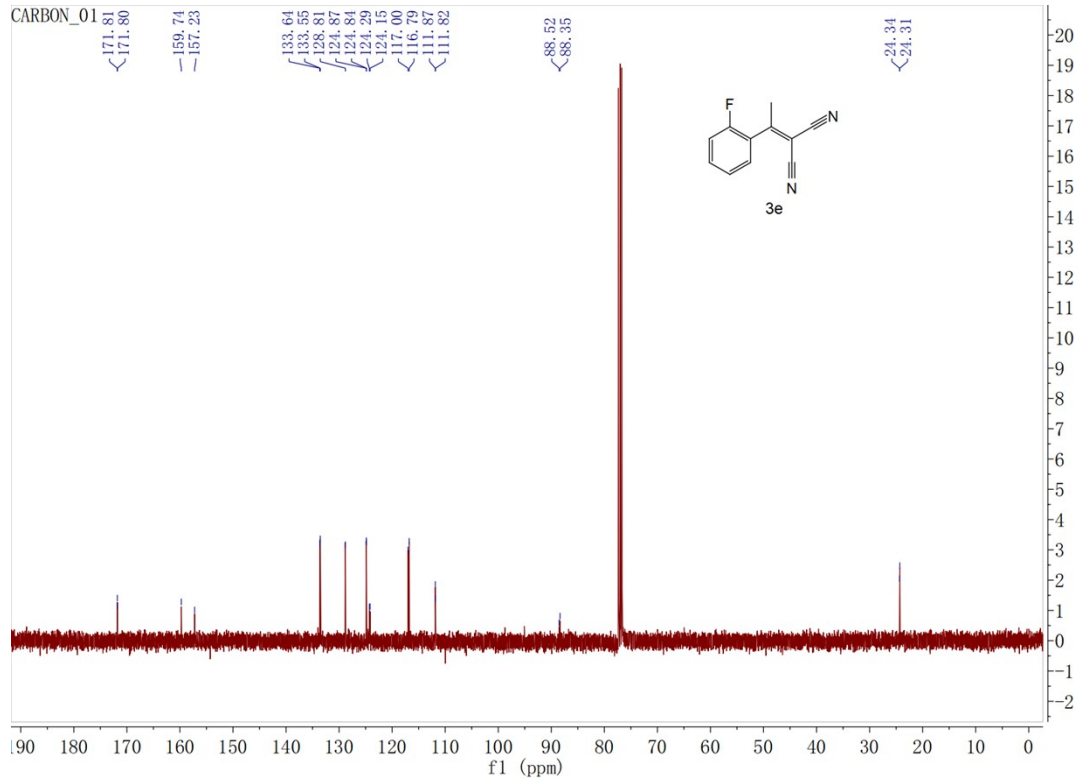

3

4

# 1 2-(1-(3-fluorophenyl)ethylidene)malononitrile (3f)

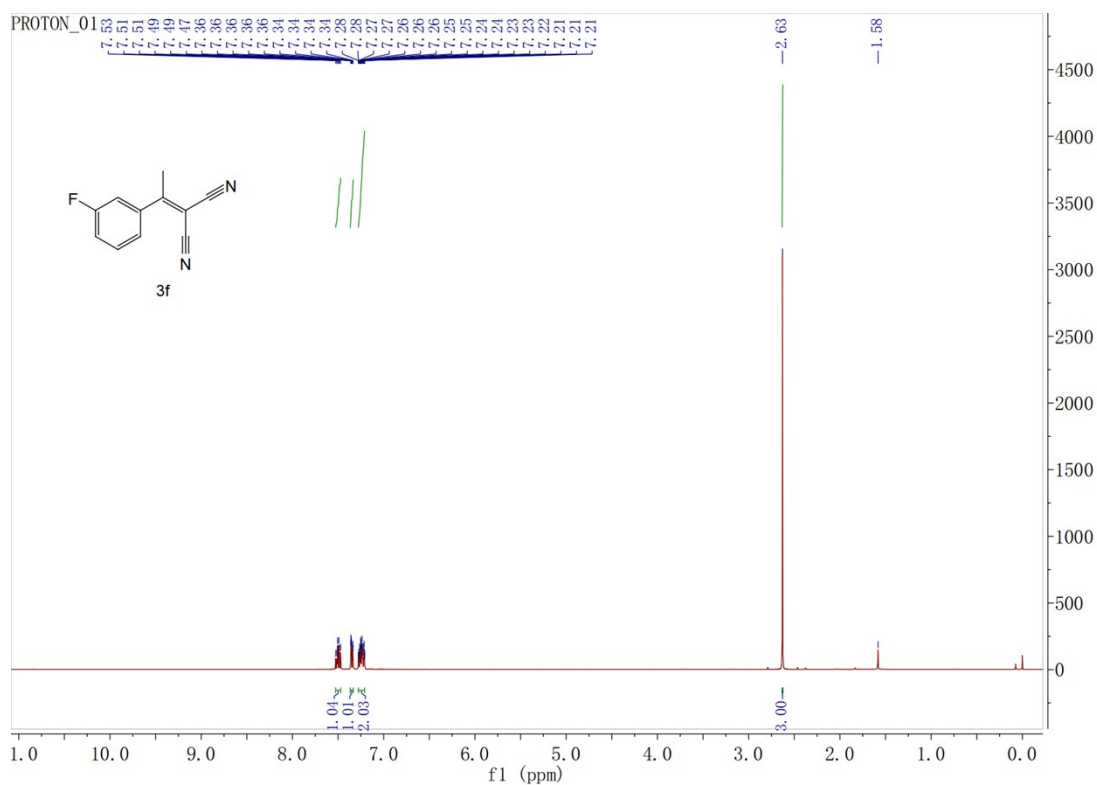

2

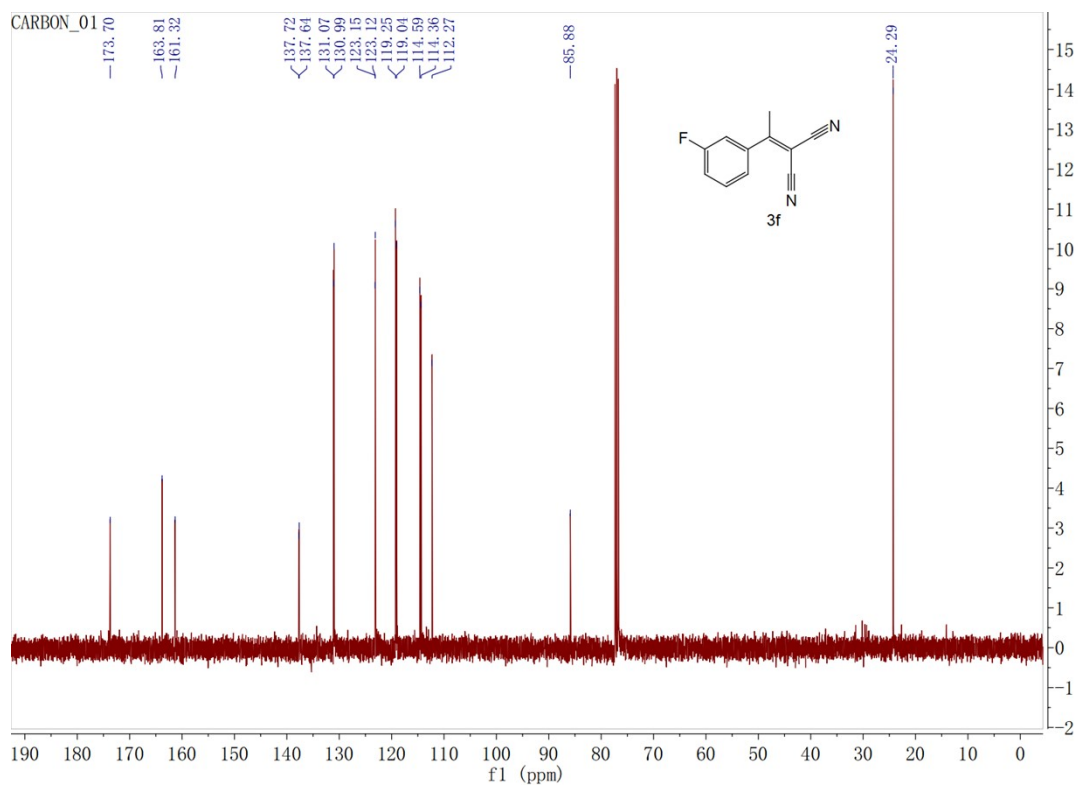

3

4

1 **2-(1-(4-fluorophenyl)ethylidene)malononitrile (3g)**

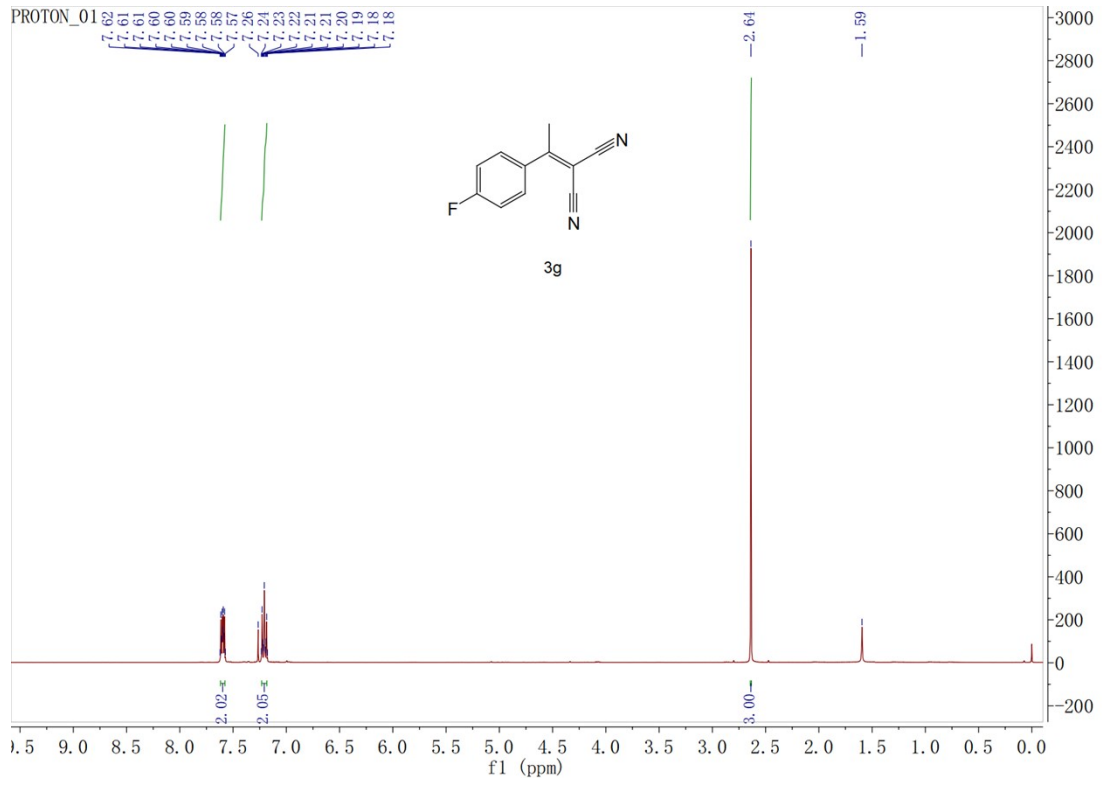

2

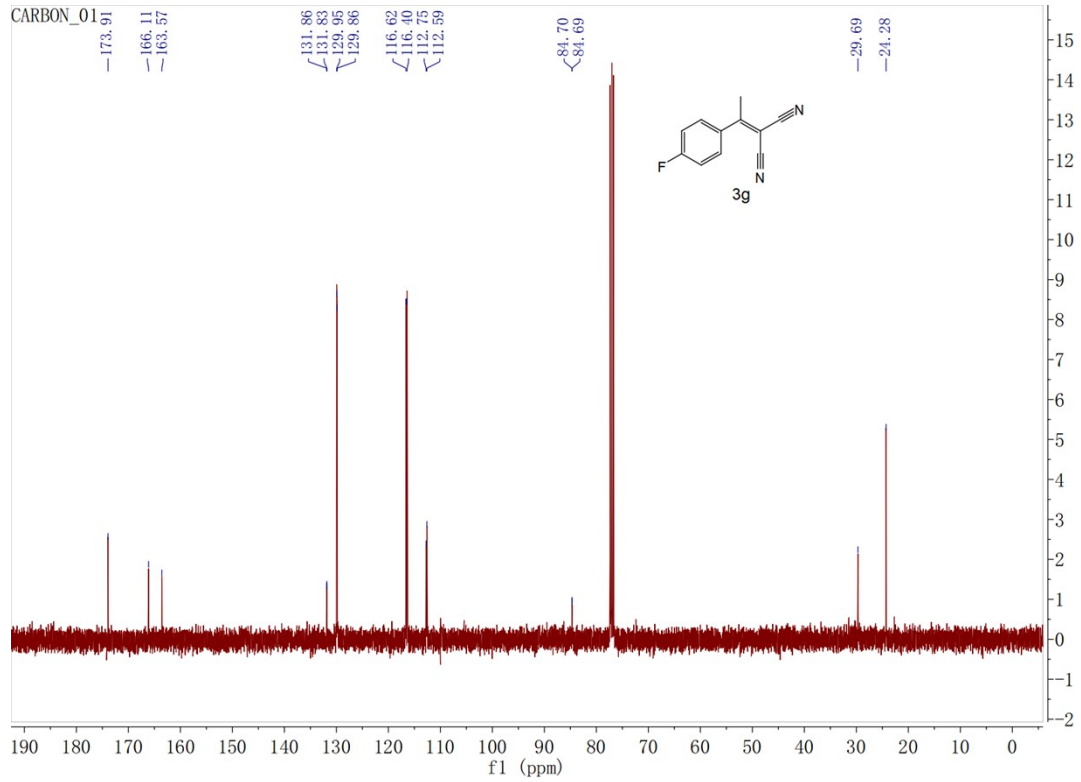

3

4

1 **2-(1-(2-bromophenyl)ethylidene)malononitrile (3h)**

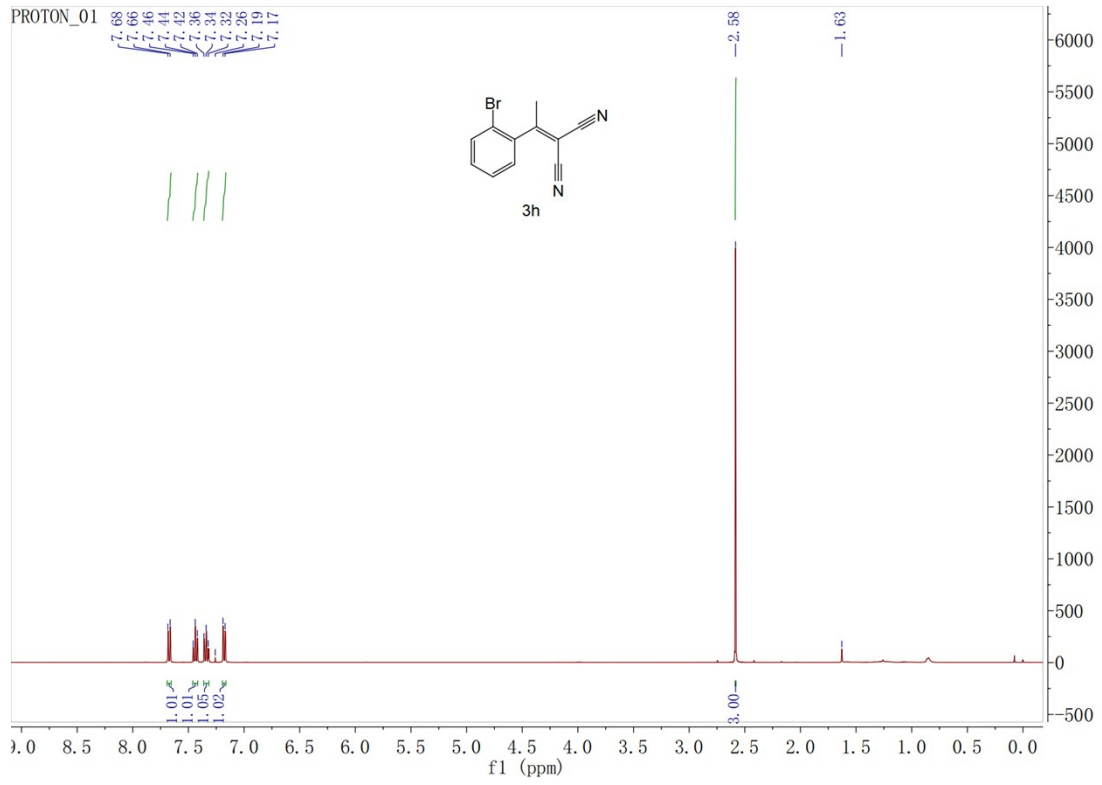

2

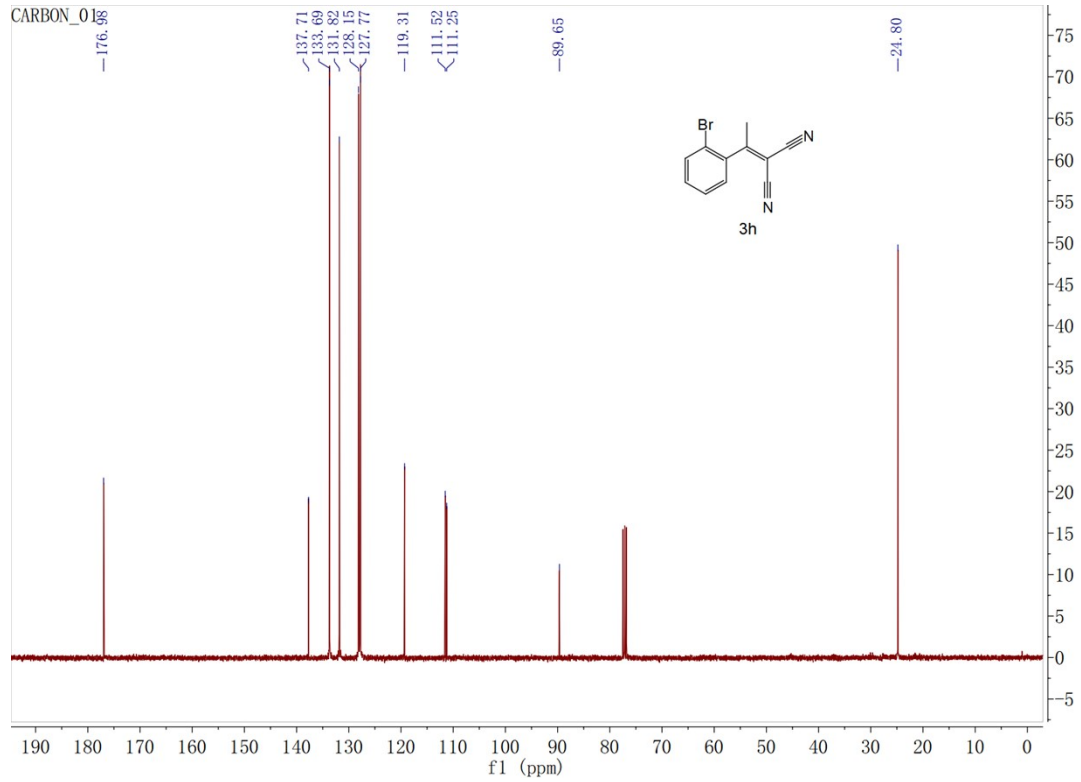

3

4

1 **2-(1-(4-chlorophenyl)ethylidene)malononitrile (3i)**

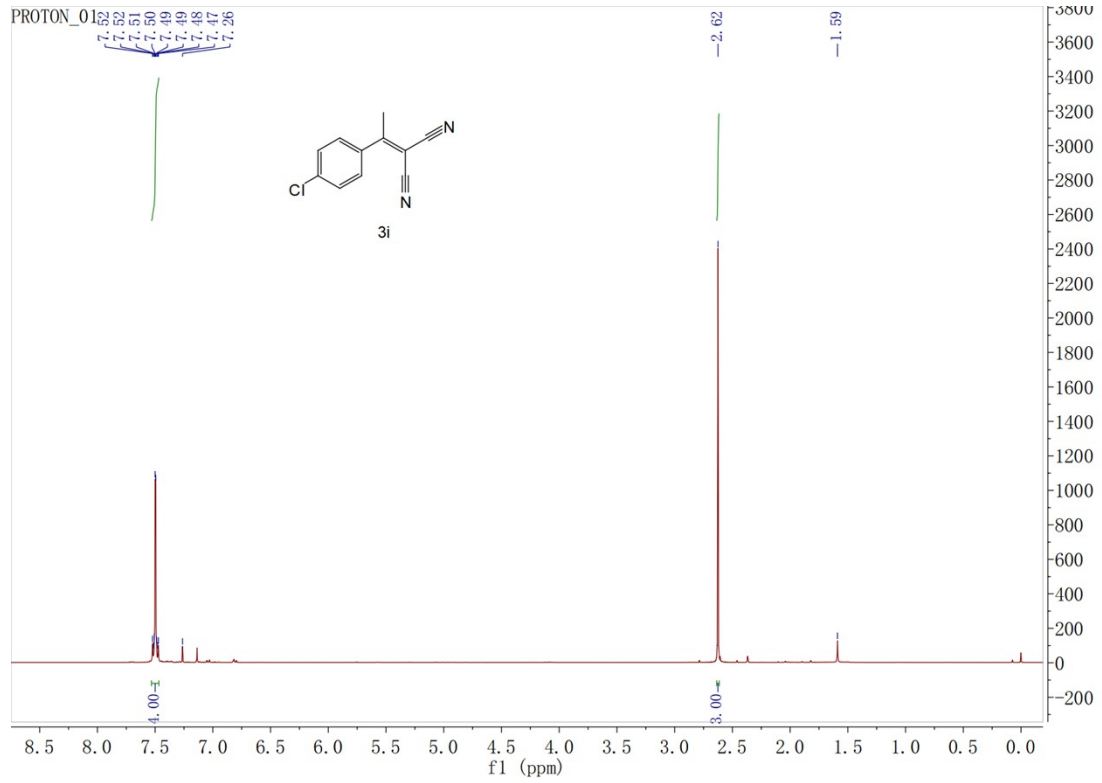

2

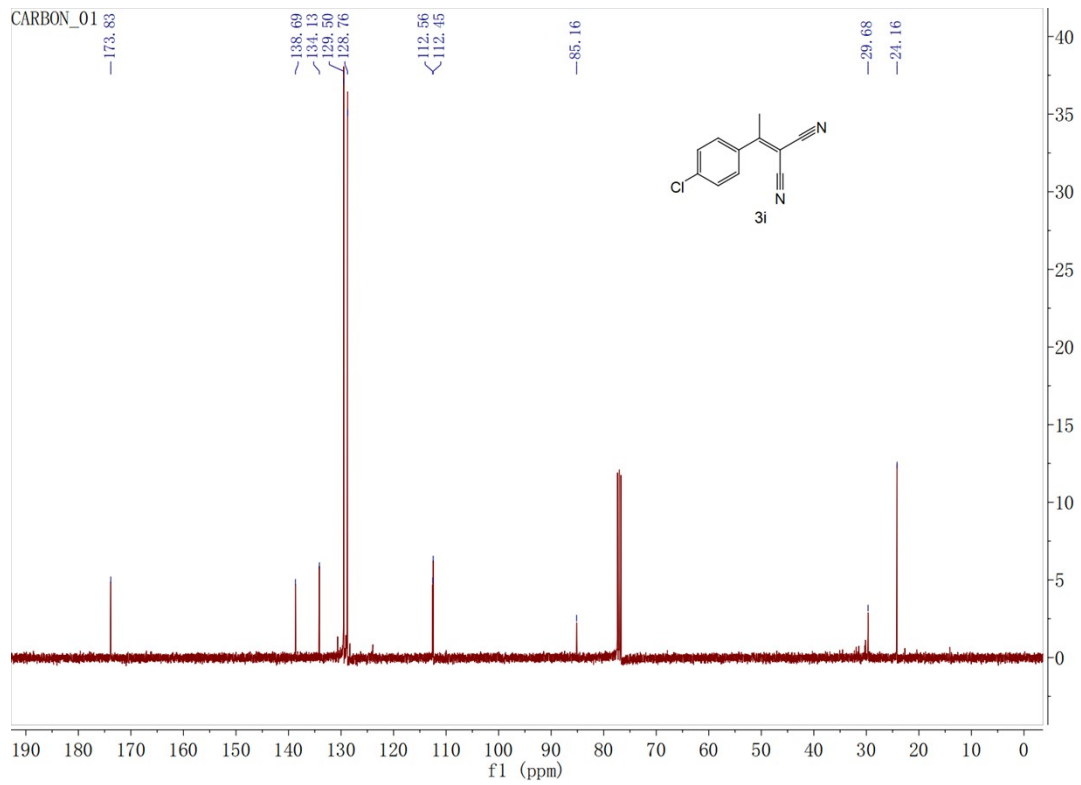

3

4

1 **2-(1-(4-bromophenyl)ethylidene)malononitrile (3j)**

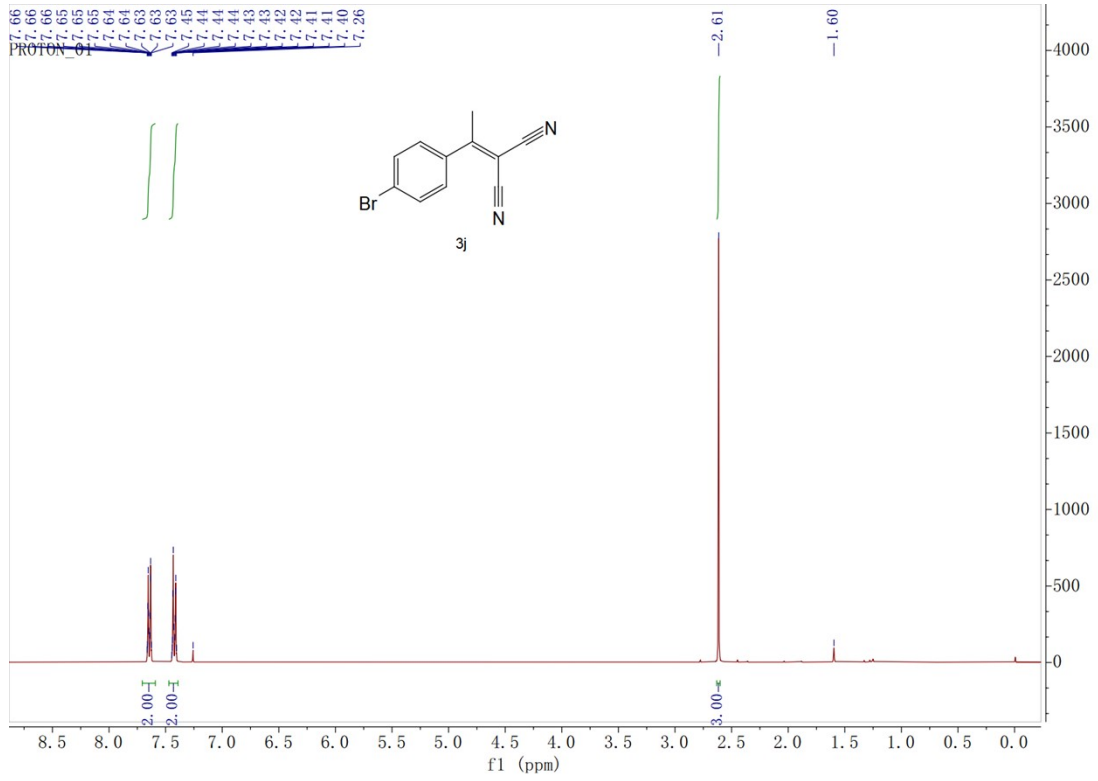

2

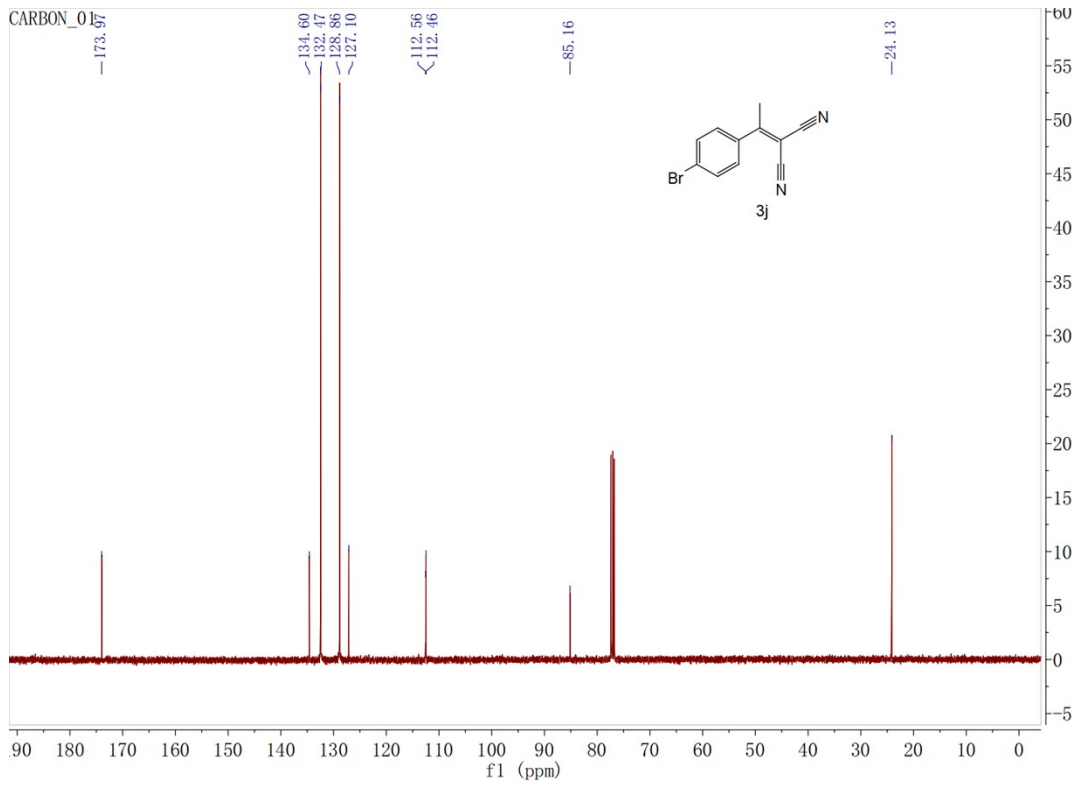

3

4

1 **2-(1-(4-(trifluoromethyl)phenyl)ethylidene)malononitrile (3k)**

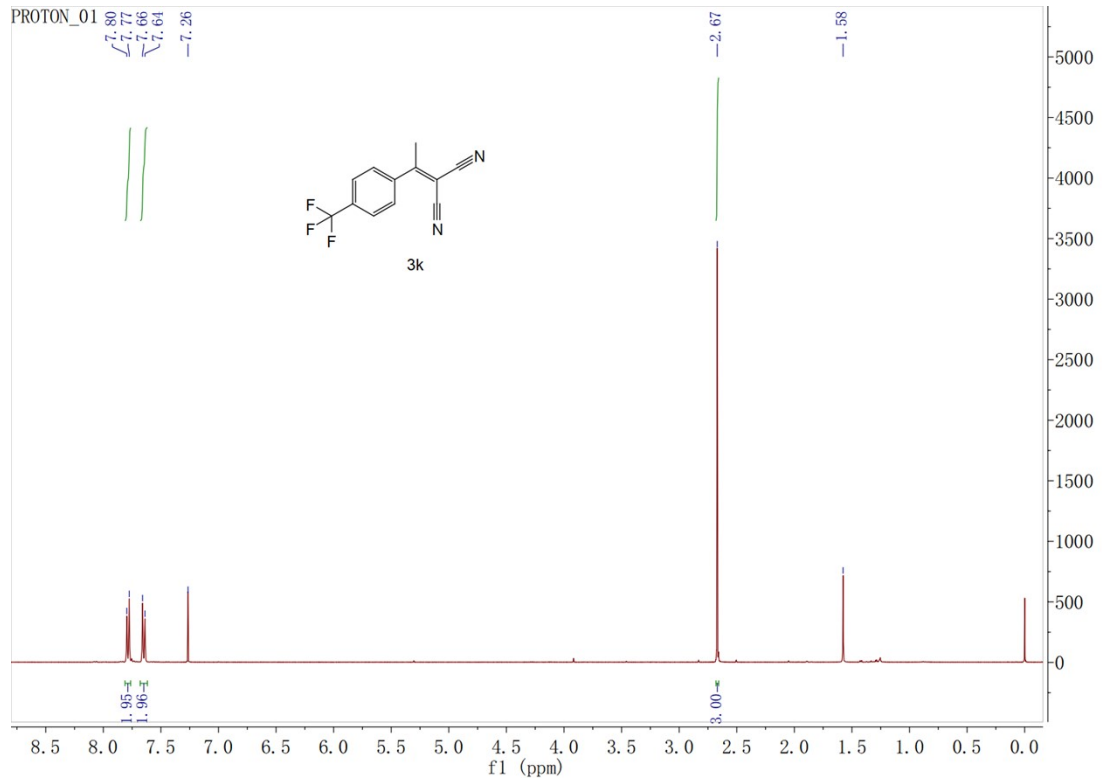

2

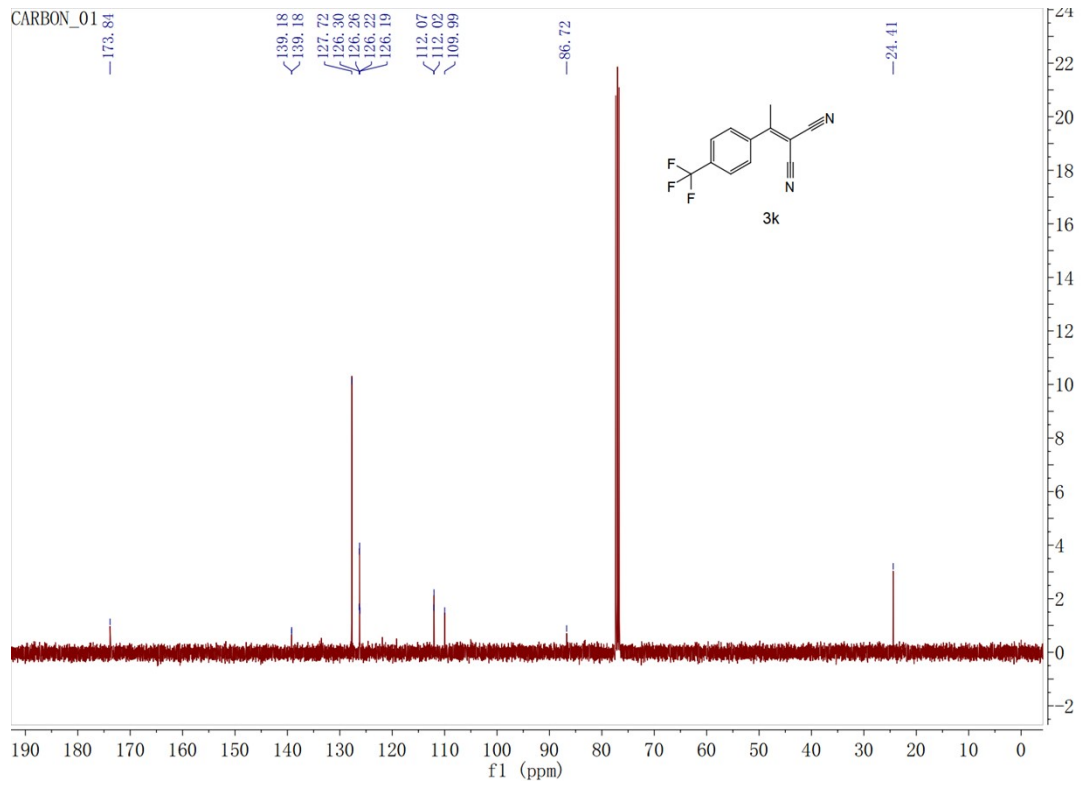

3

4

1 **2-(1-(4-methoxyphenyl)ethylidene)malononitrile (31)**

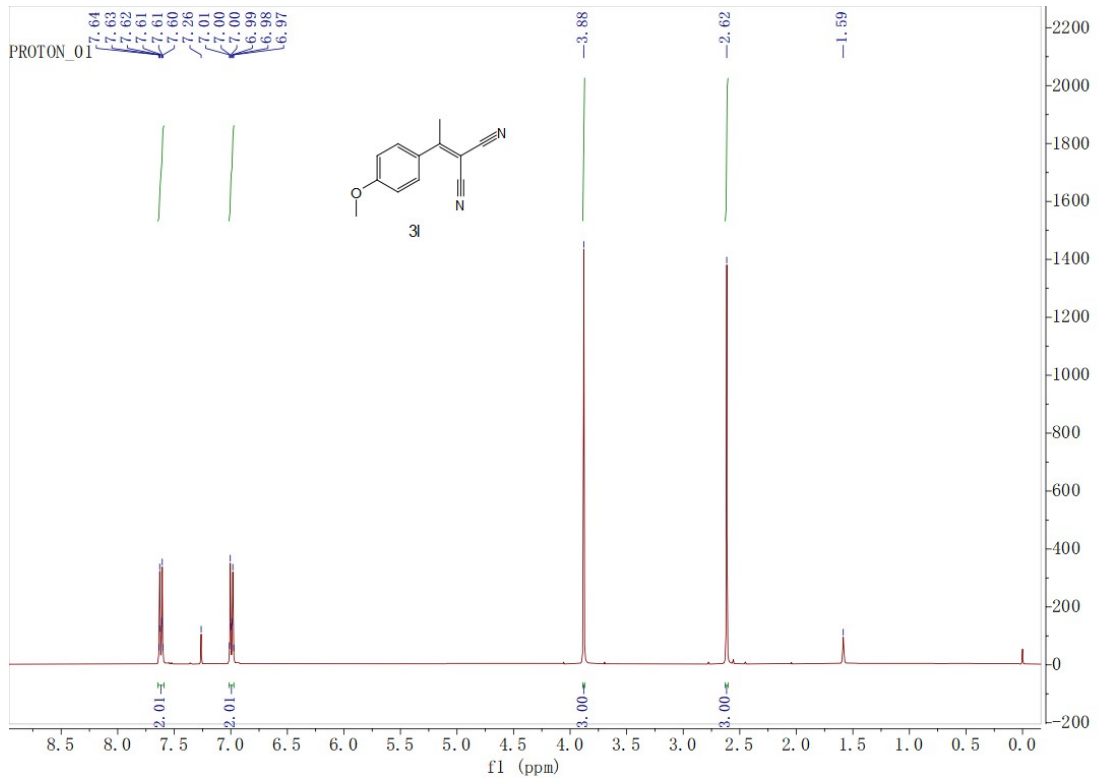

2

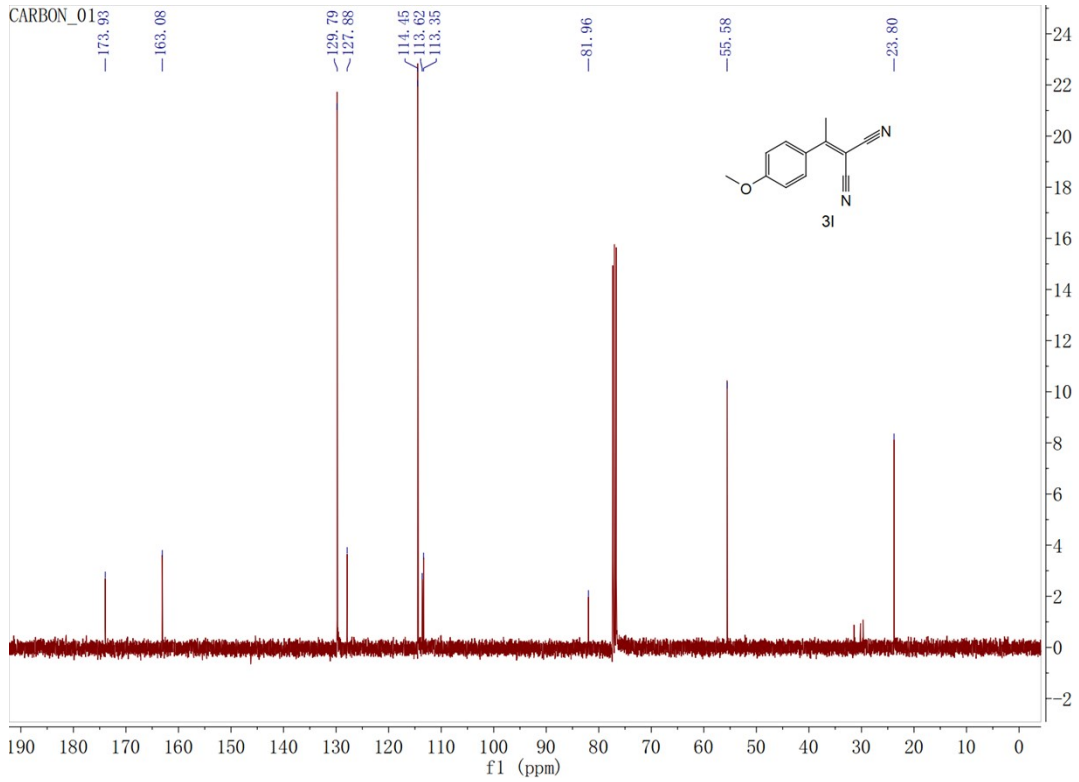

3

4



1 **2-(1-(4-(methylthio)phenyl)ethylidene)malononitrile (3m)**

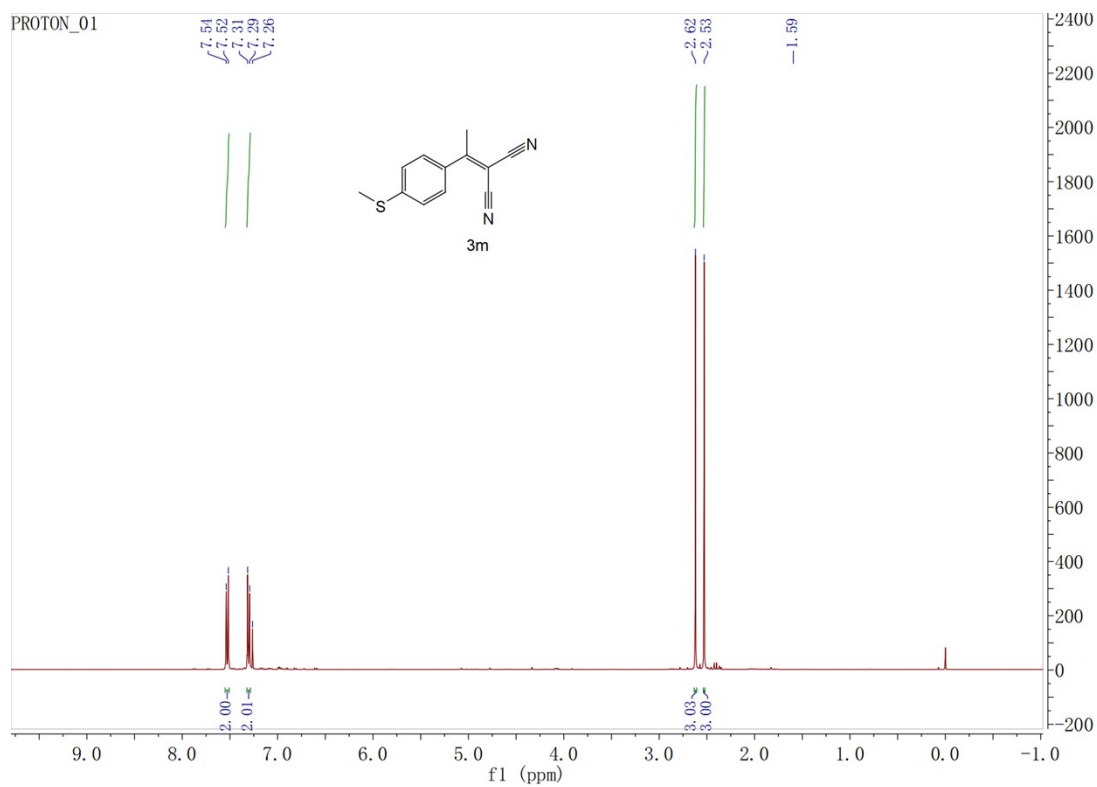

2

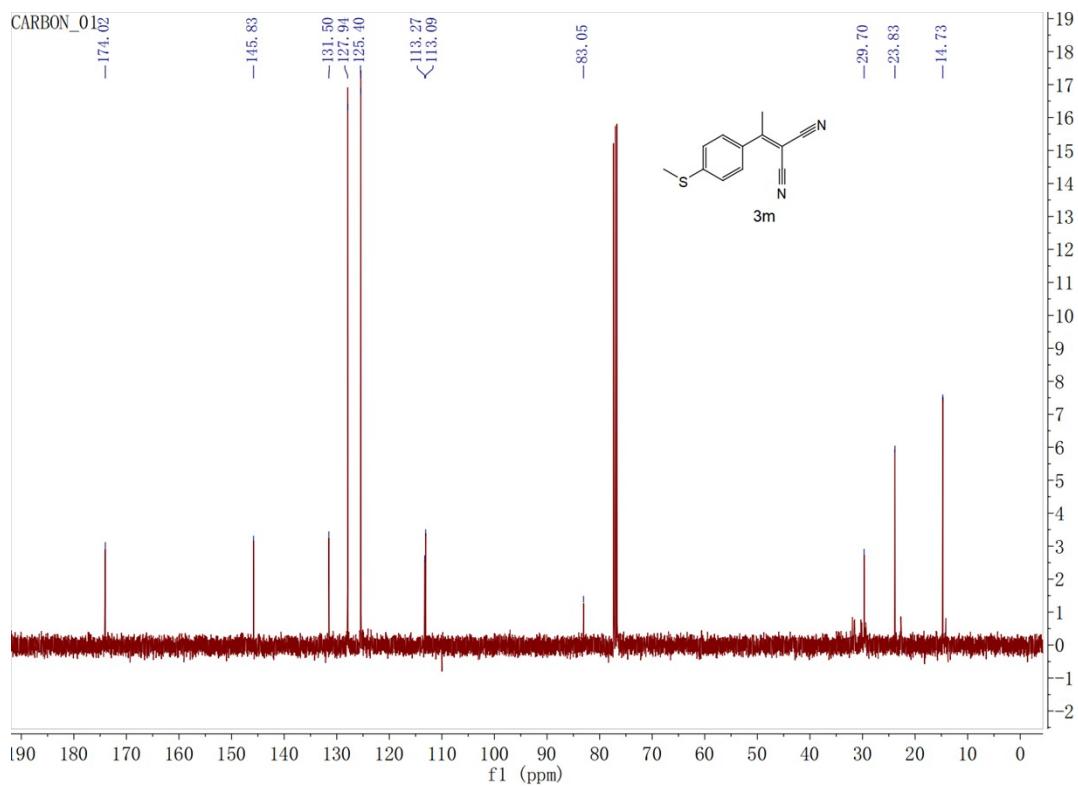

3

4

# 1 2-(1-(thiophen-2-yl)ethylidene)malononitrile (3n)

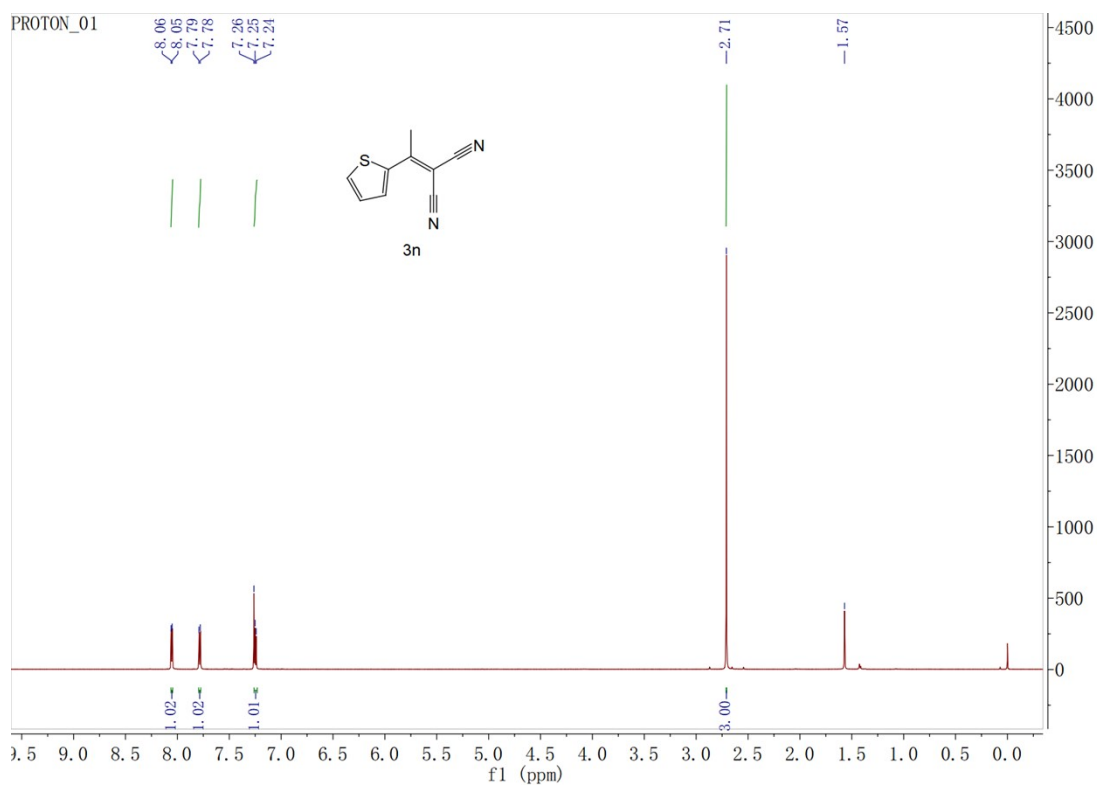

2

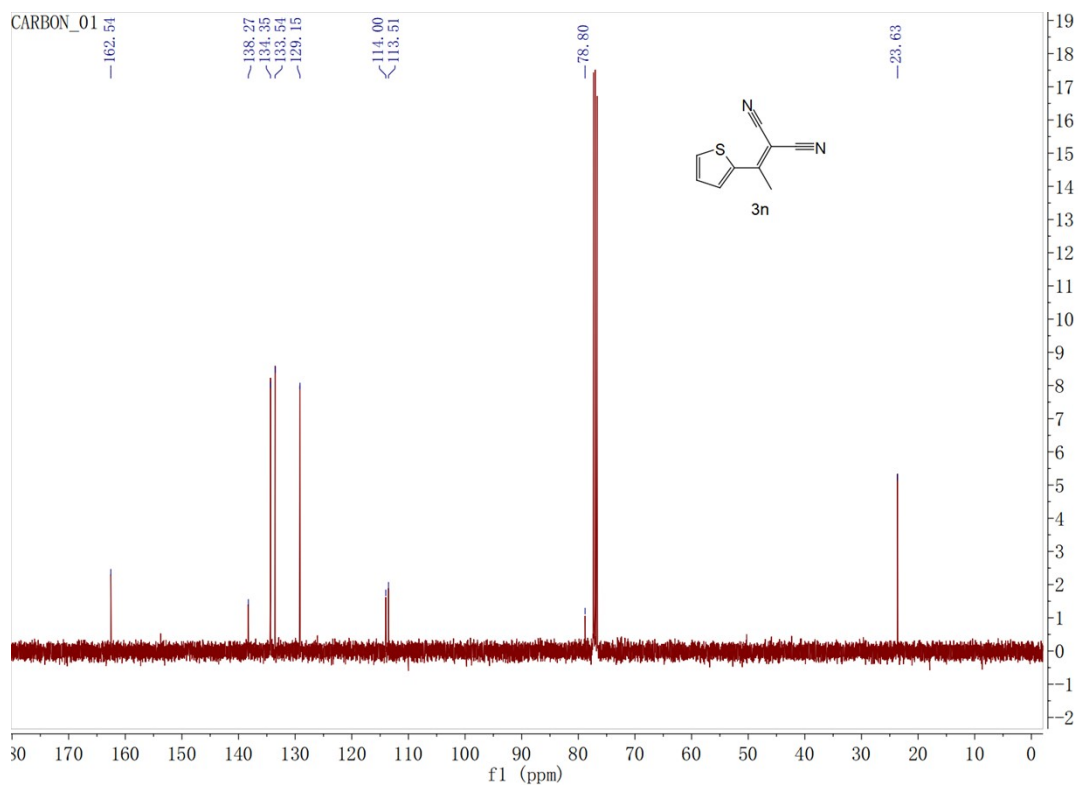

3

4

1 ethyl (E)-2-cyano-3-phenylacrylate (30)

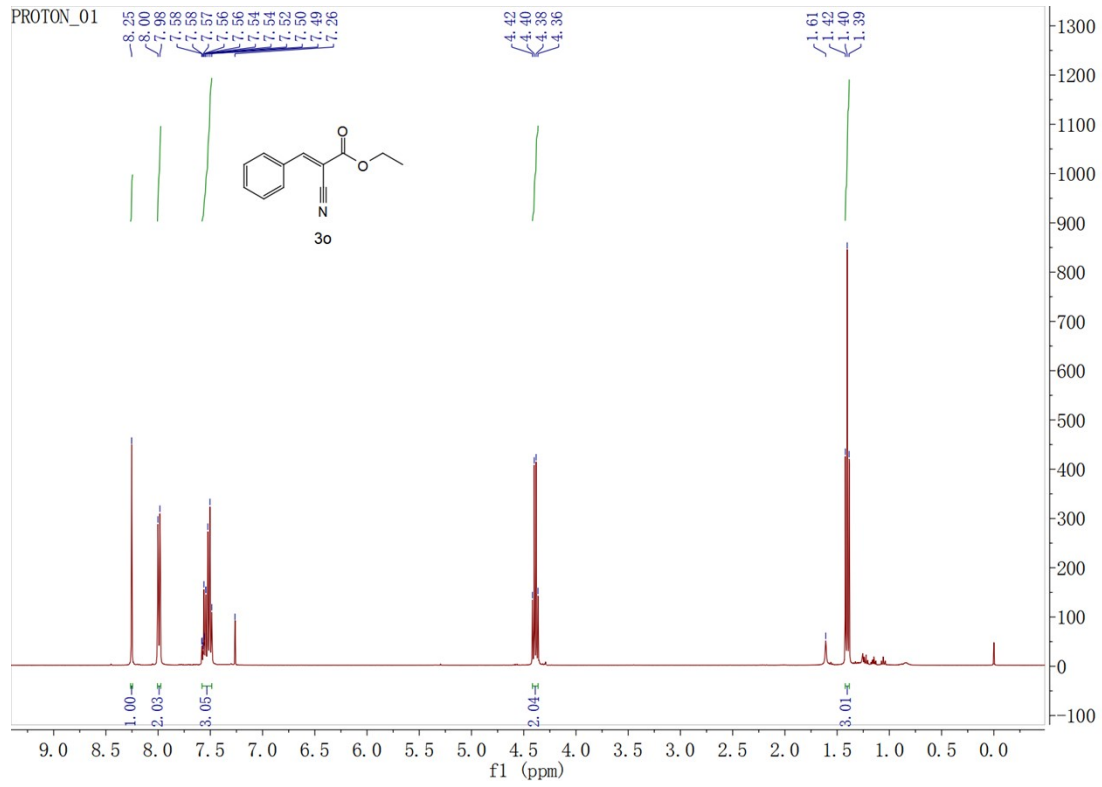

2

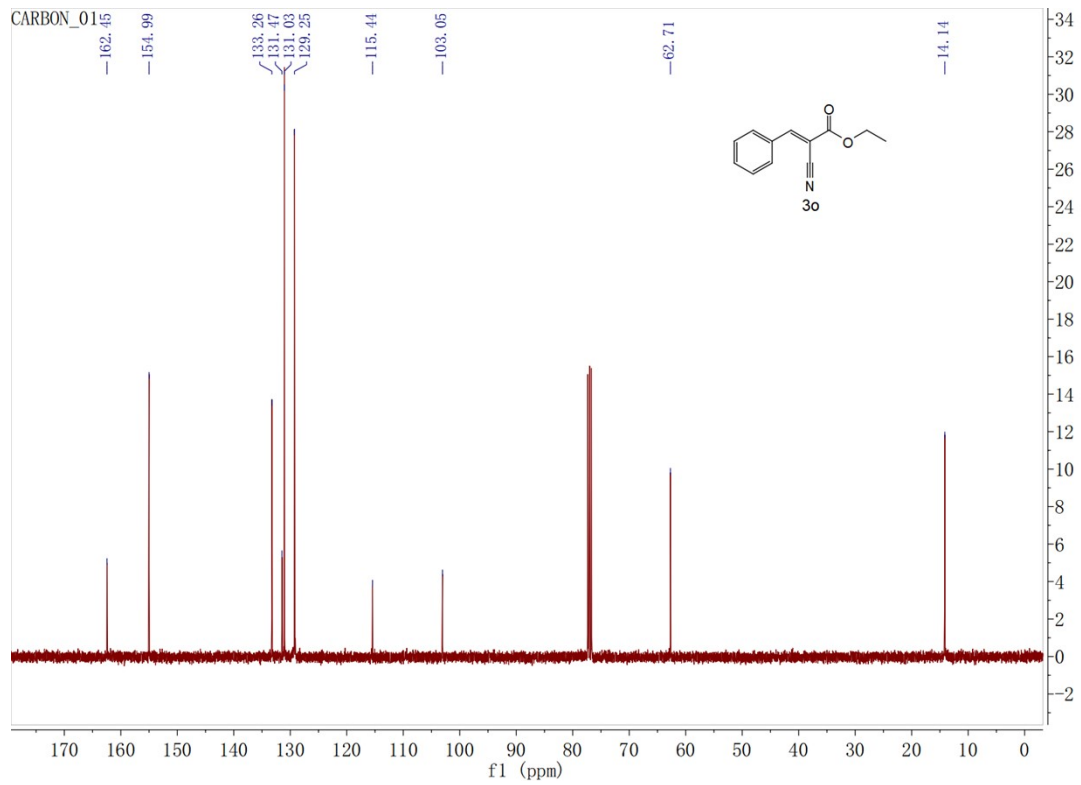

3

4

1 **2-(1-phenylethyl)malononitrile (4a)**

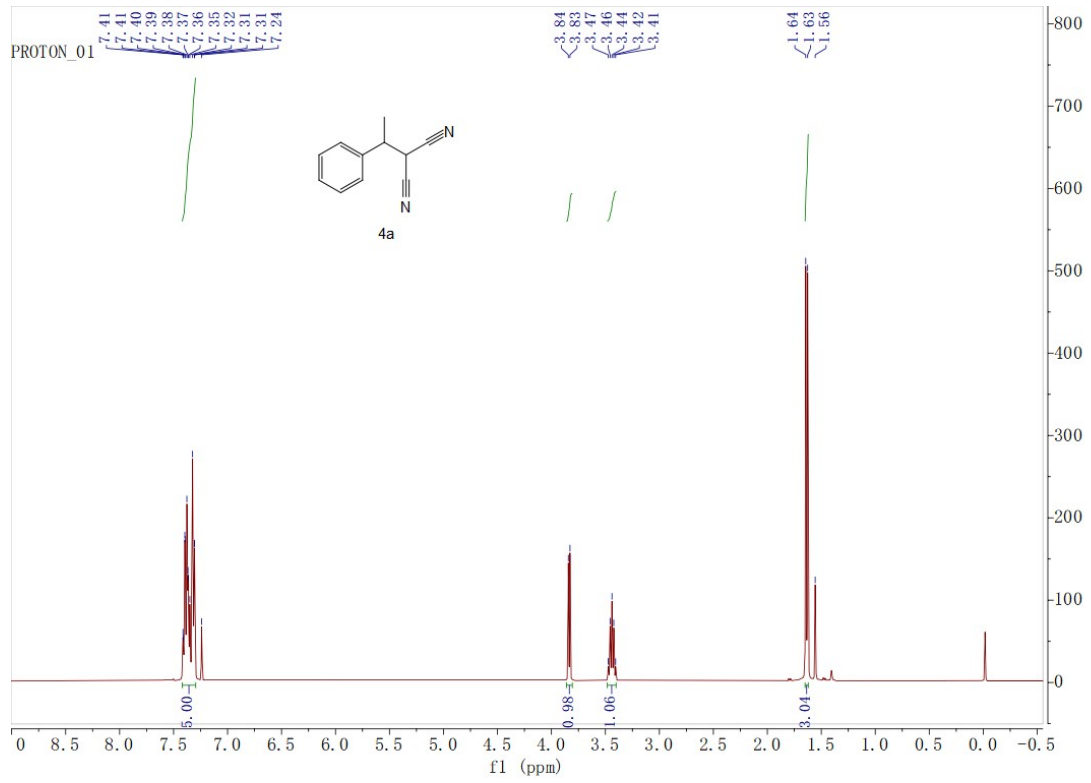

2

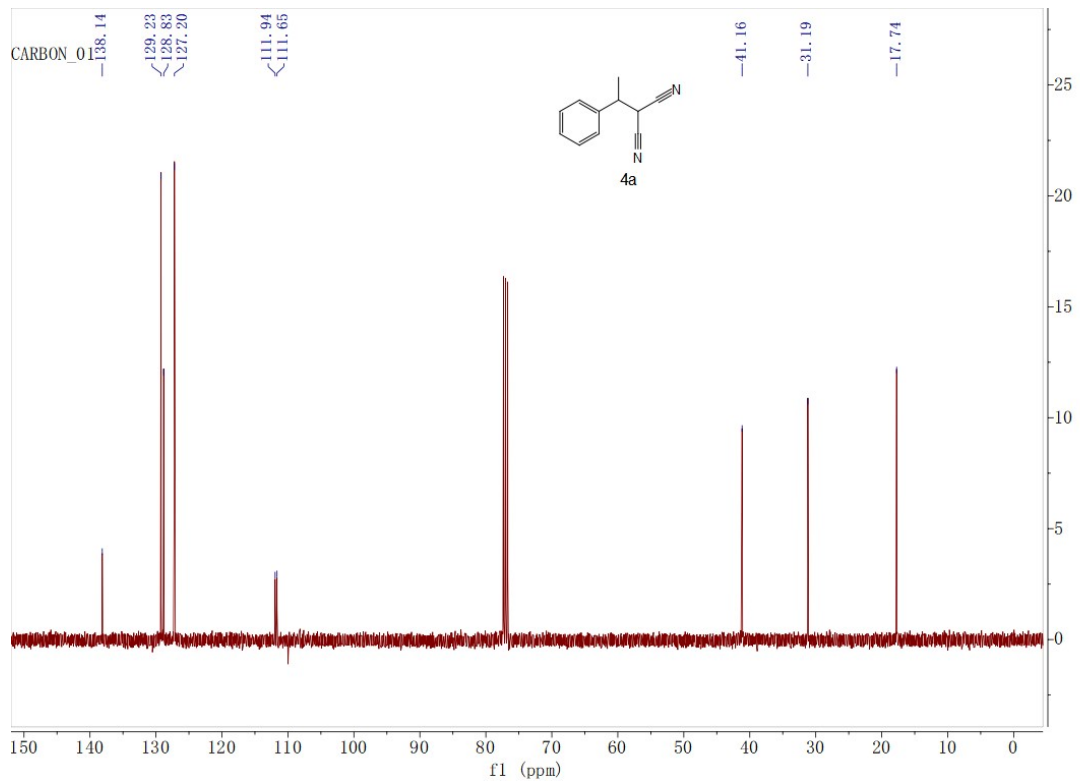

3

4

1 **2-(1-(o-tolyl)ethyl)malononitrile (4b)**

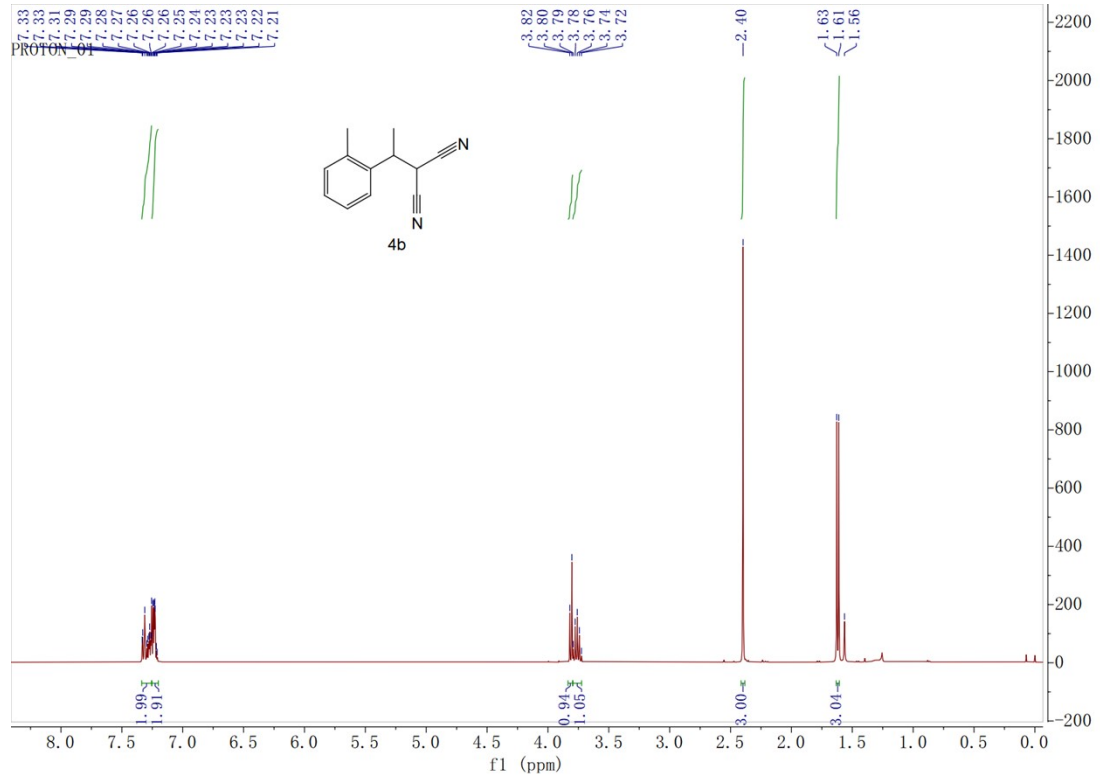

2

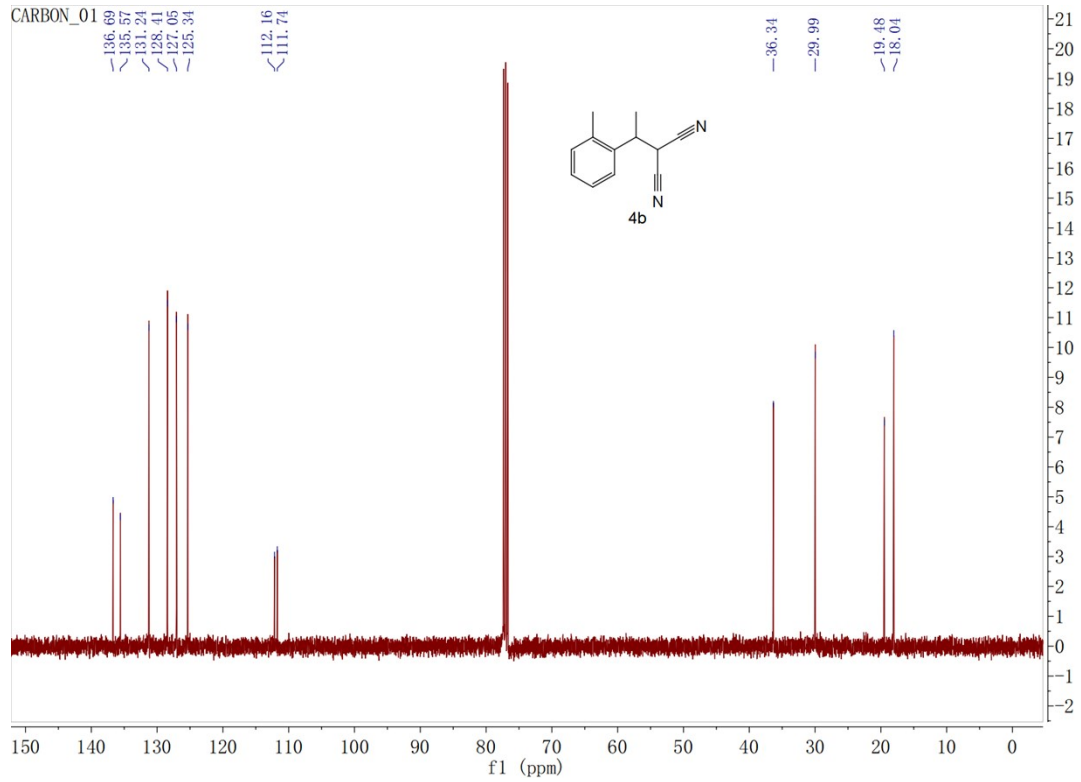

3

4

1 **2-(1-(m-tolyl)ethyl)malononitrile (4c)**

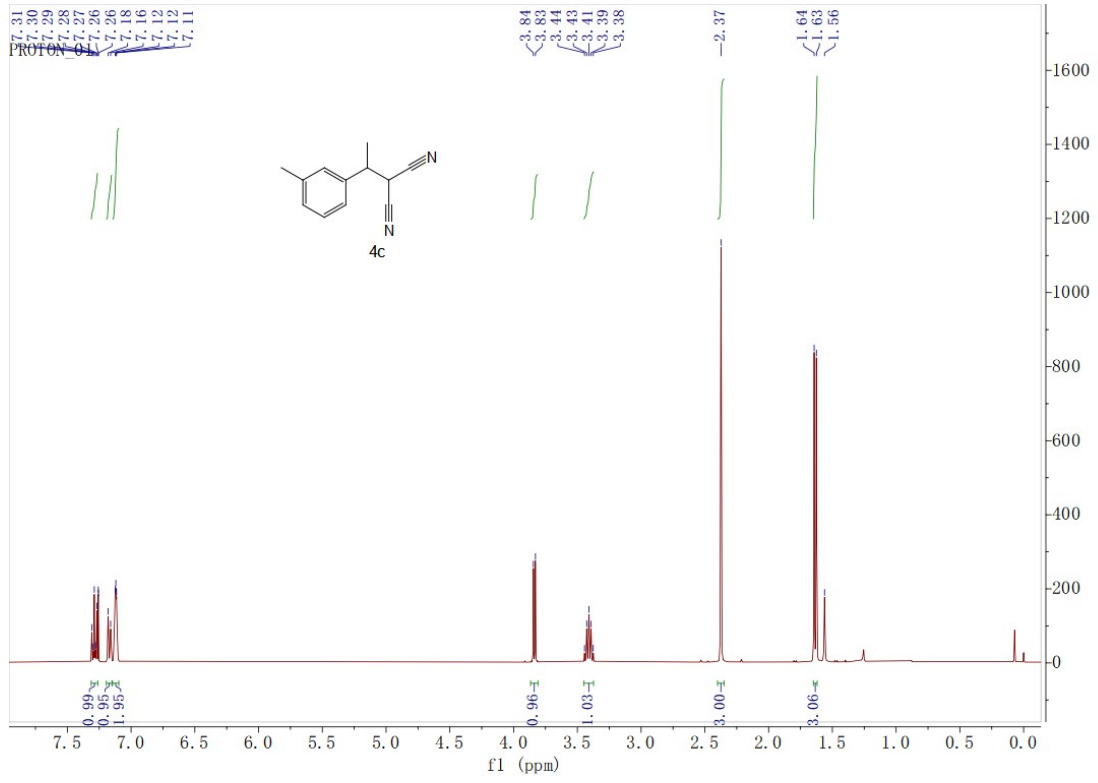

2

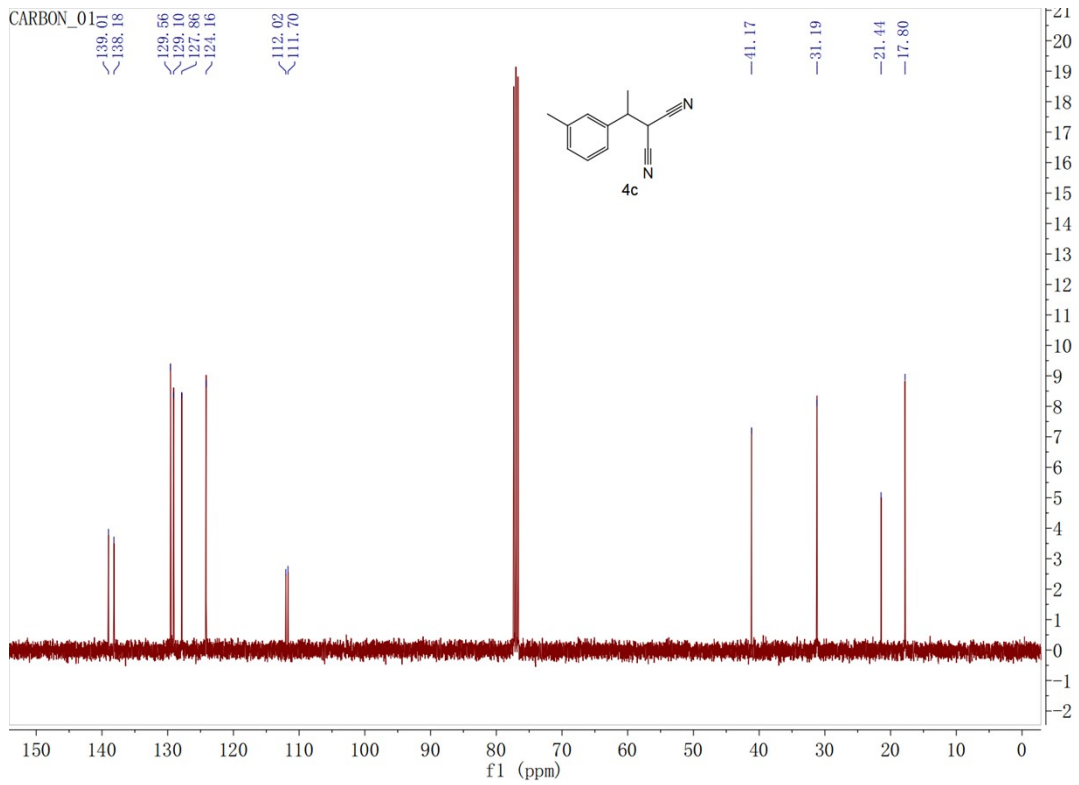

3

4

1 **2-(1-(p-tolyl)ethyl)malononitrile (4d)**

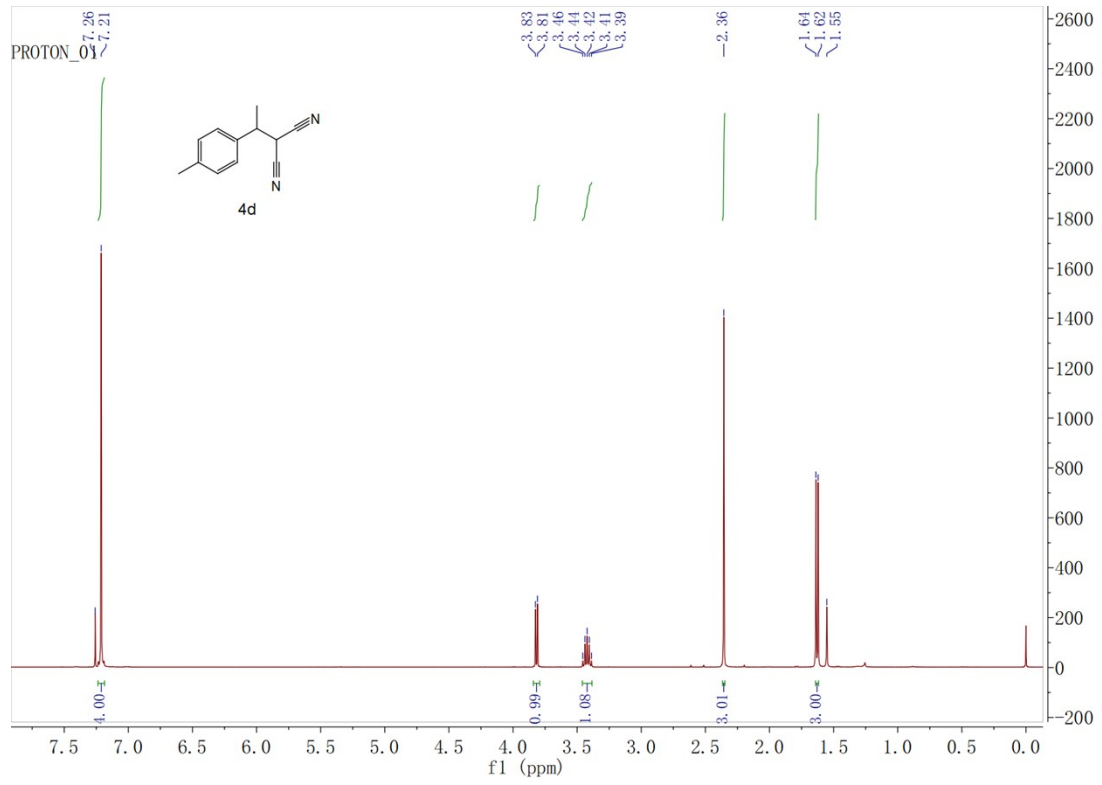

2

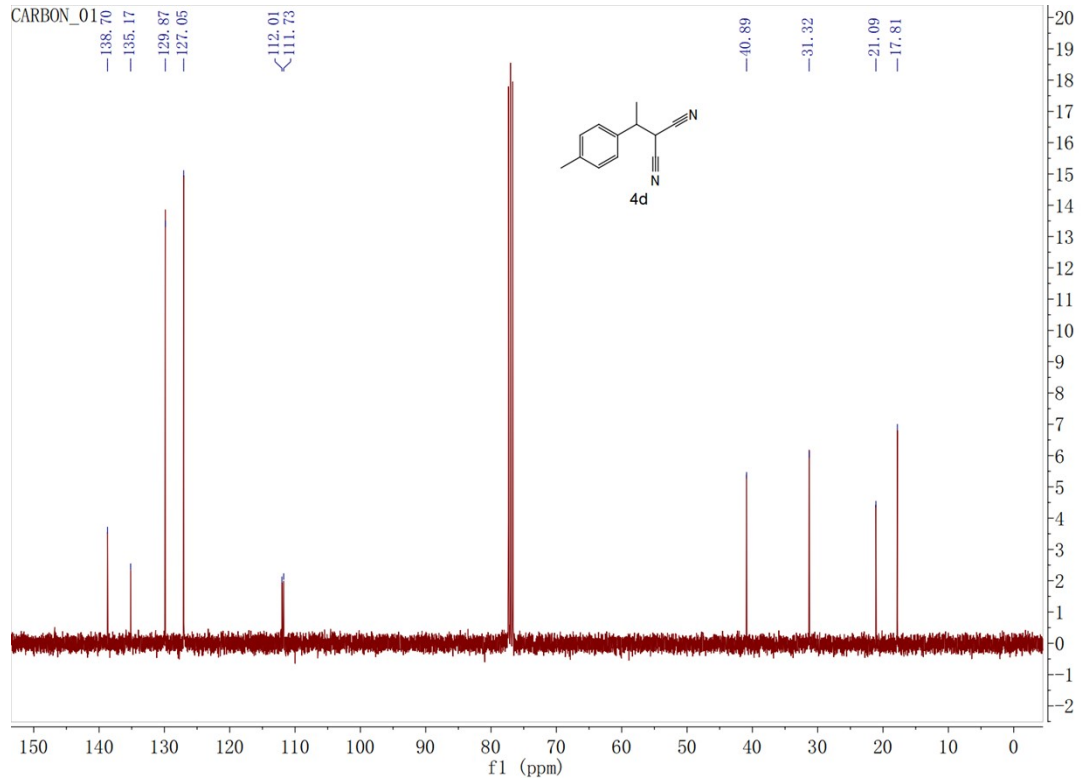

3

4

1 **2-(1-(2-fluorophenyl)ethyl)malononitrile (4e)**

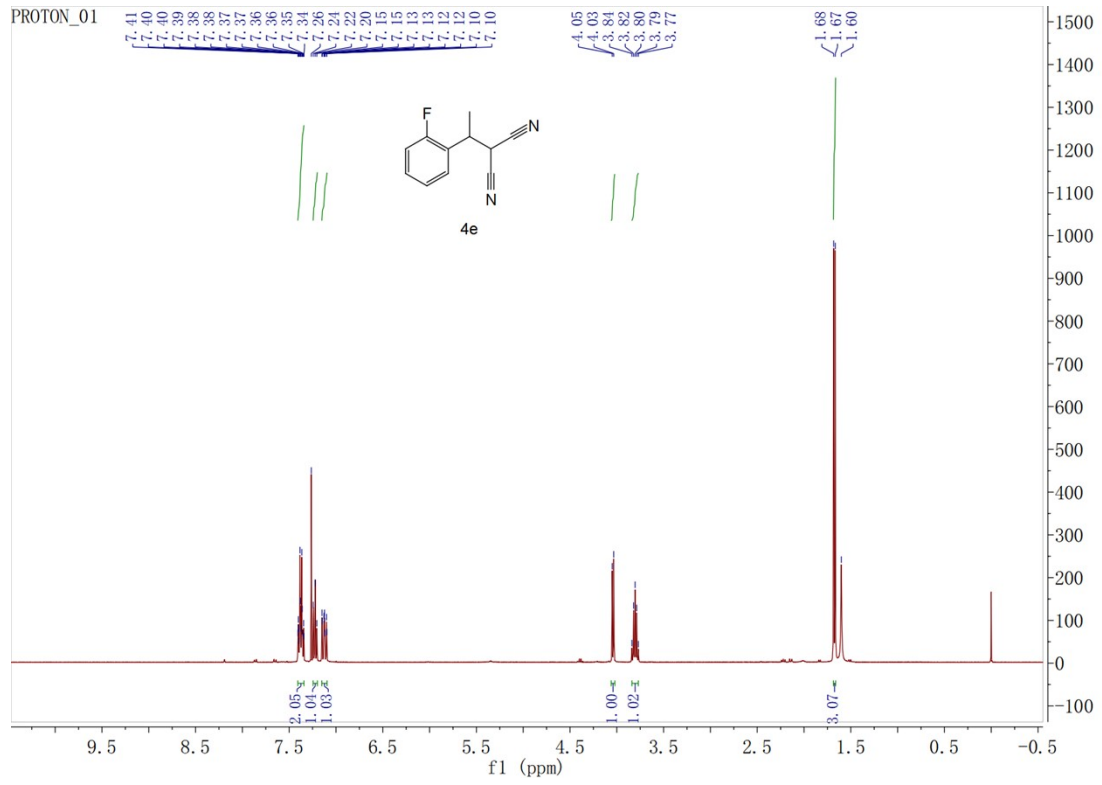

2

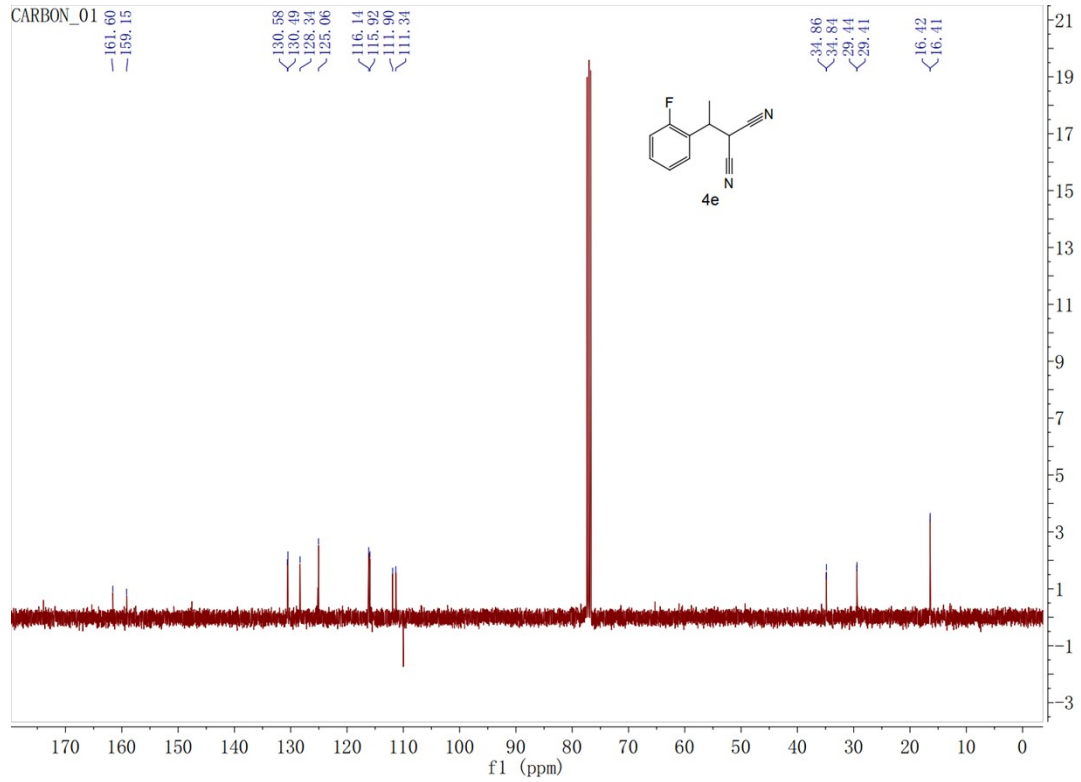

3

4



1 **2-(1-(3-fluorophenyl)ethyl)malononitrile (4f)**

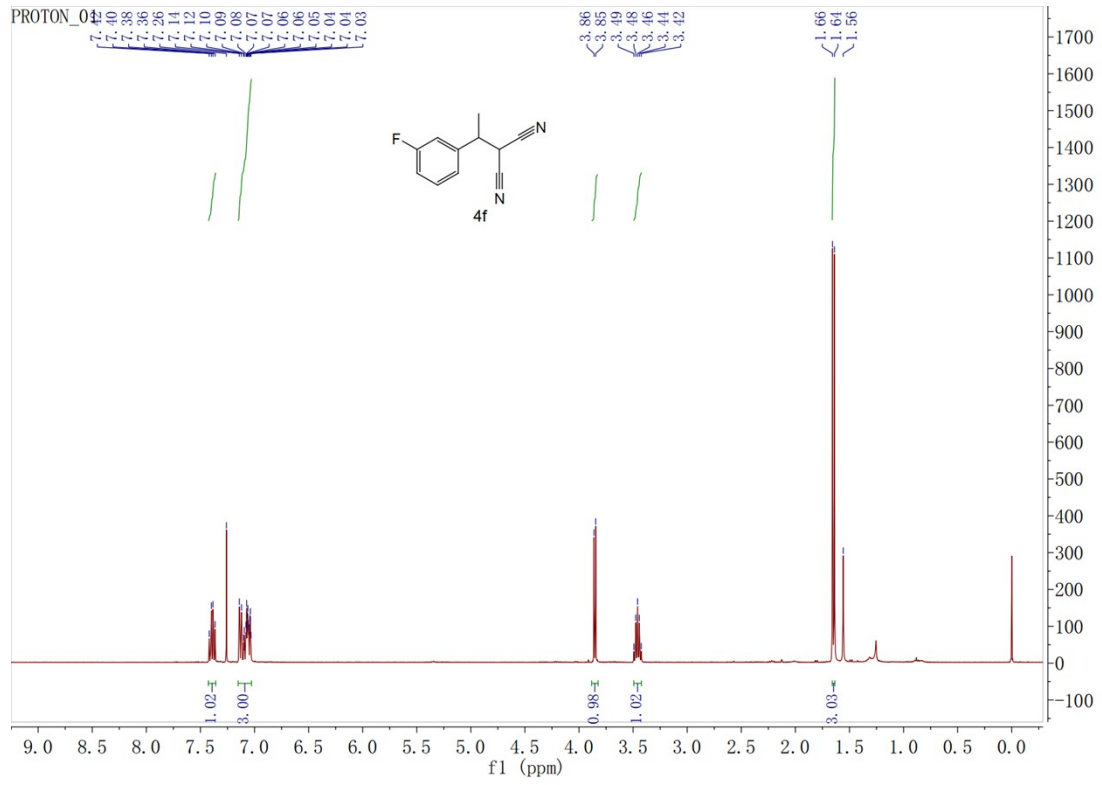

2

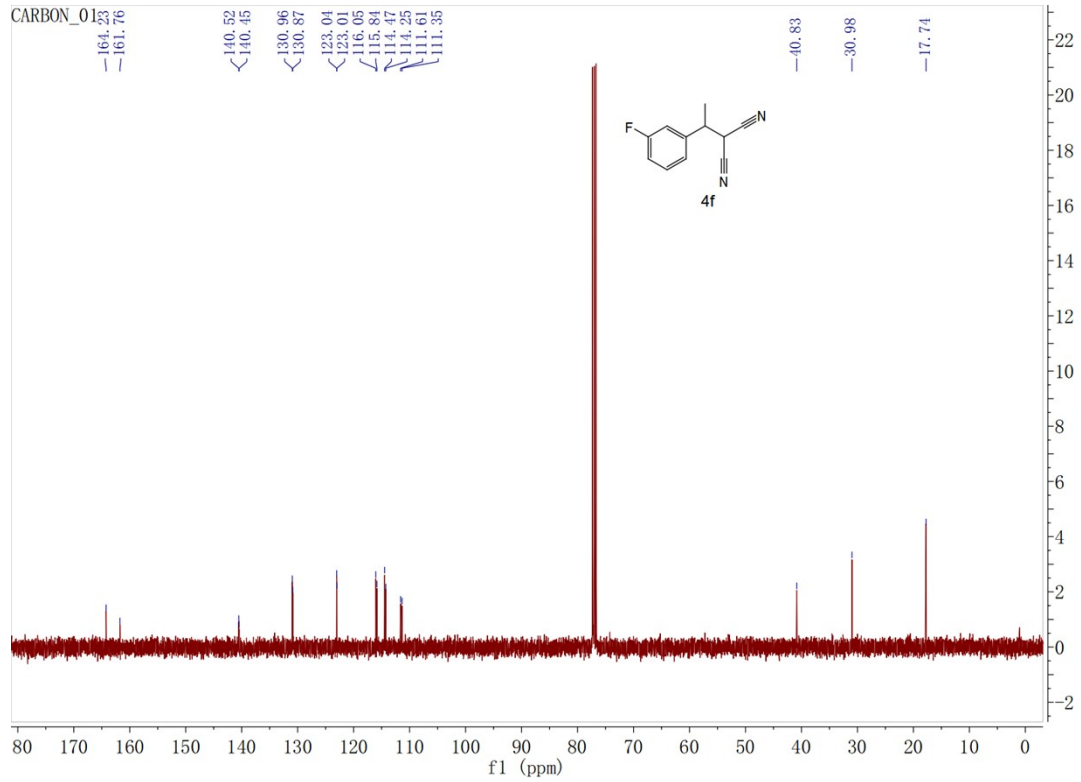

3

4

1 **2-(1-(4-fluorophenyl)ethyl)malononitrile (4g)**

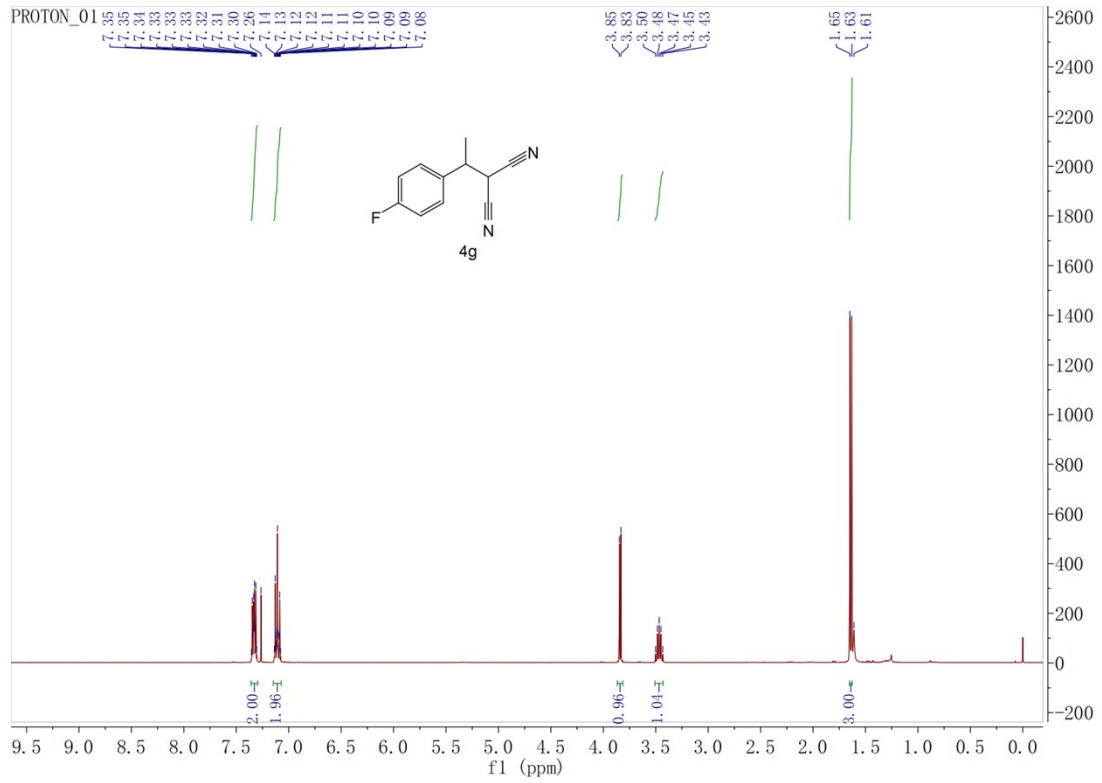

2

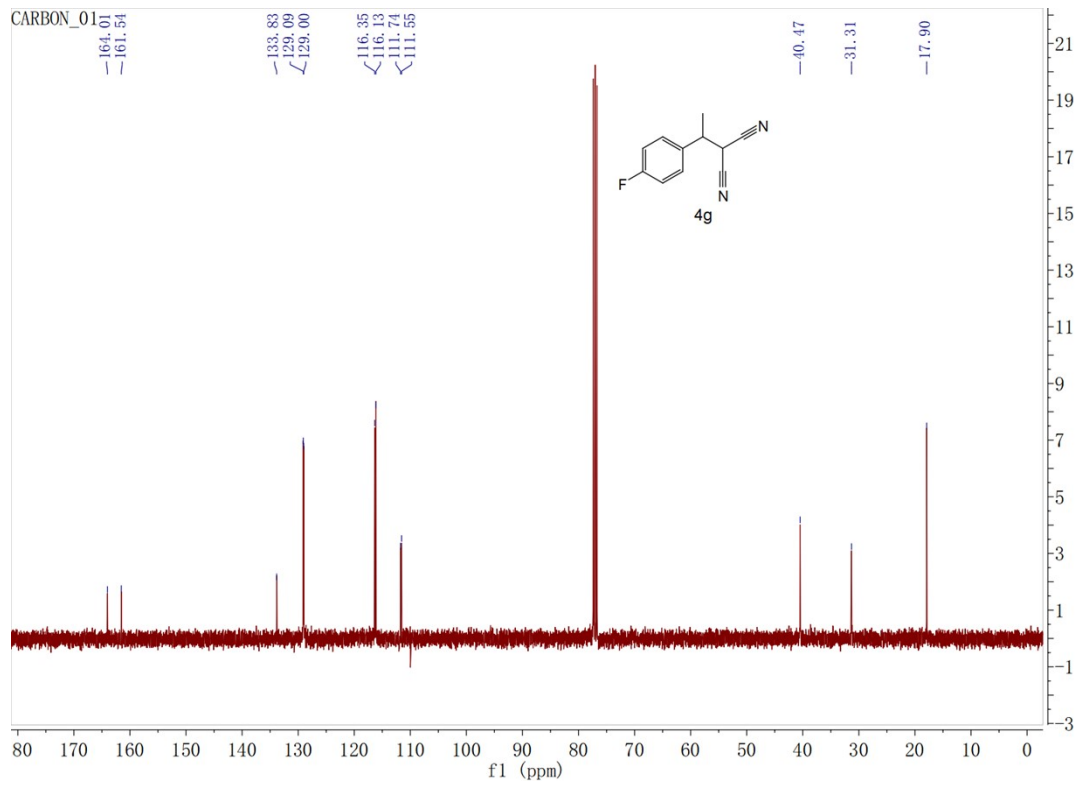

3

4

1 **2-(1-(2-bromophenyl)ethyl)malononitrile (4h)**

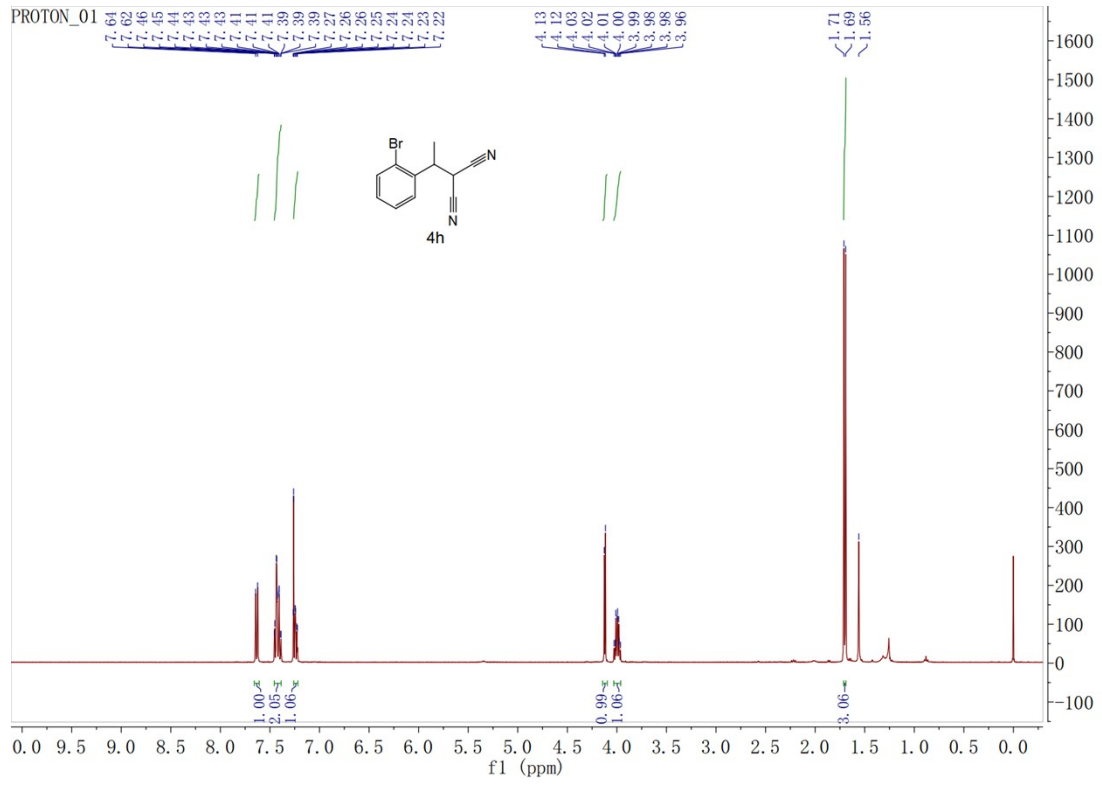

2

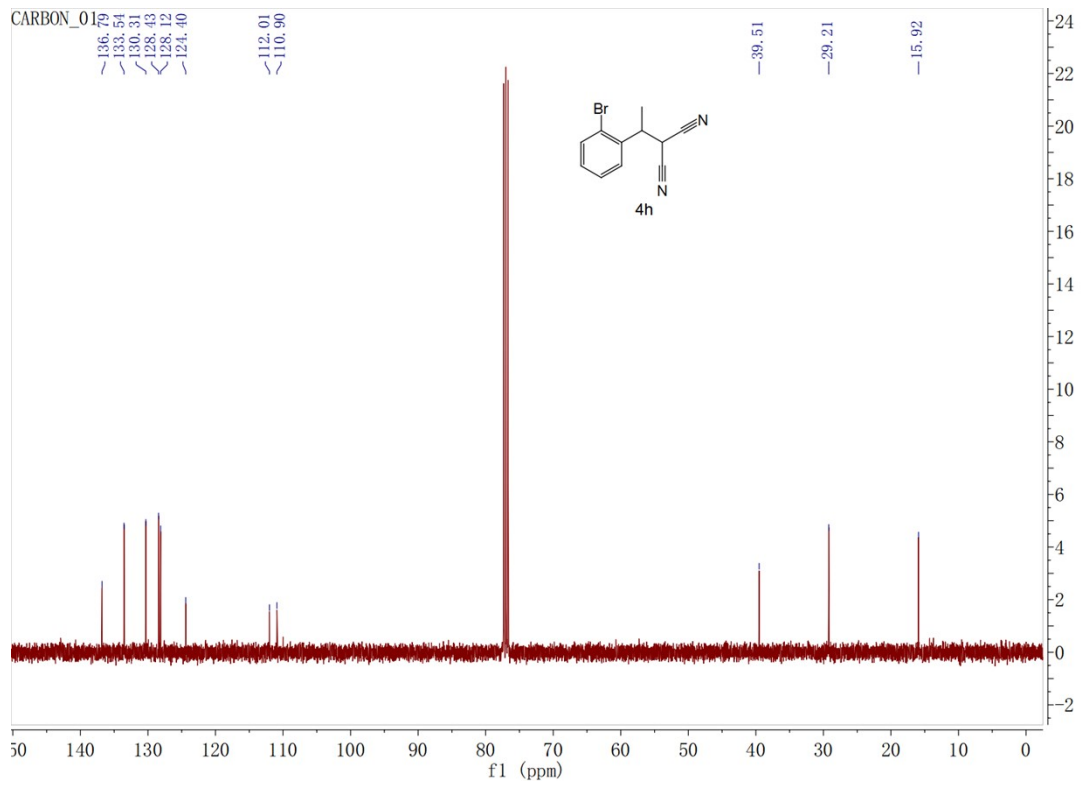

3

4

1 **2-(1-(4-chlorophenyl)ethyl)malononitrile (4i)**

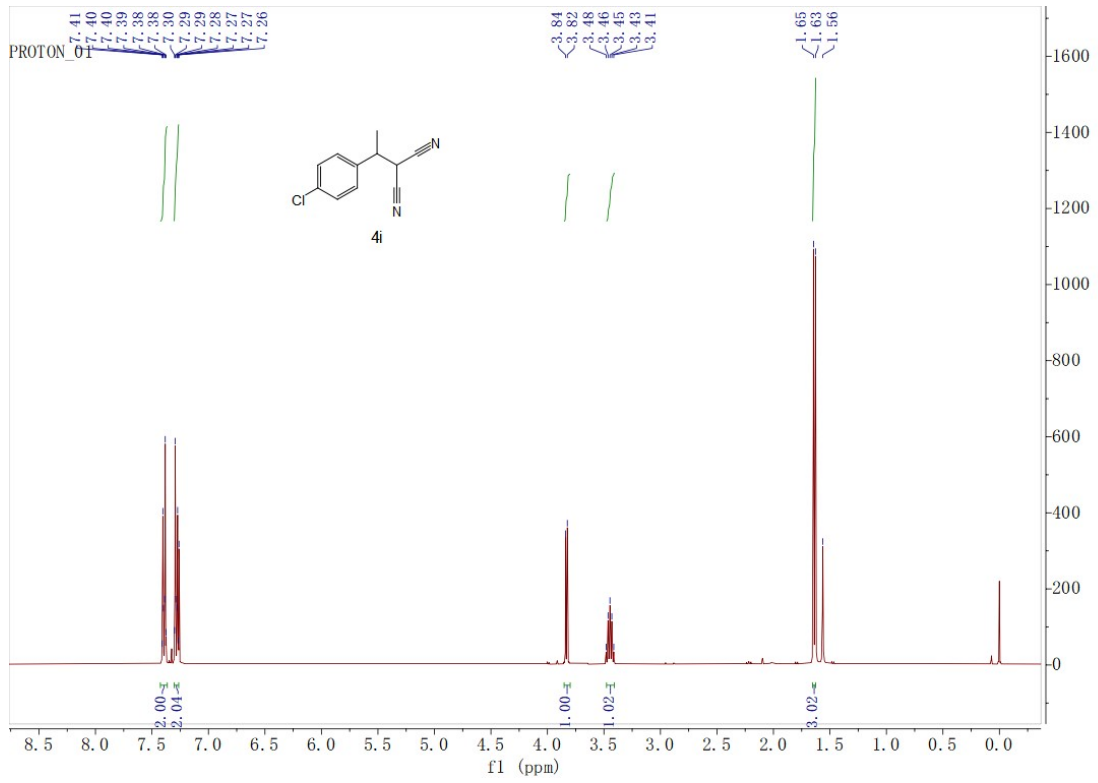

2

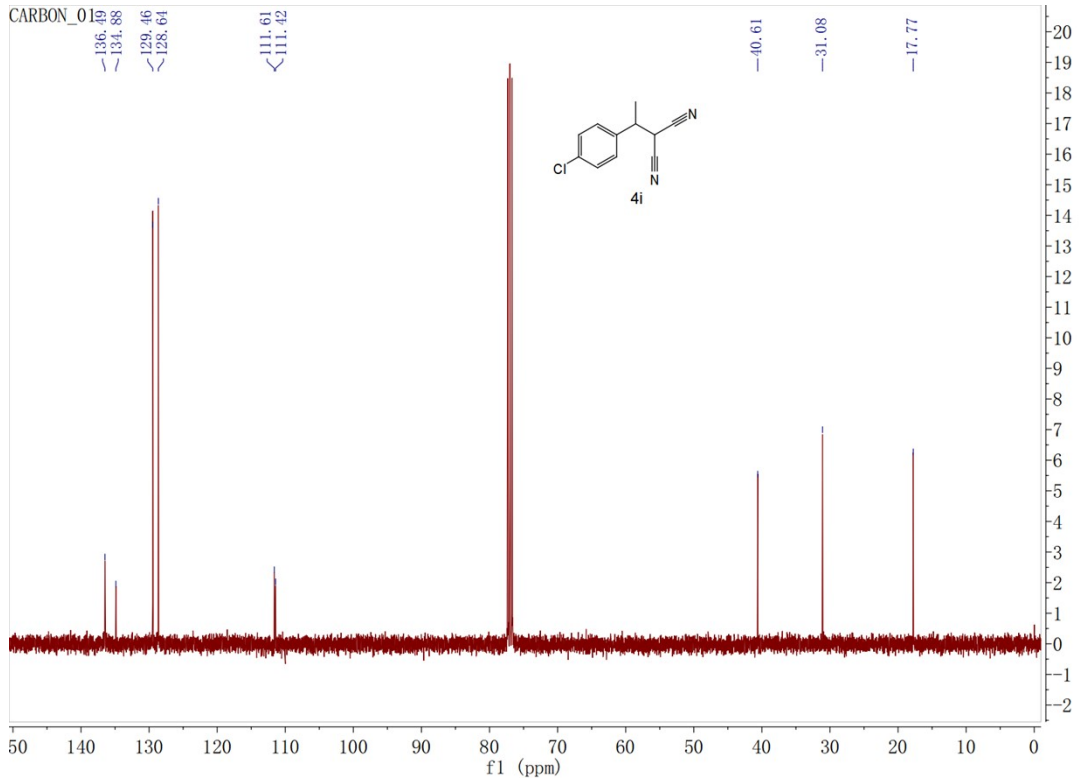

3

4

1 **2-(1-(4-bromophenyl)ethyl)malononitrile (4j)**

2

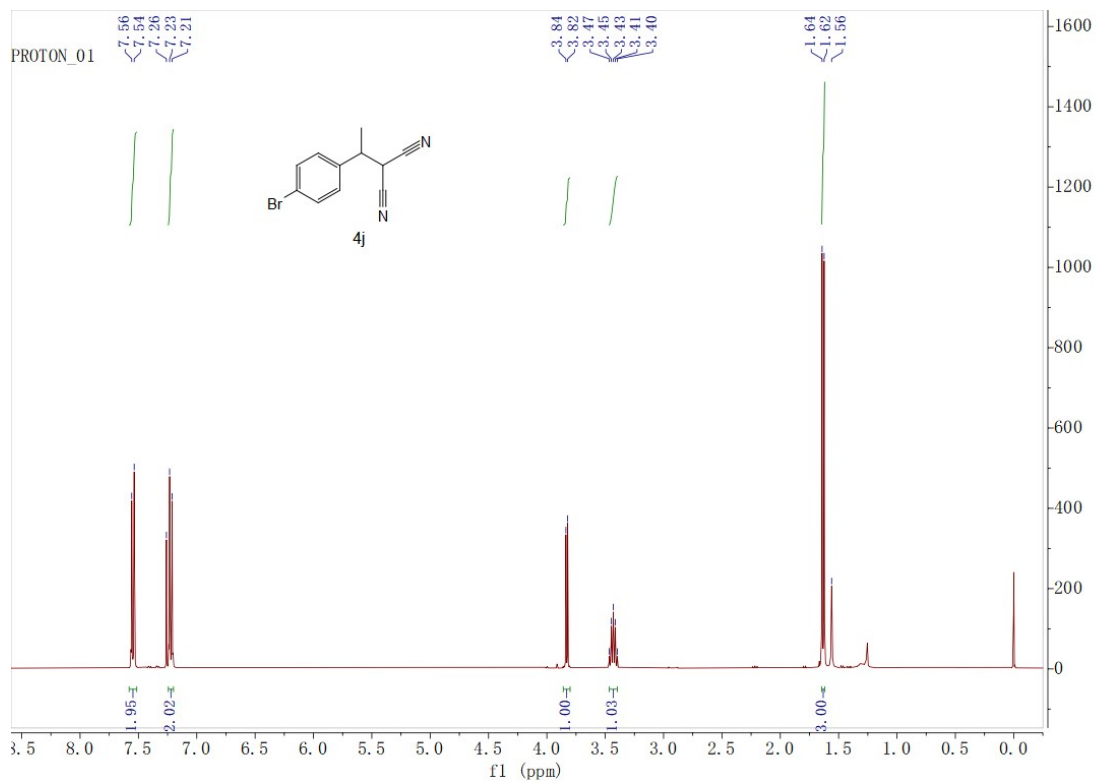

3

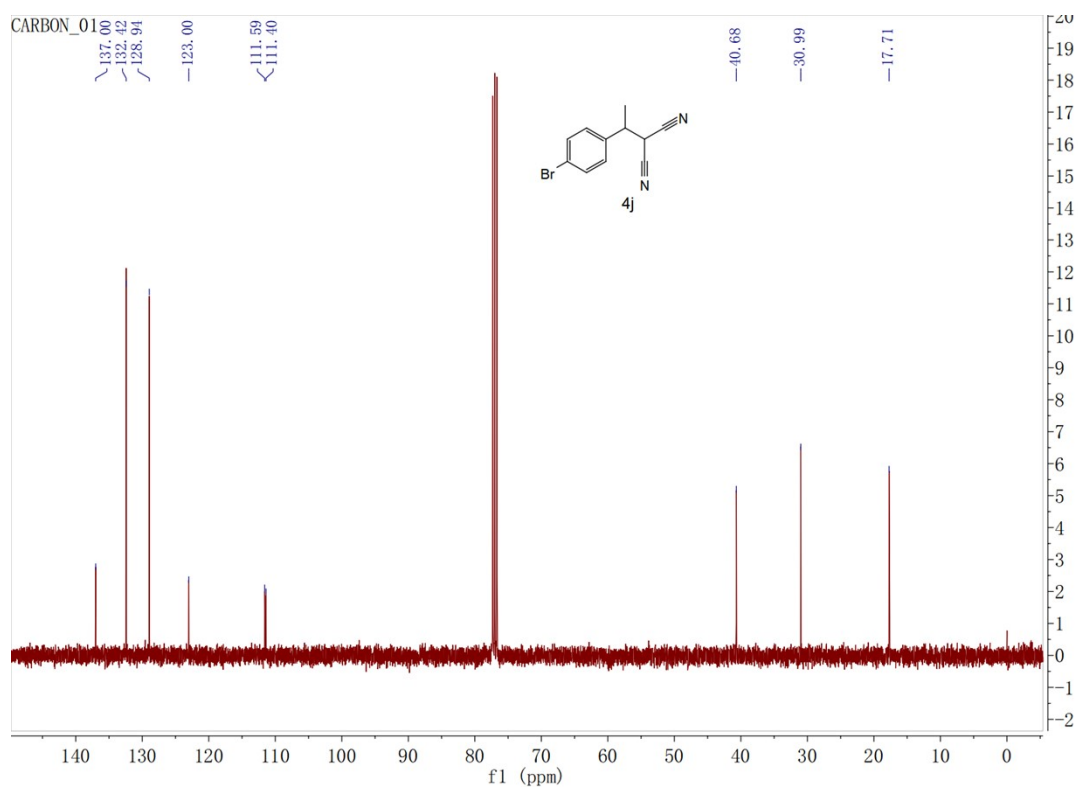

4

5

1 **2-(1-(4-(trifluoromethyl)phenyl)ethyl)malononitrile (4k)**

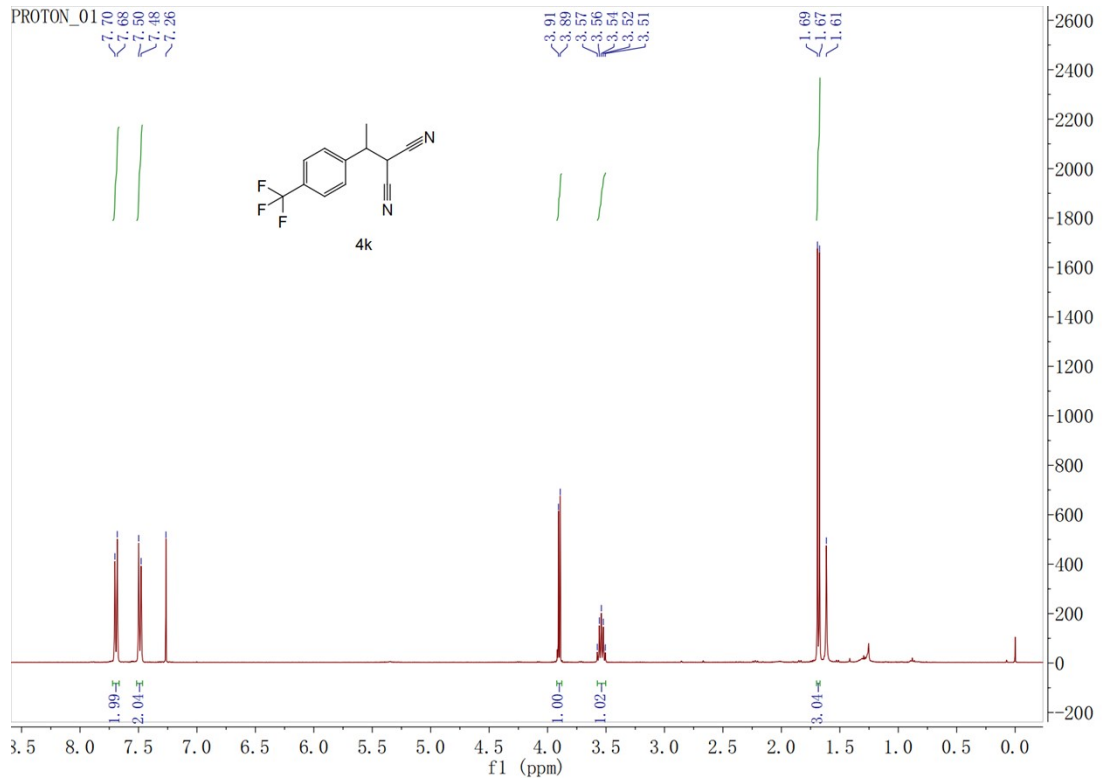

2

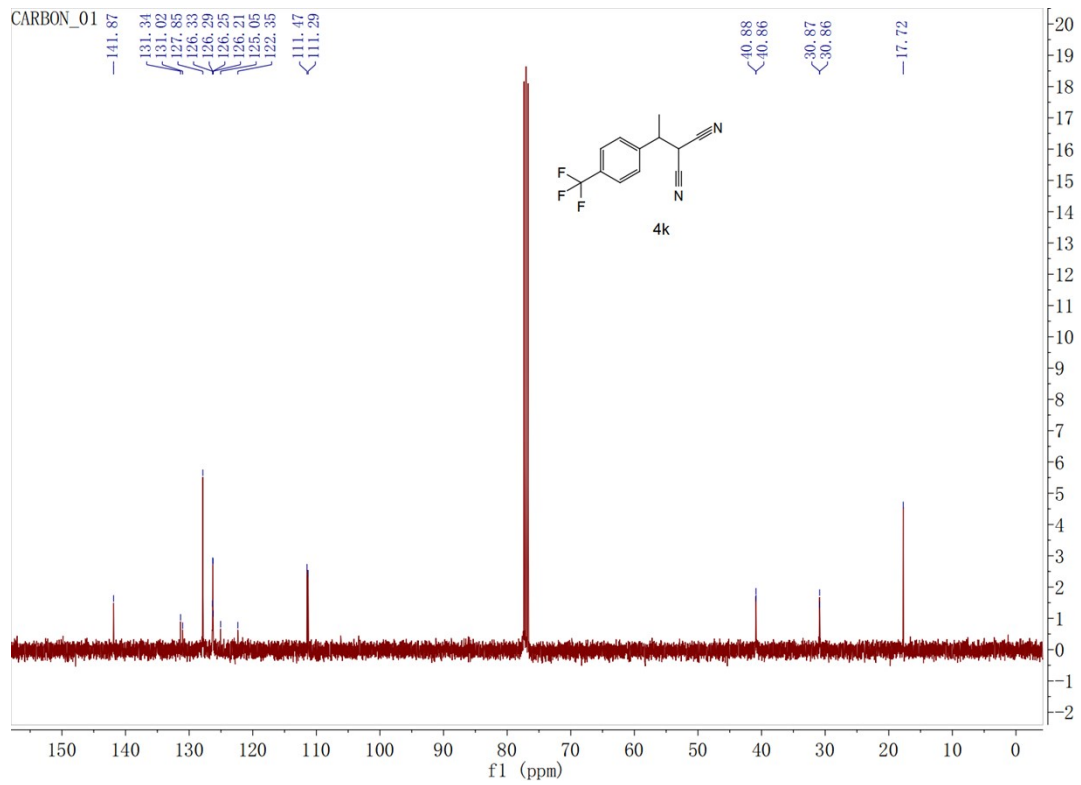

3

4

5

1 **2-(1-(4-methoxyphenyl)ethyl)malononitrile (4l)**

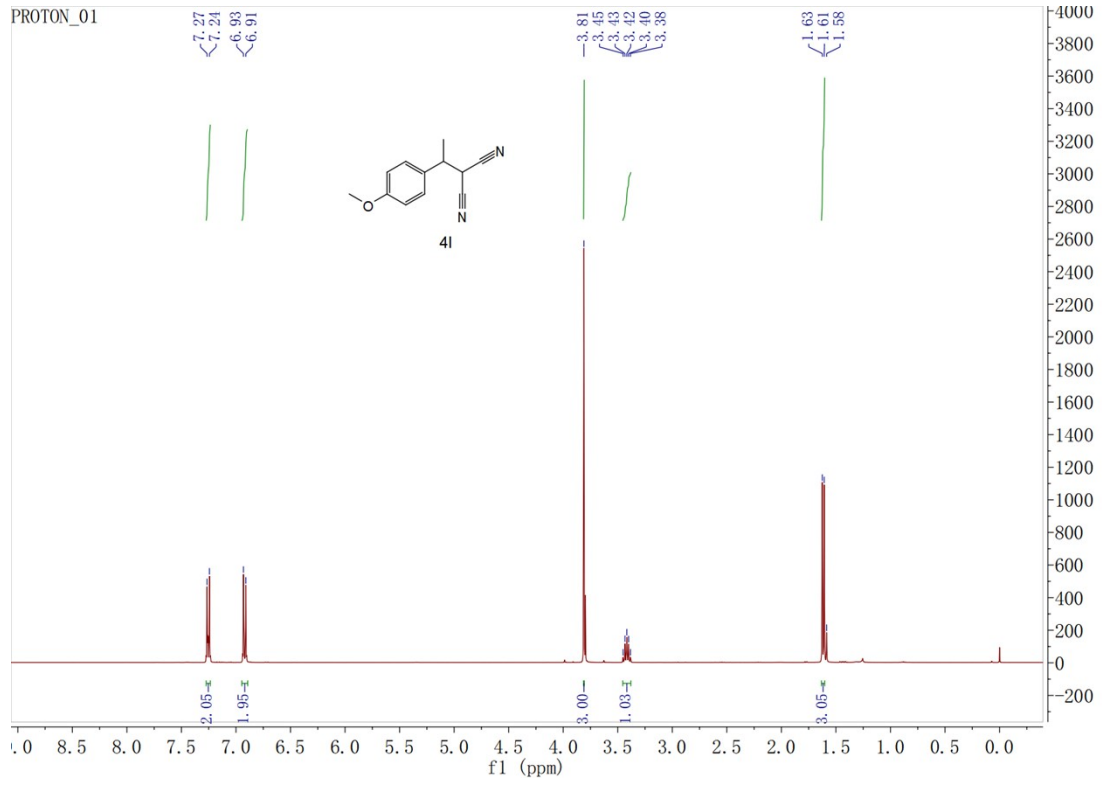

2

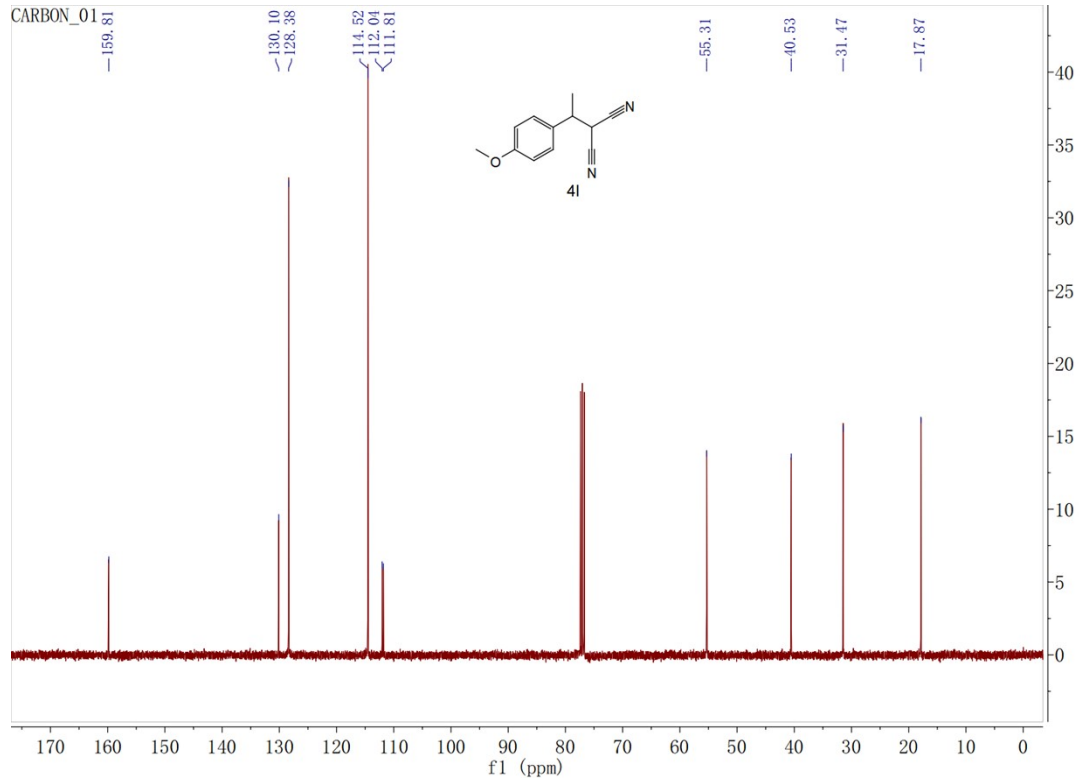

3

4

1 **2-(1-(4-(methylthio)phenyl)ethyl)malononitrile (4m)**

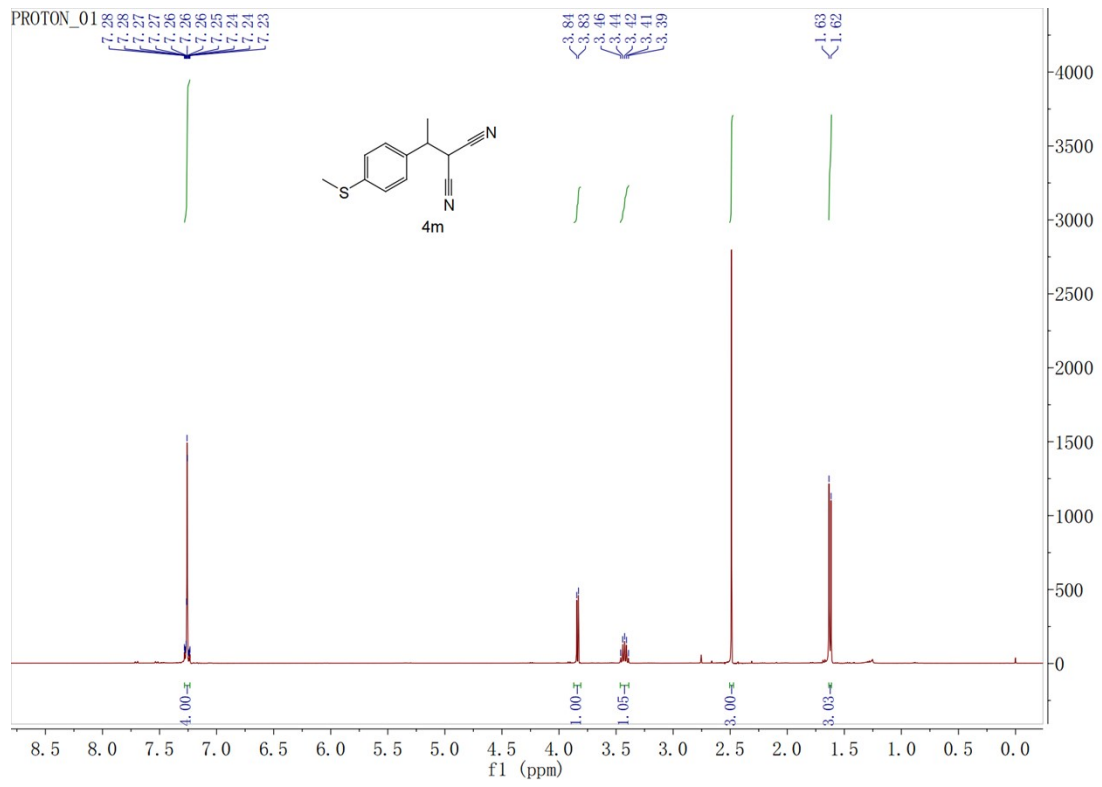

2

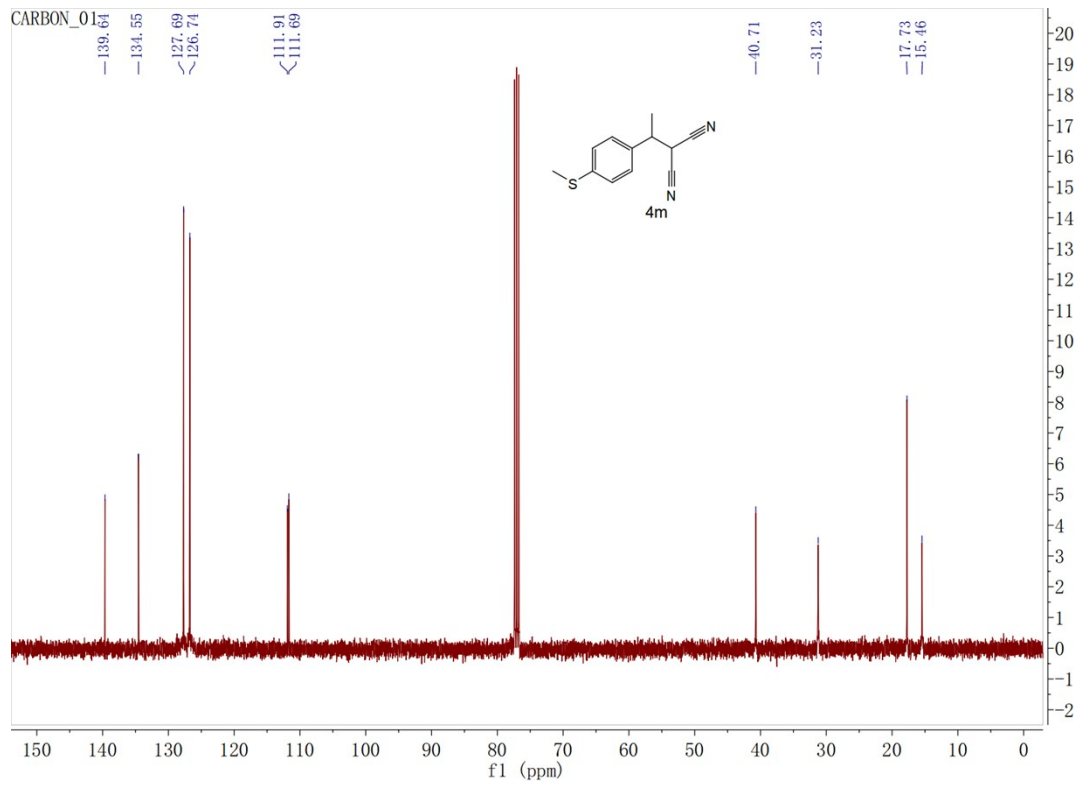

3

4

5



1 **2-(1-(thiophen-2-yl)ethyl)malononitrile (4n)**

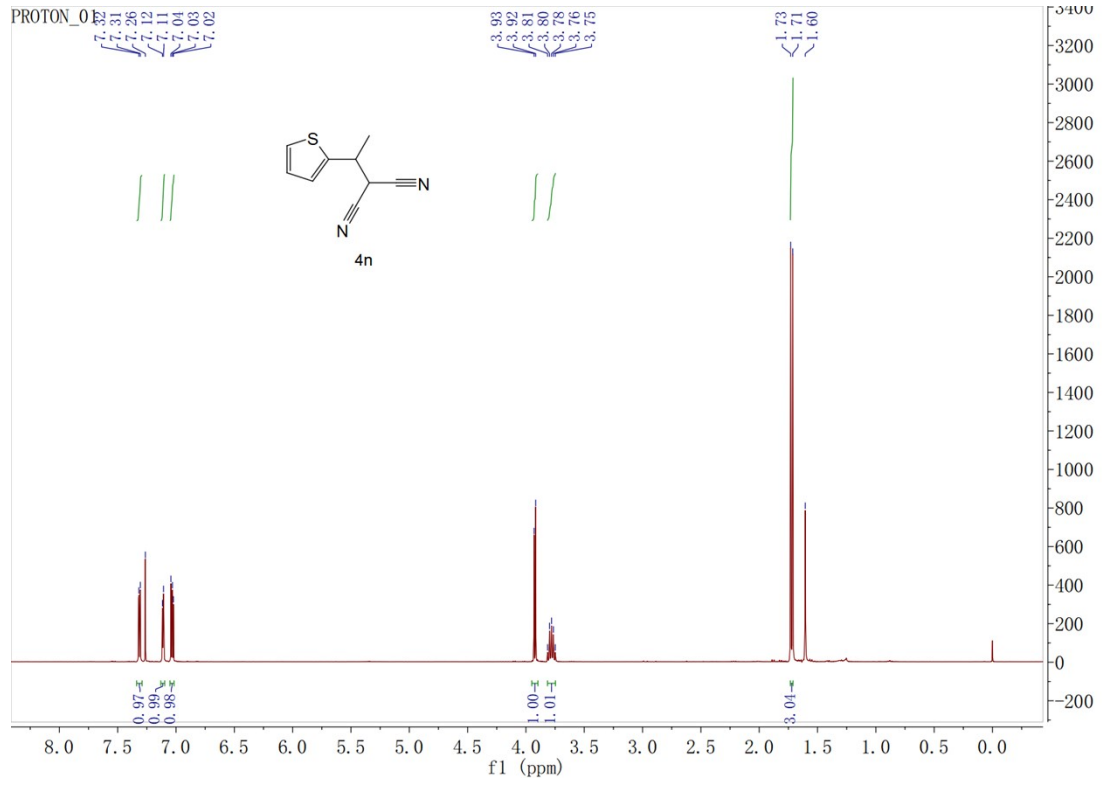

2

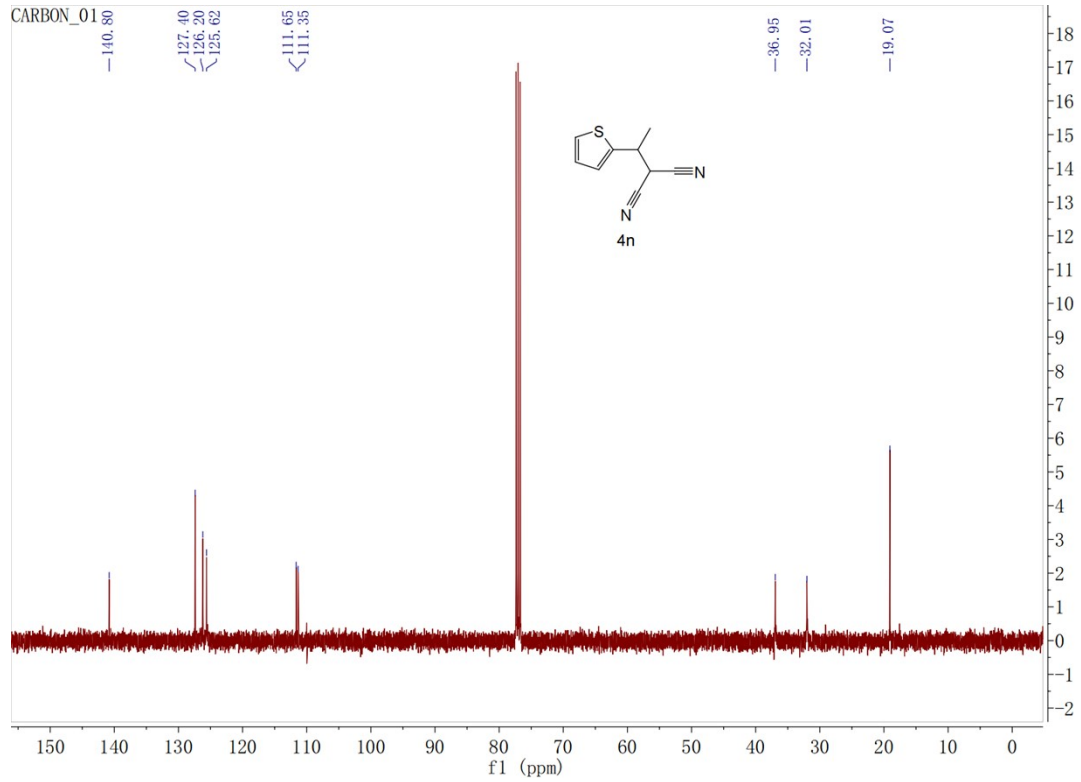

3

4

1 ethyl 2-cyano-3-phenylpropanoate (4o)

2

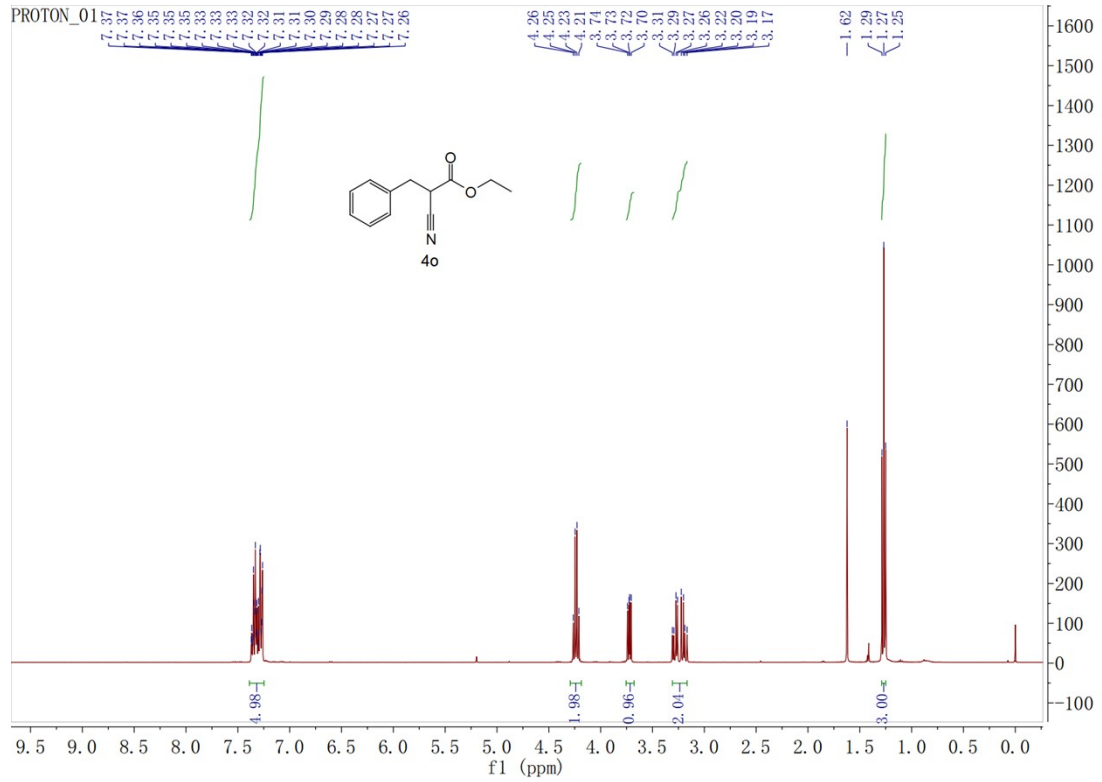

3

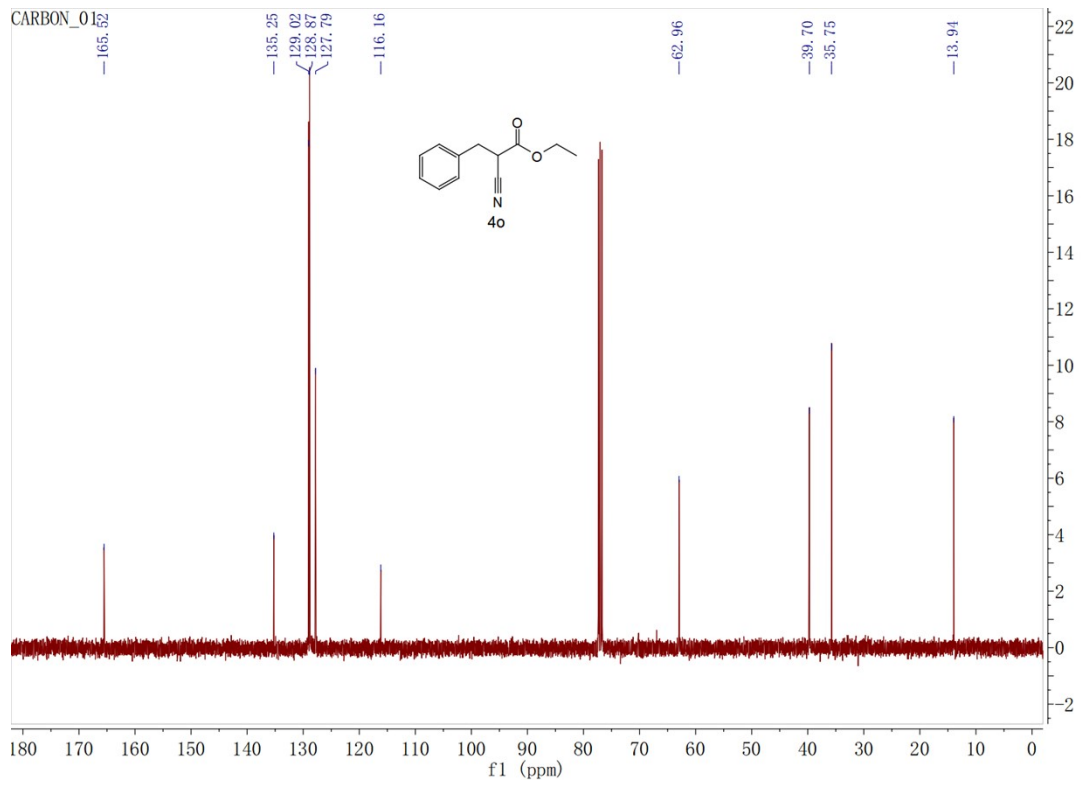

4

5

6

## 1 **6 References**

- 2 1 M. Zhang, A.-Q. Zhang and Z.-H. Deng, Two mild methods for synthesis of  $\alpha,\beta$  –  
3 unsaturated cyanoesters, *J. Chem. Res.*, **2005**, 1,69-70.
- 4 2 B. C. Ranu and S. Samanta, Use of indium hydride ( $\text{Cl}_2\text{InH}$ ) for chemoselective  
5 reduction of the carbon-carbon double bond in conjugated alkenes, *Tetrahedron Lett.*,  
6 **2002**, 43, 7405-7407.
- 7 3 (a) Y. Pompeu, B. Sullivan and J. D. Stewart, X-Ray Crystallography Reveals How  
8 Subtle Changes Control the Orientation of Substrate Binding in an Alkene Reductase,  
9 *ACS catal.*, **2013**, 3, 2376-2390; (b) R. W. Powell, M. P. Buteler, S. Lenka, M. Crotti,  
10 S. Santangelo, M. J. Burg, S. Bruner, E. Brenna, A. E. Roitberg and J. D. Stewart,  
11 Investigating: *Saccharomyces Cerevisiae* Alkene Reductase OYE 3 by Substrate  
12 Profiling, X-Ray Crystallography and Computational Methods, *Catal. Sci. Technol.*,  
13 **2018**, 8, 5003-5016; (c) S. Reich, H. W. Hoeffken, B. Rosche, B. M. Nestl and B.  
14 Hauer, Crystal Structure Determination and Mutagenesis Analysis of the Ene  
15 Reductase NCR, *Chembiochem*, **2012**, 13, 2400-2407.
- 16  
17  
18
